# Supplementary material for: From Prevention to Disease Perturbations: A Multi-Omic Assessment of Exercise and Myocardial Infarctions
Source: Biomolecules. 2020 Dec 30;11(1):40. doi: 10.3390/biom11010040 (PMC7824308; doi:10.3390/biom11010040)
Supplement: Supplementary file 1 [file biomolecules-11-00040-s001.xlsx]

## Sheet: TableS1
ETT Cohort, n = 25
							CARDIAC RISK FACTORS								MEDICATIONS
		Sex	Race	Wt	Ht	BMI	HTN	DM	Chol	Smoke	ETOH	MI	CHF	Stroke	ASA	BB	NTG	CCB	ACEI	ARB	Diuretic	AA	nitrate	Statin	Non-statin lipid lowering agents	Insulin	Sulfonylurea	Metformin	Glitazone	Glyburide	Plavix	Write Ins	DurT	METS	BLHR	PKHR	BL SBP	BL DBP	PK SBP	PK DBP	MPHR	HRBP	Ischemia
BL Run #	Age	1=Male 0=Female	1=White 2=Black 3=Hispanic 4=Asian 5=Other	lbs	inches		1=Yes 0=No	0=Neither 1=NIDDM 2=IDDM	1=High 0=Norm	0=Never 1=Former 2=Current	0=Never 1=yes	1=Yes 0=No	1=Yes 0=No	1=Yes 0=No	0=No 1=24hr 2=yes	0=No 1=24hr 2=yes	0=No 1=24hr 2=yes	0=No 1=24hr 2=yes	0=No 1=24hr 2=yes	0=No 1=24hr 2=yes	0=No 1=24hr 2=yes	0=No 1=24hr 2=yes	0=No 1=24hr 2=yes	0=No 1=24hr 2=yes	0=No 1=24hr 2=yes	0=No 1=24hr 2=yes	0=No 1=24hr 2=yes	0=No 1=24hr 2=yes	0=No 1=24hr 2=yes	0=No 1=24hr 2=yes	0=No 1=24hr 2=yes		min:sec		bpm	bpm	mmHg	mmHg	mmHg	mmHg	85% MPHR	double product	0=No, 1=ECG Only 2=Mild 3=Moderate/Severe 4=Moderate/Severe w/ Complete Datatset
1	66	M	C	156	68	24	1	0	1	1	1	0	0	0	1	1	0	0	0	0	0	0	0	0	0	0	0	0	0	0	0	fish oil. Glucosamine, viagra	15:00	17	55	144	138	88	180	86	153	25920	0
3	57	M	C	202	72	27	0	0	1	0	1	0	0	0	0	0	0	0	0	0	0	0	0	1	0	0	0	0	0	0	0	ambien, effexor, advil	9:31	11	75	146	132	80	160	80	162	23360	0
5	70	M	C	173	67	27.0927	1	2	1	0	0	0	0	0	1	1	0	0	0	0	0	0	0	1	0	1	0	0	0	0	0	nexium, prednisone, calcitrol	8:02	10	70	120	114	72	154	60	150	18480	0
7	53	M	C	310	74	40	1	0	0	0	1	0	0	0	1	0	0	0	0	0	1	0	0	1	0	0	0	0	0	0	0	coumadin	8:59	10	78	164	136	88	184	86	167	30176	0
9	64	M	C	173	69	25.5448	1	1	1	2	1	1	0	0	1	0	0	1	0	1	0	0	0	1	0	0	1	1	0	0	0	Prilosec	6:18	7	61	120	146	60	160	80	156	19200	2
11	71	F	C	203	63	35.9559	1	0	1	0	0	1	1	0	1	1	0	0	1	0	1	0	0	1	0	0	0	0	0	0	1	potassium	2:45	3	67	141	106	58	180	80	148	25380	4
13	64	F	C	210	65	35	1	1	1	0	0	0	0	0	0	1	0	0	0	0	1	0	0	1	0	1	0	1	0	0	0	0	6:22	8	54	107	148	78	194	82	155	20758	0
15	53	M	C	185	73	24.4051	1	0	1	0	1	0	0	0	0	2	2	0	1	0	0	0	0	1	1	0	0	0	0	0	1	buspar, effexor, folic acid, ativan, zantac	9:40	11	67	131	122	80	170	70	168	22270	4
17	53	M	C	205	73	27	0	0	1	2	1	0	0	0	0	0	0	0	0	0	0	0	0	0	0	0	0	0	0	0	0	0	9:00	10	64	151	120	68	136	72	167	20536	0
19	67	M	C	198	72	26.8507	1	1	1	0	1	1	0	0	1	1	1	1	0	0	0	0	0	1	0	0	0	1	0	0	1	Prilosec	8:40	10	60	93	146	70	166	60	152	15438	4
21	67	M	C	130	64	22	0	0	0	0	0	0	0	0	0	0	0	0	0	0	0	0	0	0	0	0	0	0	0	0	0	prilosec	10:00	12	48	166	132	70	160	70	154	26560	0
23	65	M	C	207	69	31	0	0	0	1	1	0	0	0	0	0	0	0	0	0	0	0	0	0	0	0	0	0	0	0	0	allopurinol, levoxyl, prilosec, ambien, plaquenil, capecitabine	6:01	7	60	141	124	62	150	72	156	21150	0
25	61	M	C	145	67	22.7077	1	0	1	0	0	0	0	0	1	1	0	0	0	0	0	0	0	1	0	0	0	0	0	0	1		11:16	13	57	134	134	80	169	78	159	21976	3
27	55	M	C	202	72	27.3931	1	0	1	1	1	0	0	0	0	0	0	1	0	0	0	0	0	1	1	0	0	0	0	0	0	0	12:00	13	67	155	120	80	224	80	163	34720	0
29	64	M	C	190	66	30.6635	1	1	1	1	1	0	0	0	1	0	2	0	1	0	0	0	1	1	0	0	0	2	0	0	1	fish oil, Imdur, MVI	5:30	7	62	127	182	98	154	90	157	24130	4
31	67	M	C	223	69	33	1	0	0	1	1	0	0	0	0	0	0	1	0	1	0	0	0	0	0	0	0	0	0	0	0	allopurinol	6:00	7	64	150	156	80	210	80	153	31500	0
33	50	M	C	216	69	31.8941	1	0	1	0	1	1	0	0	1	1	0	0	1	0	0	0	0	1	0	0	0	0	0	0	0	0	9:31	11	75	162	120	90	152	86	171	24624	4
35	50	M	C	336	73	44	1	0	1	1	0	0	0	0	1	1	0	0	0	0	0	0	0	1	0	0	0	0	0	0	0	allopurinol	9:21	11	68	173	136	82	200	70	170	34600	0
37	67	F	C	160	65	27	0	0	1	0	0	0	0	0	1	0	0	0	0	0	0	0	0	1	0	0	0	0	0	0	0	omeprazole, prednisone, atrovent, betamethasone, clonazepam, fosamax, cymbalta, flovent	5:00	7	75	133	132	80	152	80	153	20216	0
39	72	F	C	179	62	33	1	0	1	0	0	0	0	0	1	1	0	0	0	0	1	0	0	1	0	0	0	0	0	0	0	celexa, pantoprazole, antivert	4:29	6	60	130	146	60	172	62	148	22360	1
41	69	M	C	162	68	25	1	0	1	1	1	0	0	0	1	1	0	1	0	0	0	0	1	1	0	0	0	0	0	0	1	albuterol, zyrtec, pulmicort, rhinocort	7:37	9	68	113	134	60	176	70	151	19888	2
43	56	M	H	210	67	32.8871	1	0	1	0	0	1	0	0	1	1	0	0	1	0	1	0	0	0	1	0	0	0	0	0	0	0	12:45	15	53	141	95	55	145	90	166	20445	3
45	51	M	C	215	70	31	0	0	1	0	0	0	0	0	1	0	0	0	0	0	0	0	0	1	0	0	0	0	0	0	0	0	12:01	13	63	173	120	80	194	80	170	33562	0
47	67	M	C	195	67	30.538	1	0	1	0	1	0	0	0	1	1	0	0	0	0	0	0	0	1	1	0	0	0	0	0	0	Buspar, Wellbutrin	10:00	12	56	120	144	72	166	82	154	19920	2
49	66	F	C	202	65	33.6109	1	1	1	0	0	0	0	0	1	1	1	0	1	0	1	0	0	1	0	0	1	1	0	0	0	k dur	5:26	3	76	116	112	70	160	70	155	18560	4
PMI Cohort, n = 20
BL Run #	Age	Race	Sex	Wt	Ht	BMI	HTN	DM	Chol	Smoke	ETOH	CAD	SOB	MI	CHF	Afib	ASA	BB	NTG	CCB	ACEI	ARB	Diuretic	AA	nitrate	Statin	Non-statin lipid lowering agents	Insulin	Sulfonylurea	Metformin	Glitazone	Glyburide	Coumadin	Plavix	Write Ins
							(%)	(gm/dL)	(%)	(g/dL)	1=Yes 0=No	1=High 0=Norm	0=Never 1=Former 2=Current	0=Never 1=yes	1=Yes 0=No	1=Yes 0=No	1=Yes 0=No	1=Yes 0=No	1=Yes 0=No		0=No 1=24hr 2=yes	0=No 1=24hr 2=yes	0=No 1=24hr 2=yes	0=No 1=24hr 2=yes	0=No 1=24hr 2=yes	0=No 1=24hr 2=yes	0=No 1=24hr 2=yes	0=No 1=24hr 2=yes	0=No 1=24hr 2=yes	0=No 1=24hr 2=yes	0=No 1=24hr 2=yes	0=No 1=24hr 2=yes	0=No 1=24hr 2=yes	0=No 1=24hr 2=yes
51	71	C	F	140	58	31.4	1	1	1	1	0	1	1	0	1	1	1	1	0	0	0	0	1	1	0	1	0	0	0	0	0	0	1	0	aldactone, alendronate, MVI, miralax, prednisone, prograf, vit c, vit d2, vit D3
53	60	C	M				1	1	1	2	0	1	1	0	0	0	1	1	0	0	1	0	0	0	0	1	0	0	0	1	0	0	0	1	januvia, flomax
55	70	C	F				0	0	1	1	0	1	1	0	0	0	1	0	0	1	0	0	0	0	0	1	0	0	0	0	0	0	0	1	cymbalta, klonopin, trazodone, xanax
57	71	C	M	190	69	28.1	0	1	1	1	0	1	1	0	0	0	1	1	0	0	0	0	0	0	0	1	0	0	0	0	0	0	0	0	viagra
59	60	C	M	280.1		40.2	1	1	1	1	0	1	1	0	0	0	1	1	0	1	0	0	1	0	0	1	0	1	1	1	0	0	0	0	januvia, bupropion, iron, KCL, protonix
61	58	C	F				0	0	0	1	0	0	0	0	0	0	0	1	0	0	0	0	1	1	0	0	0	0	0	0	0	0	0	0	dilantin, chantix, xanax, zoloft
63	72	C	F				1	0	1	0	0	0	1	0	0	1	1	1	0	1	0	0	0	0	0	1	0	0	0	0	0	0	0	0	vit B, calcium, mag, levothyroxine, vit D3, xarelto, CoQ10,lovaza, prilosec
65	80	C	M				1	1	1	1	1	1	1	0	0	0	1	1	0	0	0	0	1	0	0	1	0	0	0	0	0	0	0	0	KCL, Vit C
67	50	C	M				1	0	1	0	1	1	1	0	0	0	1	1	0	0	0	0	0	1	0	1	0	0	0	0	0	0	0	0	omeprazole, loratadine
69	78	C	M				0	0	1	1	1	1	1	1	0	1	0	1	0	0	0	0	1	0	0	1	0	0	0	0	0	0	1	0	citalopram, klor con, synthroid
71	50	H	M		66	41.6	1	0	1	1	0	1	1	0	0	0	0	1	0	0	0	0	0	1	0	1	0	0	0	0	0	0	0	0	nexium
73	54	C	M	167	68	25	0	0	1	0	0	0	0	0	1	0	0	1	0	1	0	0	0	0	0	1	0	0	0	0	0	0	1	0	avodart
75	64	C	M	196			1	1	1	1	1	0	1	0	0	0	1	1	0	1	0	0	0	0	0	0	0	0	0	0	0	0	0	0	advair, cymbalta, meloxicam, omeprazole, prednisone.
77	52	C	F	275	64	47.2	1	0	0	1	0	0	1	0	1	1	1	1	0	0	0	0	1	0	0	0	0	0	0	0	0	0	0	0	Effexor, celecoxib
79	71	C	F	212	62	38.9	1	0	0	0	0	1	1	0	0	0	0	1	0	0	0	0	1	1	0	0	0	0	0	0	0	0	0	0	levothyroxine, nexium
81	61	C	F	188	61	35.6	1	0	0	0	0	0	1	0	0	0	0	1	0	1	0	0	0	0	0	0	0	0	0	0	0	0	0	0	levoxyl, flexeril, MVI
83	55	C	M			44.8	1	1	1	1	0	1	1	0	0	1	1	1	0	1	1	0	1	1	0	1	0	0	0	1	0	0	0	0	bupropion, atrovent, nasonex, rantidine
85	60	C	F	206	66	33.2	1	0	1	1	0	0	1	0	0	0	1	1	0	1	1	0	0	0	0	1	0	0	0	0	0	0	0	0	levothyroixne, KCL
87	60	C	F				1	0	1	1	0	1	1	0	0	0	1	1	0	0	0	0	0	1	0	1	0	0	0	0	0	0	0	0	vit D
89	71	C	M	230	61	43.5	1	0	1	1	0	1	1	0	1	0	0	1	0	0	0	0	0	0	0	0	0	0	0	0	0	0	0	0	MVI

## Sheet: TableS2
		p cutoff 0.005					Patient 1		Patient 2		Patient 3		Patient 4		Patient 5		Patient 6		Patient 7		Patient 8		Patient 9		Patient 10		Patient 11		Patient 12		Patient 13		Patient 14		Patient 15		Patient 16		Patient 17		Patient 18		Patient 19		Patient 20		Patient 21		Patient 22
Lipid	Ionization Mode	p_adjust	Log2FC(Before/After)	Flag	Avg. Before	Avg. After	BIDMC-1-Lipid	BIDMC-2-Lipid	BIDMC-3-Lipid	BIDMC-4-Lipid	BIDMC-5-Lipid	BIDMC-6-Lipid	BIDMC-7-Lipid	BIDMC-8-Lipid	BIDMC-9-Lipid	BIDMC-10-Lipid	BIDMC-11-Lipid	BIDMC-12-Lipid	BIDMC-13-Lipid	BIDMC-14-Lipid	BIDMC-15-Lipid	BIDMC-16-Lipid	BIDMC-17-Lipid	BIDMC-18-Lipid	BIDMC-19-Lipid	BIDMC-20-Lipid	BIDMC-21-Lipid	BIDMC-22-Lipid	BIDMC-23-Lipid	BIDMC-24-Lipid	BIDMC-25-Lipid	BIDMC-26-Lipid	BIDMC-27-Lipid	BIDMC-28-Lipid	BIDMC-29-Lipid	BIDMC-30-Lipid	BIDMC-31-Lipid	BIDMC-32-Lipid	BIDMC-33-Lipid	BIDMC-34-Lipid	BIDMC-35-Lipid	BIDMC-36-Lipid	BIDMC-37-Lipid	BIDMC-38-Lipid	BIDMC-39-Lipid	BIDMC-40-Lipid	BIDMC-41-Lipid	BIDMC-42-Lipid	BIDMC-43-Lipid
PC(20:5_0:0)	Positive	0.0171414	-0.33502	0	17.3975	17.7326	18.5951	18.5309	17.5613	17.9867	17.6857	17.9058	18.4217	18.4022	17.99	18.2235	17.3076	17.3429	16.195	16.8483	18.5713	18.7853	16.7775	16.8594	17.5511	17.6416	16.8175	17.2265	17.6049	17.6946	17.5022	18.0257	16.72	17.2703	17.6474	17.8792	17.0025	17.7754	16.6297	17.1092	16.9703	17.4811	16.2881	17.1203	17.3135	17.1796	18.1936	19.5767	18.7798
GM3(d34:1)	Negative	0.338531	-0.0880462	0	14.8985	14.9866	15.5582	15.8939	14.6867	14.5299	15.4992	14.7772	15.0556	15.1071	14.8605	15.1059	14.832	14.4969	14.6307	14.7787	15.59	15.3387	15.3908	15.3051	14.5843	14.8015	15.8103	15.7776	15.0041	15.0308	14.1144	14.8385	14.9921	14.6033	14.4941	14.6234	14.6939	14.4966	14.8066	14.983	15.2593	15.503	15.3133	15.3351	13.3922	14.4845	14.4476	14.8357	15.1083
PE(P-16:0/18:2)	Negative	0.338531	0.0856288	0	19.8722	19.7866	19.597	19.6211	19.1753	19.0382	20.3516	20.3647	19.9014	19.7326	20.304	20.4215	20.1215	19.9039	19.2373	19.2499	19.7024	19.5187	20.058	19.7723	19.9898	20.1547	19.9289	19.8865	20.5156	20.3608	19.6123	19.737	19.6777	19.5828	19.9419	20.0902	20.1508	20.0484	19.7724	19.732	19.9313	19.9305	20.5888	20.3681	19.7991	19.6959	19.5613	19.3353	19.5509
carnitine(10:1)	Positive	0.346953	-0.3686	0	14.3875	14.7561	14.2554	15.2021	13.1283	13.5193	14.5697	14.472	15.1827	15.1599	14.1824	14.1697	14.9181	15.9035	14.0478	14.9463	14.6564	14.6203	13.8864	14.5467	13.8817	13.3174	13.9856	15.2016	15.9171	15.1213	15.1662	14.9699	15.0437	15.1016	14.5515	15.0958	14.5602	15.0012	12.6038	12.881	15.2708	15.7515	13.8378	14.3076	14.8405	15.096	12.9636	15.0288	13.5969
carnitine(14:1)	Positive	0.346953	-0.241327	0	14.1798	14.4211	14.5444	14.5963	12.2782	12.8029	14.6739	14.2928	15.307	14.9819	13.1955	13.3985	15.1998	15.6168	14.201	14.5216	14.4054	14.5288	12.9514	13.5613	13.1214	12.8957	14.7731	14.7728	15.1918	15.4839	14.8122	14.659	14.5453	14.4704	13.2354	13.1368	14.3716	14.9058	12.2833	13.0281	14.2581	14.5305	13.7772	14.4117	14.4297	15.2763	13.7032	14.8931	14.4496
DG(18:1_18:2_0:0)	Positive	0.346953	-0.0559422	0	21.1097	21.1657	20.6912	20.7383	21.6913	21.7857	21.4392	21.4702	21.3425	21.4156	20.5079	20.5452	20.7875	20.8344	21.3049	21.2777	21.0998	21.0543	21.3756	21.2989	20.8891	20.9814	20.9326	20.9201	21.7041	21.881	20.8067	20.776	21.5565	21.5981	20.2095	20.3667	20.2089	20.3904	21.7526	21.7358	22.0145	22.3049	21.4203	21.3633	21.6883	21.6771	20.6957	20.6396	20.7971
PC(18:2_0:0)_A	Positive	0.556909	-0.098293	0	19.9359	20.0342	20.1381	20.2615	19.7145	20.0628	20.8965	20.794	20.1403	20.302	20.6213	20.668	19.5837	19.5727	19.2583	19.7974	20.5208	20.8233	20.2107	20.2892	19.8216	19.982	19.6343	19.6129	20.4841	20.5063	20.2359	20.2601	20.7193	21.1656	20.2114	20.1759	19.5929	19.8377	19.9884	19.7801	19.9127	19.8878	18.7718	18.9762	19.4687	19.6343	20.137	20.1507	18.7503
DG(18:2_0:0_18:2)	Positive	0.750319	-0.0898883	0	18.9032	18.9931	18.2536	18.4931	19.5218	19.727	18.8884	18.9295	19.3578	19.3628	19.1898	19.255	18.1372	18.2231	18.9128	18.8053	18.6097	18.824	19.7954	19.5654	18.7426	18.8542	18.7577	18.5365	20.6041	20.7428	17.9283	18.0879	19.4913	19.5277	17.1378	17.721	18.2387	18.1241	19.2641	19.1394	20.3993	20.9219	19.3378	19.4144	19.5612	19.4673	18.1776	18.3392	18.0411
PC(0:0_16:0)_A	Positive	0.750319	-0.101983	0	21.0044	21.1063	21.1161	21.1901	21.0524	21.2394	21.6617	21.7883	21.1881	21.5899	20.9027	21.2539	21.11	21.055	20.7923	20.6869	21.1388	21.232	20.696	20.7748	21.0423	20.9522	20.7146	20.5692	21.4968	21.7157	21.4525	21.3157	21.5977	21.5499	21.0676	21.1816	20.7272	20.9576	21.0447	21.4385	20.9776	21.3374	20.207	20.3341	20.9809	20.7151	20.7713	21.2389	20.4519
PC(17:1_20:4)	Positive	0.750319	-0.0648356	0	17.2737	17.3385	17.2065	17.4108	16.9795	16.9095	17.7457	17.81	17.128	17.0857	16.8464	17.187	17.7376	17.8363	17.1484	17.1006	16.9677	17.0528	16.4516	16.4477	16.6339	16.7472	17.4809	17.7277	16.8133	16.7565	17.0179	16.8925	17.7151	17.8774	17.7854	17.7686	17.3544	17.3119	17.3837	17.6777	17.364	17.5481	17.8748	17.6561	17.5543	17.5719	17.114	17.3916	17.5266
PC(20:3_0:0)_A	Positive	0.750319	-0.154022	0	16.3531	16.5071	16.361	16.5828	16.1904	16.5481	17.0222	16.9567	16.5746	16.5348	17.0071	16.7199	16.7057	16.8563	15.7393	16.3773	16.6254	16.738	16.0889	16.0446	16.0422	16.0488	16.333	16.56	16.1479	16.0235	17.0166	17.0202	17.0264	17.1085	16.8057	16.5592	16.2301	16.6047	16.6264	17.0704	15.6096	16.1502	15.3397	16.234	15.954	16.4992	16.611	16.3086	15.7737
TG(48:0)	Positive	0.750319	0.331885	0	18.0864	17.7545	18.5224	18.191	18.0167	18.3866	17.7051	18.0123	17.5417	18.1946	19.144	18.0135	18.6748	18.4745	17.9077	16.7654	17.4509	17.2969	18.244	15.9828	18.9405	18.3463	18.6918	18.6663	19.2204	18.951	18.8582	18.3796	16.6105	15.5294	18.3084	18.2487	18.7949	18.4679	16.502	15.4909	17.7042	17.6877	17.6271	17.7221	18.0492	17.9691	16.5566	17.8463	17.4317
TG(56:4)_B	Positive	0.750319	-0.110052	0	17.2169	17.3269	16.4236	16.4899	18.3317	18.3704	17.3909	17.5159	17.2804	17.226	16.2767	16.1544	17.8219	17.8642	18.0723	17.9544	16.0683	16.1368	17.4024	17.4784	17.8159	18.2709	16.2777	16.3908	16.9538	16.849	17.3189	17.446	17.4765	17.577	17.0947	17.3808	16.6807	16.5447	17.458	17.527	16.988	17.6205	17.233	16.9595	17.6478	17.7692	16.8589	16.8371	17.5257
carnitine(12:0)	Positive	0.785731	-0.235769	0	13.5889	13.8247	13.5739	14.1156	12.0482	12.2753	13.7268	13.4015	14.3507	14.6089	12.6083	12.8769	14.9251	15.2404	13.5801	14.2751	12.7259	13.2737	13.2726	13.0666	12.8393	12.4583	14.1842	13.7021	14.64	14.732	14.5687	13.7141	13.8197	13.7821	12.9497	12.5446	13.9985	14.2779	12.1958	12.3285	13.3182	13.9545	12.9853	14.4537	14.1408	14.7007	12.9801	14.4129	13.4271
carnitine(16:0)	Positive	0.785731	-0.07994	0	16.2545	16.3345	16.8944	16.9187	15.5603	15.6886	16.6885	16.6003	16.8131	16.824	15.8017	15.9155	16.3661	16.5026	16.3608	16.3673	15.4632	15.7648	16.1299	15.9779	16.046	15.6969	16.4256	16.2677	16.7371	16.8825	16.3968	16.0736	16.0911	16.2674	16.0276	15.9159	16.2313	16.5618	15.8989	16.1463	16.3257	16.3445	15.6274	15.6548	16.2677	16.628	16.0337	17.1638	16.2091
Cer(d18:1/24:0)	Positive	0.785731	-0.0479003	0	19.51	19.5579	19.8219	19.9712	19.0669	19.1331	19.7218	19.5876	19.6189	19.4936	19.3467	19.4207	18.6268	18.8394	19.6893	19.3814	19.405	19.714	20.0438	19.841	19.6584	19.7417	19.3662	19.4692	19.3251	19.7336	19.2199	19.1776	20.1481	20.4342	19.4374	19.2261	19.8742	19.6175	19.8307	20.034	19.5754	19.3845	19.7068	19.6343	19.8547	19.9707	18.8215	19.6343	19.2819
PC(0:0_18:1)_A	Positive	0.785731	-0.0574979	0	18.8594	18.9169	19.031	19.1379	18.5148	18.851	19.907	19.8986	19.0768	19.415	19.0572	18.7617	18.9886	18.942	18.4299	18.3392	19.4211	19.5312	18.3489	18.2158	18.7611	18.9419	18.7877	18.9466	18.5948	18.6074	19.5648	19.3581	19.4608	19.6241	19.2371	19.1873	18.5149	18.6046	18.599	18.9057	18.6092	18.6563	17.8501	18.1565	18.7845	18.7926	19.1854	19.3042	18.7835
PC(0:0_20:4)	Positive	0.785731	-0.106017	0	21.6216	21.7277	21.2233	21.5012	20.963	21.2988	22.7729	22.7308	22.0328	22.2898	22.1629	22.2831	21.6476	21.6381	20.6944	21.1501	21.9542	21.8025	20.4642	20.7871	21.2158	21.3454	21.5646	21.4962	21.5074	21.5778	22.1524	22.2242	22.5222	22.7563	22.2904	22.2956	21.3481	21.4833	21.5234	21.3868	21.8503	21.8059	20.2748	20.8201	22.0425	21.9675	21.6091	22.3332	21.2884
PC(14:0_16:0)	Positive	0.785731	0.0626706	0	20.2087	20.1461	20.1667	20.1752	20.7025	20.4604	19.4797	19.5716	19.7974	19.6982	19.9069	19.9003	20.0697	20.0865	20.4289	20.5993	19.9574	20.1468	20.2407	20.0535	20.4584	20.4853	20.2868	20.4442	19.1607	19.261	20.4662	20.3428	19.6514	19.6804	20.2171	20.0222	20.9702	20.9189	19.9087	20.1756	18.88	18.9251	20.3104	20.1049	19.6686	19.7642	21.1835	19.8351	20.3819
PC(14:0_16:1)	Positive	0.785731	0.130189	0	16.3547	16.2245	15.9276	16.1967	17.007	16.9356	15.0629	14.8976	15.6797	15.3965	15.437	15.4156	16.1665	16.2738	17.2237	17.2483	15.3662	15.859	16.2121	16.1975	16.4005	16.3557	15.6791	15.4386	14.8363	14.6339	16.2696	16.1906	15.1235	15.2724	16.5494	16.4114	18.3962	18.0322	16.7209	16.9758	14.2471	13.9207	17.5317	17.3622	15.8835	15.9007	17.8754	15.6473	17.0969
PC(14:0_18:1);PC(16:0_16:1)	Positive	0.785731	0.0465874	0	22.5611	22.5145	22.168	22.288	23.2611	23.1171	21.6998	21.592	22.2084	22.163	21.5499	21.5807	22.5405	22.6222	23.3294	23.1476	21.7709	21.8963	22.529	22.3862	22.6441	22.5975	22.0701	21.9569	21.4514	21.6036	22.3648	22.3286	21.7091	21.7843	22.8674	22.8418	23.8773	23.6362	22.8302	22.8947	21.5783	21.6785	22.8326	22.8774	22.6013	22.6248	23.3912	22.4738	23.1291
PC(14:0_18:2)	Positive	0.785731	0.0712451	0	20.6875	20.6163	20.3169	20.3644	20.4535	20.5485	19.9752	19.8486	20.5649	20.4127	20.5433	20.7752	20.2081	20.0416	21.2893	21.0975	20.6799	20.7486	21.1545	20.9406	20.5967	20.4472	20.6428	20.4479	20.4585	20.4605	19.9807	20.0335	20.6073	20.5982	20.604	20.3774	21.9218	21.7232	21.0062	21.0862	19.797	19.7612	21.7191	21.5951	20.201	20.4428	20.996	20.1225	20.3832
PC(15:0_16:0)	Positive	0.785731	0.0633278	0	18.0098	17.9464	18.5098	18.5045	18.0772	17.9117	17.7391	17.7655	17.7393	17.4993	17.7641	17.8547	17.7802	17.9526	18.2611	18.2616	17.5581	17.5845	18.1625	17.7434	18.1703	17.8702	18.7938	18.6696	17.5338	17.4791	17.9544	18.0813	17.6759	17.6242	18.0181	17.7899	17.7044	17.6946	17.2941	17.4611	17.7235	17.7419	18.0741	18.1953	17.9274	17.9281	18.4782	17.7048	17.9231
PC(15:0_20:3)	Positive	0.785731	0.0401687	0	18.4119	18.3717	18.5801	18.557	18.2734	18.1729	18.3831	18.1897	18.1906	18.169	18.3407	18.457	18.7078	18.8357	18.9834	18.7681	18.5007	18.5566	18.5264	18.488	18.0746	18.1599	18.8843	18.8281	17.8015	17.7051	18.1783	18.1101	18.5573	18.6321	18.4161	18.2816	18.1979	17.8984	18.6343	18.7099	18.1002	18.2296	19.1275	19.1161	18.4617	18.4987	18.0404	17.5372	18.2689
PC(15:0_20:4)	Positive	0.785731	-0.0300772	0	19.5275	19.5575	19.4222	19.5934	19.3765	19.3661	19.8238	19.6343	19.4662	19.3342	19.5339	19.6914	19.6153	19.6343	19.6056	19.57	19.3063	19.4231	18.8264	18.5722	19.3807	19.2193	20.0184	20.0854	18.5197	18.8305	19.1145	19.1157	19.9073	19.9842	19.917	19.7966	19.4295	19.3563	18.6627	18.9575	19.6811	19.884	20.1664	20.0569	19.8747	19.9253	19.3902	19.4159	19.4587
PC(15:0_22:6)	Positive	0.785731	-0.0472855	0	18.6377	18.685	19.3973	19.5575	18.6354	18.6937	18.0793	17.936	18.5764	18.5634	18.5947	18.7422	18.8512	18.6994	19.3461	19.3103	18.5223	18.6334	18.787	18.6634	17.2958	17.4981	19.5932	19.6854	18.9251	18.9481	18.6077	18.6378	18.2305	18.2221	18.4147	18.3902	18.1202	17.9458	17.4624	17.5606	18.6511	18.6503	19.9558	19.8769	18.823	18.9383	18.2326	18.988	19.5015
PC(16:0_17:0)	Positive	0.785731	0.0462169	0	18.0818	18.0355	18.6549	18.4844	18.3779	18.3525	18.1814	18.1993	17.4989	17.4225	17.691	17.8432	18.7048	18.5932	18.6937	18.4733	18.0256	17.9899	18.2245	18.0641	18.3533	18.1517	18.4666	18.4633	17.1247	17.2277	18.006	17.9779	17.4932	17.8406	18.1942	18.0796	17.8026	17.5315	18.0328	18.0257	17.2968	17.5168	18.0719	18.1218	18.1301	17.9813	18.6043	17.9568	18.7181
PC(16:0_17:1);PC(15:0_18:1)	Positive	0.785731	0.0385049	0	20.3659	20.3274	20.7225	20.6334	20.6347	20.5731	20.4969	20.4569	19.894	19.9385	19.7725	19.7249	20.6719	20.6878	20.7092	20.7119	20.0442	20.1897	20.164	19.9598	20.4044	20.3717	20.665	20.7747	19.5225	19.4624	20.2178	20.1793	20.408	20.3862	20.7113	20.5222	20.511	20.2845	19.9582	20.1375	19.8956	19.8805	20.4792	20.473	20.3319	20.4394	20.6241	20.0692	20.3359
PC(16:0_18:0)	Positive	0.785731	-0.0216823	0	21.111	21.1327	21.3474	21.3483	20.8939	20.895	21.2173	21.2	21.0848	21.0726	20.8966	21.0684	21.1685	21.0671	21.1138	21.1263	21.0315	21.0956	21.1853	21.087	20.9602	20.9425	21.2944	21.3978	21.1958	21.1616	21.226	21.1405	21.4961	21.6471	21.3388	21.2006	21.2912	21.1016	21.523	21.5286	20.9104	21.0566	20.8954	20.8024	20.7863	20.9327	21.0071	21.1985	20.753
PC(16:0_20:4)_A	Positive	0.785731	0.0328264	0	20.1433	20.1105	19.8838	19.8671	20.2308	20.2098	19.6343	19.7154	20.0627	20.0393	20.1669	20.3693	20.1831	20.2775	20.2816	20.1637	20.9343	21.0724	20.5603	20.2964	20.2497	20.286	19.8752	19.9832	19.7996	19.8006	20.1637	20.0224	19.9018	19.9889	20.0238	19.9257	20.8104	20.7015	20.6784	20.7931	19.4426	19.5556	20.1081	20.048	19.8129	19.7745	20.4452	19.7886	20.3738
PC(16:0_20:4)_B	Positive	0.785731	0.0328811	0	19.7266	19.6937	19.4086	19.5035	19.6819	19.6282	19.7429	19.9283	19.3864	19.3824	19.6871	19.7025	20.0973	20.2801	19.7198	19.5802	19.7944	19.9802	19.6492	19.4563	19.7712	19.6105	19.6366	19.5511	19.2129	19.1931	19.4954	19.5346	19.7917	19.9025	19.8914	19.7363	20.3467	20.241	20.2531	20.1673	19.2035	19.3664	19.8805	19.8383	19.797	19.7068	20.0478	19.3272	19.751
PC(16:0_20:5)	Positive	0.785731	-0.0581638	0	23.3151	23.3732	23.9559	23.9658	23.2988	23.3471	22.7026	22.6035	23.7342	23.8094	23.082	23.1365	23.2446	23.2633	23.3682	23.1861	23.8819	24.0483	23.1674	22.8873	23.3172	23.2727	23.0879	23.1651	23.721	23.6889	23.0929	23.1717	22.229	22.4107	23.495	23.4085	24.1332	23.9766	22.7269	22.7857	23.0584	23.2448	23.411	23.4548	22.8393	22.9308	23.7445	24.9652	24.4992
PC(16:1_0:0)	Positive	0.785731	0.0706012	0	18.9409	18.8703	18.6904	18.8278	19.1191	19.0708	19.0343	19.0935	19.1684	19.1425	18.5034	18.2666	19.0102	19.0088	19.0264	18.6809	18.3537	18.5705	18.2579	17.9808	18.7117	18.5267	18.5581	18.1598	18.6544	18.5368	18.9761	18.5944	18.8037	18.7878	19.2261	19.2079	19.1637	19.3196	19.3115	19.4919	18.7898	18.7818	19.0506	19.0168	18.8905	18.8359	19.3709	18.8172	19.3479
PC(16:1/16:1)	Positive	0.785731	0.0865475	0	15.7187	15.6321	15.4426	15.6105	16.4242	16.2334	14.3518	14.1033	15.5511	15.6368	14.4219	14.3326	15.8127	15.9594	16.5812	16.5778	14.1536	14.0918	15.1972	15.076	15.1931	15.1907	14.5386	14.7688	14.0198	14.1371	14.9138	14.7843	14.0265	14.3962	16.2708	16.1103	17.5677	17.2879	16.6469	16.8459	14.8296	14.9259	17.254	17.1899	15.6014	15.6456	17.1678	15.0759	17.0481
PC(16:1_18:1)	Positive	0.785731	0.0559558	0	20.2554	20.1995	20.5493	20.5504	19.7393	19.7666	20.2094	20.2651	20.2244	20.1961	19.6996	19.6903	20.4207	20.4514	20.4187	20.2633	20.1944	20.3699	20.1209	19.9953	20.0596	20.2	20.3066	20.2663	19.7038	19.5523	19.8957	19.7086	20.2451	20.2027	20.6354	20.4784	20.5782	20.4244	20.5621	20.7399	20.1339	20.2322	20.8004	20.912	20.1372	20.1772	20.6404	19.5197	20.5861
PC(16:1_18:2)	Positive	0.785731	0.0298113	0	21.3155	21.2857	20.9906	21.1028	20.6168	20.567	20.82	20.7589	21.5214	21.4347	20.7446	20.84	20.9081	20.9743	21.7071	21.544	20.9191	20.9419	21.2226	21.1083	20.8223	20.7205	21.1615	21.1604	21.4937	21.4468	20.4334	20.2661	21.2966	21.5362	21.4812	21.3217	22.1154	22.0049	21.8739	21.9617	21.8278	21.8517	22.2754	22.2489	21.4875	21.4553	21.3728	20.9957	21.0871
PC(16:1_22:6)	Positive	0.785731	-0.0359639	0	18.1382	18.1742	18.5898	18.6628	17.7687	17.6916	17.71	17.4062	18.74	18.6755	17.6758	17.7689	18.3381	18.4585	18.7608	18.5437	17.4894	17.4587	17.6332	17.5267	16.6865	16.8424	18.0676	18.0864	18.1703	18.3916	17.8186	17.7297	17.4212	17.4998	18.1127	18.1648	18.8184	18.5282	18.1391	18.4467	18.2935	18.5362	19.9072	19.87	18.237	18.2928	18.1795	18.7321	19.5143
PC(17:0_20:4)_B	Positive	0.785731	-0.0551951	0	21.2324	21.2876	21.2267	21.204	20.6025	20.5986	22.0248	22.0223	21.407	21.3981	21.2456	21.2949	21.2588	21.3917	20.9539	20.855	21.4309	21.4907	20.2586	20.1911	20.8402	20.7485	21.6569	21.7702	21.1181	21.1536	21.3062	21.2412	21.919	22.1042	21.5934	21.5053	20.8504	20.8531	20.5259	20.5444	21.8999	21.9554	21.4137	21.5565	21.7395	21.7907	20.3854	21.5233	21.0653
PC(17:0_20:5)_A	Positive	0.785731	-0.0388242	0	17.1065	17.1454	18.4517	18.4646	17.1568	17.1917	16.9022	16.7395	17.2988	17.0445	16.5985	16.8101	17.6655	17.6803	17.2972	17.1719	18.2345	18.2397	16.7912	16.6133	16.5825	16.5535	16.9224	16.9393	16.7095	16.795	16.8666	16.7921	16.2592	16.2449	17.5392	17.4886	17.1907	17.1589	16.4753	16.764	16.7162	16.8411	17.5206	17.535	16.566	16.5593	18.3669	19.2616	19.3252
PC(17:0_22:5)	Positive	0.785731	-0.0453508	0	18.0195	18.0648	18.4089	18.678	17.7761	17.8039	18.6788	18.5131	18.1066	17.9463	17.955	18.115	18.1612	18.2549	17.8479	17.8009	18.0285	17.963	17.4687	17.3458	17.6837	17.6359	18.6472	18.7363	18.2099	18.0758	18.1634	18.0511	18.4319	18.5059	18.2294	18.1669	17.4656	17.2633	17.8313	17.9611	18.1567	18.3849	18.1623	18.1507	18.1662	18.246	17.4555	18.3347	17.9331
PC(17:0_22:6)	Positive	0.785731	-0.0622349	0	19.2744	19.3366	20.1684	20.2867	19.0896	18.9513	19.3707	19.4173	19.5824	19.4975	19.2478	19.3476	19.4247	19.5458	19.4947	19.4202	19.1194	19.2673	19.0621	18.8785	18.239	18.0528	20.157	20.163	20.0232	19.9253	19.8515	19.7998	19.0889	19.2633	19.4022	19.2828	18.4717	18.2882	17.8244	17.969	19.7679	19.7275	20.0475	20.1079	19.5231	19.5669	18.4427	20.0106	19.7766
PC(18:0_20:3)_B	Positive	0.785731	0.0538371	0	20.1826	20.1287	20.2486	20.2845	20.2985	20.1744	19.9673	19.8976	19.9707	19.9193	19.4795	19.5286	21.0685	21.0052	19.9021	19.6692	20.141	20.2649	19.3923	19.2618	19.7621	19.8319	19.8763	20.0311	19.0349	19.0745	21.1402	21.021	20.7648	20.7643	20.6152	20.534	20.5388	20.4393	21.1772	21.2616	18.7865	18.9042	19.4729	19.3977	19.7098	19.7198	21.4159	20.2868	21.0936
PC(18:0_20:4)	Positive	0.785731	-0.044741	0	25.7682	25.813	25.5328	25.4706	25.1867	25.2347	25.7009	25.9395	26.0599	26.1861	25.8103	25.9166	25.5567	25.5213	25.5842	25.5256	25.7217	25.9045	25.2785	24.9755	25.7245	25.6256	25.9418	26.0868	25.9299	25.9093	26.094	26.0191	26.063	26.2791	26.1035	25.9496	26.0449	25.9903	25.519	25.4753	26.1576	26.2491	25.5439	25.6197	26.0409	26.0312	25.2875	25.9817	25.5356
PC(18:0_22:3);PC(20:0_20:3)	Positive	0.785731	0.048749	0	16.866	16.8173	16.8244	16.8202	16.1908	16.3691	16.5959	16.4586	17.2354	17.1412	16.7726	16.7773	16.3267	16.4686	16.5762	16.2247	18.1278	18.1596	16.7969	16.5722	16.7956	16.6212	17.293	17.2199	16.1922	15.9733	17.5074	17.2905	17.4578	17.5258	16.8748	16.806	16.9273	16.7836	17.5887	17.6647	16.0411	16.3599	16.8255	16.7922	16.6492	16.779	16.5468	16.2792	16.6113
PC(18:0_22:5)_B	Positive	0.785731	0.0457965	0	20.6921	20.6463	19.9494	20.028	20.7919	20.9162	20.4328	20.2639	20.5321	20.7069	20.5287	20.6285	19.9454	20.0642	20.8783	20.5944	20.2781	20.4895	20.673	20.3108	20.531	20.4533	20.8454	20.9085	19.4907	19.1846	21.0388	20.869	21.6221	21.5092	20.7656	20.6002	21.0129	20.8517	21.1583	21.2236	20.1436	20.2489	20.2447	20.1116	21.2976	21.4277	20.4118	19.8019	20.4695
PC(18:1/18:1)	Positive	0.785731	0.0303873	0	22.8411	22.8108	23.5595	23.3808	21.926	22.0827	23.4431	23.6252	23.2058	23.3263	22.5329	22.5529	22.777	22.8348	22.6165	22.5164	23.6316	23.5599	22.4633	22.2018	22.9356	22.7593	23.2274	23.3477	22.4898	22.4778	22.8383	22.7199	23.4438	23.5289	23.1636	23.0455	22.9376	22.7535	22.8858	22.8548	23.0302	23.0906	22.4868	22.6137	22.8626	22.879	23.1263	22.8116	22.6591
PC(18:1_18:2)	Positive	0.785731	0.02188	0	24.2778	24.2559	24.5219	24.5373	23.5191	23.6476	24.5293	24.6684	24.6449	24.6289	24.5348	24.4099	23.9693	23.9414	24.1479	24.0536	24.7217	24.9446	24.414	24.2217	24.3989	24.2798	24.6829	24.7121	24.6503	24.5976	24.0023	23.8739	24.8463	24.9139	24.3617	24.2241	24.5527	24.3544	24.2973	24.3565	24.7253	24.7349	24.0639	24.0986	24.1471	24.1158	24.1758	24.1801	23.3669
PC(18:1_20:4)_B	Positive	0.785731	-0.0264973	0	21.6728	21.6993	21.6718	21.7446	20.9097	20.9365	22.3736	22.4249	21.1492	21.3405	22.164	22.1422	21.8812	21.8916	21.2266	21.0725	21.7279	21.9616	21.0015	20.7076	21.8205	21.6927	21.9764	22.0045	20.9947	20.9479	22.4277	22.3256	22.3074	22.4204	22.5076	22.4419	21.4144	21.3579	21.3552	21.3666	22.0215	22.0168	21.7077	21.7744	21.7596	21.8467	20.8376	21.1959	21.32
PC(18:1_22:6)_A;PC(18:2_22:5)	Positive	0.785731	-0.036412	0	21.027	21.0634	21.7179	21.886	20.2883	20.256	21.2098	21.1897	21.4016	21.3877	21.2405	21.3834	21.0636	21.1262	20.9004	20.721	21.235	21.3017	20.4763	20.2899	19.7261	19.6346	21.6253	21.7191	21.6462	21.6692	21.3641	21.3413	20.9174	21.0495	21.3575	21.1671	20.6625	20.489	20.7288	20.7756	21.5175	21.674	21.5628	21.5994	21.1689	21.3444	20.8566	21.66	21.3048
PC(18:2/18:2)	Positive	0.785731	0.0747937	0	22.907	22.8322	23.021	23.0311	22.7757	22.8217	23.4944	23.5741	22.9881	22.8296	23.3351	23.3224	22.4631	22.2231	22.5327	22.6364	23.3015	23.3715	23.6575	23.604	23.2824	23.267	23.0803	23.0885	23.9334	23.8558	22.6662	22.3928	23.8907	23.982	22.5855	22.5317	23.2551	23.0474	23.1993	23.1577	22.9406	22.9404	22.5868	22.5305	22.5526	22.4416	23.1595	22.3868	20.939
PC(18:2_18:3)	Positive	0.785731	0.0507143	0	17.729	17.6783	17.6106	17.624	17.8346	17.8849	18.0194	17.9561	18.2621	18.0518	18.7603	18.7879	16.3138	16.2113	17.2583	17.2685	18.5649	18.9027	18.5714	18.7712	18.0497	18.1985	18.0392	17.8871	19.2323	19.1213	16.504	16.2349	18.4912	18.5668	17.526	17.5172	17.975	17.9042	17.5767	17.5816	18.785	18.8579	18.3139	18.2654	17.5001	17.2785	17.7271	17.2741	15.3242
PC(18:2_19:0)	Positive	0.785731	0.0481158	0	19.3296	19.2815	19.6232	19.6343	18.9538	18.9528	19.6732	19.6934	19.3606	19.3318	19.3984	19.426	18.8258	18.7904	19.1019	19.0687	19.976	20.1535	19.6906	19.5946	18.9394	18.8269	19.9739	19.9559	19.5939	19.3664	19.2965	19.107	19.6343	19.8107	19.0799	19.0261	19.4053	19.2198	19.6343	19.642	19.2479	19.4191	19.3811	19.2618	18.9762	18.9748	19.559	18.9308	18.5523
PC(18:2_20:4)_A	Positive	0.785731	0.0367349	0	21.6951	21.6584	21.5012	21.5655	21.3269	21.3972	22.2184	22.2161	21.8428	21.7928	21.8682	22.0118	21.7145	21.623	21.5812	21.3742	21.4599	21.551	21.3597	21.2054	21.7952	21.7877	21.9765	21.9132	22.2115	22.0512	21.4966	21.4847	22.4079	22.5867	21.8165	21.661	22.0842	21.9804	21.8639	21.9364	21.9918	21.9564	21.3318	21.3742	21.747	21.7027	21.5475	21.0789	20.3749
PC(18:2_20:4)_B;PC(18:1_20:5)_A	Positive	0.785731	-0.0546487	0	20.0484	20.1031	20.8907	21.1085	19.6343	19.5588	19.9028	19.8472	20.7022	20.6234	19.9354	19.9967	20.2113	20.2815	19.7518	19.6632	20.9652	21.094	19.2143	19.0348	19.7402	19.8021	19.9983	19.9409	20.1136	20.0793	19.7657	19.6646	19.4428	19.659	20.4826	20.3243	20.5468	20.4218	19.6913	19.8974	19.7833	19.9863	20.0729	20.1789	19.638	19.6742	20.8108	21.796	21.5908
PC(19:1_0:0)	Positive	0.785731	-0.0542004	0	13.5522	13.6064	14.1333	14.454	13.058	13.6652	14.8697	14.6245	14.1853	14.2457	13.8446	13.7198	14.2969	14.224	12.7873	12.9635	13.8267	14.1786	12.8055	13.0817	13.1606	12.6527	13.7591	13.4352	13.6312	13.4617	13.8661	13.5824	14.1753	14.4153	13.9435	13.9445	12.9019	13.2581	13.8786	14.2307	13.2061	13.4588	12.8537	12.7915	13.3908	13.1758	13.2861	13.7256	13.5228
PC(20:0_0:0)	Positive	0.785731	0.0769175	0	15.3199	15.243	15.8047	15.3582	14.7266	15.0641	15.9173	15.5014	15.7446	15.8948	15.2457	15.4871	14.7391	14.5847	14.4156	14.1516	16.2135	16.7095	15.5302	15.047	15.3632	15.4218	15.6873	15.4218	15.5426	15.5889	16.2698	16.081	16.381	16.4837	15.3371	15.0151	15.0326	14.9372	15.7535	15.7738	15.2048	15.0105	14.7404	14.5852	15.4612	14.8454	14.5035	14.6609	14.7249
PC(20:2_0:0)	Positive	0.785731	-0.0505745	0	16.4028	16.4533	16.2114	16.2884	15.7984	15.8006	17.1324	17.249	16.881	17.1324	16.8472	17.1284	16.8194	16.8167	15.7664	16.0201	16.6138	17.0958	16.1148	16.4972	15.84	15.7552	16.3509	16.2784	16.8441	16.6485	16.5374	16.3727	17.3089	17.4601	16.8062	16.7057	15.9999	16.1691	16.9777	17.0372	16.1768	16.3767	15.8223	15.7347	16.3832	15.9816	16.5073	16.5195	15.4035
PC(20:3_0:0)_B	Positive	0.785731	-0.100092	0	19.6594	19.7595	19.4254	19.5907	19.4199	19.6343	20.1951	20.4483	20.0943	20.1616	19.9356	20.3893	19.9371	19.982	19.1312	19.4626	20.1815	20.2469	19.2438	19.5068	19.442	19.2568	19.3995	19.1342	19.3685	19.469	20.378	20.3044	20.5185	20.6939	20.0548	20.0323	19.2593	19.6065	19.9802	20.3406	18.9759	19.2078	18.4798	19.2049	19.8941	19.5515	20.0128	19.9077	19.0943
PC(20:3_0:0)_C	Positive	0.785731	0.173453	0	15.1811	15.0076	15.2095	15.4676	15.1699	14.9392	16.1085	15.8365	15.0495	15.11	14.9879	14.698	16.381	16.2484	14.759	13.6411	15.8267	15.7747	13.8404	13.5325	14.8543	14.9092	14.8417	14.6602	13.854	13.9633	16.5115	16.0828	16.2579	16.1907	15.9149	15.4232	14.9801	14.9053	15.9271	15.9795	13.8741	13.3455	13.4099	14.1814	14.5695	14.8808	16.6499	15.0255	16.0728
PC(22:6_0:0)	Positive	0.785731	-0.0850081	0	19.4486	19.5337	20.1181	20.1506	19.5015	19.4785	19.524	19.5434	20.1981	20.0374	19.9495	19.9154	19.3674	19.4889	19.2162	19.4287	19.2558	19.6254	19.3011	19.04	18.3835	18.2567	19.6361	19.5988	19.923	19.7986	20.4155	20.1054	19.7357	19.6699	19.3812	19.4361	18.9912	19.2556	18.3051	18.5843	19.3369	19.3874	19.0617	19.4853	19.6207	19.373	19.5896	20.8897	19.9709
PC(38:7)	Positive	0.785731	-0.0277529	0	17.0978	17.1256	17.2207	17.4271	17.3157	17.2125	16.2605	16.3188	17.2863	17.1224	16.5384	16.5221	16.8825	16.9195	17.4237	17.2225	16.2817	16.338	17.2182	17.0752	16.3809	16.1861	17.9474	17.8874	17.9056	18.059	17.3616	17.3236	16.9594	17.1719	16.7587	16.7929	17.3478	17.2354	16.5982	16.9342	17.1773	17.2246	17.8539	17.9136	16.9256	16.9534	16.9238	17.1707	17.7081
PC(O-16:0_0:0);PC(O-8:0_O-8:0)	Positive	0.785731	-0.0791052	0	17.4154	17.4945	17.7554	18.0521	17.0694	17.2359	18.6323	18.3174	17.607	18.1122	17.7358	17.8551	18.1547	18.0424	16.85	16.6985	17.1495	17.3555	16.8334	16.7278	17.1772	17.2076	16.9053	17.1541	18.7254	18.7284	17.7874	17.7432	17.9845	18.2877	17.8502	17.6871	17.3058	17.5013	17.5028	17.8474	17.3411	17.5728	16.5728	16.148	17.1371	17.087	16.5303	17.4456	16.9282
PC(O-16:0_18:2)	Positive	0.785731	0.0384404	0	20.9965	20.9581	21.1042	20.9956	19.9887	19.8494	21.8004	21.8553	21.1912	21.2578	21.3234	21.3001	21.6658	21.5822	20.1557	19.9918	20.7394	20.9254	21.0191	20.9116	21.0317	20.8359	20.5829	20.7909	22.7875	22.585	20.8315	20.8084	21.34	21.4916	21.8025	21.5626	21.6326	21.5541	20.9889	21.0397	20.8668	20.9999	20.333	20.2441	20.4909	20.4704	20.6003	20.6423	19.9537
PC(O-16:0_22:4)	Positive	0.785731	0.0364794	0	20.0243	19.9878	19.6703	19.8272	19.0694	19.1612	20.5833	20.4997	20.418	20.4044	19.8849	19.9341	19.9689	19.9107	19.7005	19.4289	19.6465	19.4857	19.5495	19.4005	20.1999	20.1317	20.3573	20.2715	19.6304	19.7257	20.0203	19.9476	20.8145	20.8119	20.4155	20.3343	20.8594	20.4431	20.1891	20.2893	20.0451	20.1356	19.5617	19.5789	20.0595	20.2054	19.4582	19.2893	19.2905
PC(O-18:0_16:0)	Positive	0.785731	0.0419975	0	17.9941	17.9521	18.3966	18.5395	17.2646	17.1666	18.2003	18.0456	18.2354	17.9947	18.5098	18.4821	17.945	17.9388	18.0408	17.818	18.1825	18.2558	18.0041	17.9607	18.0094	17.784	18.037	18.2452	17.7304	17.6441	18.1006	17.9529	18.7192	18.8437	18.0331	18.0728	18.5452	18.4112	17.5836	17.8554	17.8401	17.9306	17.7775	17.3877	17.6656	17.6739	17.653	17.6234	16.9677
PC(O-18:0_18:2)	Positive	0.785731	-0.0368042	0	19.7187	19.7555	19.8699	20.0211	18.8892	18.8806	20.4063	20.4813	19.6227	19.3725	20.5735	20.6434	19.9957	20.0648	19.2676	19.2312	19.4679	19.5574	19.9988	19.8885	19.6504	19.6343	19.7107	19.7271	20.629	20.5269	19.772	19.646	20.6355	20.827	19.8611	19.596	20.431	20.4165	19.6486	19.7464	19.1005	19.4027	19.1263	19.013	19.4715	19.5737	18.9888	19.5242	18.4692
PC(O-18:0_20:3)	Positive	0.785731	-0.0264554	0	18.4233	18.4497	18.6164	18.7841	17.7515	17.7672	18.7811	18.6546	18.5719	18.4641	18.8419	18.9606	18.8159	18.8557	18.7041	18.4084	18.3414	18.5759	18.4583	18.4016	18.2013	18.2445	18.8651	18.8594	18.5283	18.4972	18.2617	18.3037	19.4654	19.6029	18.5958	18.478	18.9056	18.8422	18.5387	18.6591	17.8438	17.9672	17.9255	17.8248	17.9519	18.1178	17.9082	18.0993	17.7146
PC(O-18:0_20:4)	Positive	0.785731	-0.0388769	0	22.0934	22.1323	22.2219	22.3941	21.2145	21.3452	22.8012	22.7872	22.2149	22.1558	22.4703	22.623	22.1975	22.0841	21.9411	21.6868	21.6997	21.8059	21.6979	21.5197	22.1373	22.0129	22.2734	22.3134	22.3133	22.3422	22.1228	22.0577	22.9797	23.1798	22.4891	22.3146	22.6486	22.6575	21.7299	21.9716	21.9069	22.0827	21.4341	21.5488	21.854	21.9369	21.6072	21.9484	21.446
PC(O-18:1_20:4)	Positive	0.785731	-0.0299512	0	22.7469	22.7769	22.8933	23.1178	21.7335	21.7207	23.076	23.1191	23.2735	23.3052	22.7454	22.8404	22.939	22.886	22.2742	21.9698	22.9396	23.1045	22.2313	22.1458	22.6405	22.5931	22.9726	23.1305	23.4826	23.4399	22.7926	22.8046	23.1157	23.3174	23.622	23.5196	23.4193	23.2433	22.5089	22.5132	23.1499	23.1533	22.1774	22.2345	22.4206	22.4622	22.2501	22.7883	22.0967
SM(d18:1/16:0)_A	Positive	0.785731	-0.0425707	0	19.0905	19.1331	19.6008	19.9036	18.2849	18.2787	18.9535	18.8856	18.9745	18.8966	18.7203	18.9055	19.4697	19.3722	19.6343	19.5203	18.4744	18.4257	19.4677	19.2575	19.2646	19.2171	19.5114	19.5111	18.9851	18.9545	18.5601	18.5187	19.2318	19.3947	19.4698	19.4866	18.7213	18.6776	18.9219	19.1969	19.427	19.5895	19.4426	19.3148	19.123	19.171	18.6404	19.3546	19.3828
SM(d18:1/17:0)	Positive	0.785731	-0.0524207	0	20.1002	20.1526	20.5335	20.4423	19.6618	19.6548	20.1481	20.1173	20.2674	20.2342	19.9334	20.0148	20.3394	20.326	20.6613	20.5167	19.4138	19.6326	20.2207	19.9744	19.6961	19.5893	20.8155	20.9425	20.2259	20.2397	19.7243	19.6343	20.2384	20.3575	20.3051	20.2005	20.149	20.097	19.6299	19.7459	20.7662	20.8342	20.2519	20.2801	20.1332	20.2362	19.2571	20.3776	20.1784
SM(d18:1/18:0)	Positive	0.785731	-0.058473	0	22.7632	22.8217	22.866	22.8287	22.3571	22.376	22.6623	22.7276	22.881	22.9596	22.5235	22.6187	22.717	22.7929	23.4184	23.1345	21.9012	22.0659	22.9751	22.7697	22.5193	22.3848	23.228	23.4794	23.2695	23.1161	22.5312	22.4934	22.5828	22.8471	22.8645	22.6698	23.2013	23.0018	22.3089	22.4305	23.66	23.6045	22.9315	23.0873	22.755	22.7798	22.0613	23.1779	22.666
SM(d18:2/14:0)	Positive	0.785731	-0.0356498	0	17.3926	17.4283	17.6861	17.9243	17.0424	17.0828	17.3469	17.4296	17.5474	17.5749	16.7524	16.869	17.952	17.9616	18.1218	17.9345	16.8161	16.9997	17.2403	17.1344	16.9605	16.9936	17.4648	17.7624	17.1165	16.9202	17.2909	17.1669	17.5365	17.4664	17.2552	17.2688	17.8119	17.7298	17.7598	17.9869	17.3098	17.4428	18.3608	18.1757	16.968	16.9555	16.8878	17.3514	17.2703
SM(d18:2/16:0)_B	Positive	0.785731	-0.0710406	0	18.2256	18.2966	18.6811	18.7789	17.6303	17.5931	18.3912	18.3477	18.52	18.3363	17.7334	17.9022	18.5182	18.4653	18.7658	18.624	17.6366	17.7777	18.259	18.1728	17.7402	17.7147	18.643	18.6513	18.1699	18.3883	18.0174	18.0823	18.391	18.6804	18.4029	18.3378	18.8025	18.6287	18.3989	18.73	18.4448	18.6684	18.5924	18.562	17.801	17.8109	17.6494	18.4828	17.9088
SM(d18:2/18:1)	Positive	0.785731	-0.0514541	0	17.1379	17.1893	17.0874	17.3965	16.637	16.6361	17.2237	17.3262	17.3023	17.0102	17.1835	17.2495	17.4239	17.5644	17.6308	17.3612	16.2889	16.4344	17.4821	17.432	16.3677	16.4329	17.4794	17.4362	17.1297	17.0559	17.1516	17.0915	17.3056	17.5399	17.2623	17.1299	17.8106	17.7059	17.3194	17.4942	17.7613	17.8653	17.6902	17.6022	16.8218	16.7931	16.0722	17.1279	16.1176
SM(d18:2/20:0)	Positive	0.785731	-0.0548214	0	20.8504	20.9052	21.1958	21.2825	20.2862	20.3719	20.997	21.138	20.8561	21.0658	20.7065	20.7112	20.843	20.7532	21.3674	21.1497	20.2865	20.4144	20.8189	20.5633	20.6038	20.5675	21.6237	21.6273	21.2644	21.1493	20.9543	20.8621	21.0635	21.0963	20.8914	20.7829	20.9879	20.9447	20.8432	20.7553	21.3946	21.2975	21.1073	21.3533	20.6684	20.636	19.8422	21.2243	20.4604
SM(d18:2/22:0)_B	Positive	0.785731	-0.0744689	0	23.2569	23.3313	23.5055	23.5596	22.6989	22.5975	23.3789	23.3895	23.4002	23.388	23.071	23.2331	22.9472	22.9774	23.5022	23.3866	23.2154	23.4767	23.2855	23.1915	23.0502	23.0565	23.5903	23.5833	23.2385	23.4276	23.3101	23.2791	23.9548	24.1643	23.1637	23.1048	23.6567	23.5646	23.2654	23.3801	23.3954	23.4386	23.4695	23.5316	23.1985	23.2564	22.4732	23.4807	22.7254
TG(42:0)	Positive	0.785731	0.285809	0	17.2308	16.945	16.054	15.5	19.5519	19.1434	15.6217	15.618	14.8146	14.8894	17.4799	15.4991	18.1327	17.3613	19.0386	20.5806	15.9674	16.0356	19.3258	20.5583	17.9231	17.7279	16.7972	15.9476	15.7368	16.1557	17.6034	17.4792	14.9814	14.6858	15.9161	15.97	19.6065	19.7004	20.4109	19.98	14.0514	14.0028	16.4814	15.5504	16.0702	16.0689	19.6445	15.1622	15.6268
TG(42:1)	Positive	0.785731	0.266369	0	16.9401	16.6738	14.9468	14.5093	19.2254	19.0754	16.0807	16.3435	14.2839	14.0672	17.2852	15.3408	17.2959	16.6223	18.6603	19.9784	16.9059	16.6158	18.906	20.5336	17.7826	17.9903	15.53	14.9763	14.954	15.1984	17.1262	17.2262	15.0691	14.8179	15.9187	16.207	19.1179	18.84	19.7323	19.3595	13.6432	13.1744	16.8591	15.8129	15.735	15.7926	19.9451	14.8469	15.0995
TG(42:2)	Positive	0.785731	0.282928	0	15.9039	15.6209	13.8015	13.234	18.0772	17.9378	14.672	15.1968	13.3741	13.1413	16.9077	14.7755	16.4708	15.7397	17.4185	18.1883	16.4353	16.0244	18.4269	19.831	17.0604	17.1343	13.6691	13.273	15.5049	15.6366	15.9715	15.8275	14.3042	13.878	14.5973	15.1774	17.5464	17.3813	17.6768	17.3425	12.335	12.7979	15.679	14.4512	14.5534	14.3521	18.8876	14.2808	13.8607
TG(44:0)	Positive	0.785731	0.314353	0	18.1088	17.7944	17.3461	16.9233	20.1994	20.0796	16.2482	16.5251	15.7994	16.0713	18.2459	16.1831	18.7254	18.2552	19.804	20.861	16.8784	16.4539	19.8367	20.4574	18.9061	18.6139	17.7582	16.7845	17.1903	17.1858	18.8544	18.845	16.2716	15.8664	17.1874	17.3437	20.0038	20.0419	20.1618	19.6637	14.5188	14.4871	17.185	16.629	17.9319	17.5419	19.7707	15.9556	17.0428
TG(44:1)	Positive	0.785731	0.225043	0	18.9804	18.7553	17.4945	17.1792	21.3615	21.0829	17.9923	18.3453	16.6622	16.7599	19.1457	17.4557	19.2443	18.8339	20.6051	21.6006	18.836	18.5905	20.6447	21.9369	19.9455	19.872	17.8813	17.2322	17.2831	17.3164	19.5778	19.5949	17.1671	17.0948	17.6105	18.156	20.6381	20.3786	21.0582	20.7835	15.1521	15.3375	19.0286	18.2634	18.3194	18.2625	21.552	17.003	17.7675
TG(44:2)	Positive	0.785731	0.252527	0	18.0497	17.7972	16.3889	15.9887	19.8653	19.5378	17.2505	17.7599	15.9389	15.8045	18.9152	17.5327	18.4592	17.8734	19.4806	20.2754	18.6162	18.253	20.3914	21.541	19.1572	19.1882	16.6387	15.9837	17.2656	17.3186	18.1405	18.0659	16.7338	16.5965	16.554	17.0022	19.3776	19.1051	19.5731	19.5473	14.8282	15.0308	18.1928	17.3962	17.0539	17.0498	20.6799	16.1098	16.2012
TG(46:1)	Positive	0.785731	0.209437	0	20.6977	20.4882	19.9013	19.5723	22.3571	22.3286	19.7124	19.9491	18.9962	19.2479	20.3826	19.3725	20.7945	20.5389	21.9243	22.5347	19.7951	19.7859	21.8854	22.4912	21.5503	21.3939	19.594	19.124	19.7218	19.6343	21.5197	21.3709	19.5076	19.349	19.7841	19.9238	21.9595	21.5793	21.8052	21.727	17.9428	17.9194	20.4776	20.0767	20.7191	20.4601	22.3962	18.86	20.1816
TG(46:2)	Positive	0.785731	0.185996	0	20.2244	20.0384	19.0434	18.718	21.8245	21.6672	19.3539	19.5651	18.5145	18.708	20.5693	19.4832	20.2119	19.928	21.179	21.6912	19.9421	19.7417	21.7901	22.5114	20.8851	20.9204	18.8144	18.4205	20.4468	20.4625	20.6608	20.7423	19.4099	19.2566	18.8646	19.2602	21.2326	20.8135	21.1907	21.1804	18.0003	18.0306	20.5451	20.0488	19.6343	19.7573	21.8608	18.1632	19.1037
TG(46:3)	Positive	0.785731	0.233416	0	18.3034	18.07	16.8463	16.3494	19.3393	19.2209	17.7902	17.7419	16.7249	16.7769	19.1562	17.9832	18.2559	17.8446	19.2001	19.7935	19.37	18.9939	20.3064	21.5703	19.0722	18.9286	16.8071	16.1554	17.8543	18.0505	18.067	18.1669	17.6382	17.4463	16.8374	17.2357	19.0992	18.5606	19.4339	19.6343	16.3925	16.5396	19.05	18.563	17.5572	17.4292	20.552	16.4441	16.8536
TG(46:4)	Positive	0.785731	0.231153	0	15.9836	15.7525	14.2248	13.8876	17.1791	17.3354	14.9919	15.4611	14.2351	14.1728	17.5226	16.1397	15.9435	15.4073	16.7681	17.4018	17.4257	17.1569	18.6451	20.0054	16.9321	16.7848	14.3609	13.7032	15.9234	16.0645	15.7599	15.8228	15.37	15.1321	14.4085	14.9887	16.3131	15.8806	16.9503	16.9858	14.6537	14.8047	16.5981	15.895	15.1295	14.7534	18.6579	14.159	14.0213
TG(48:1)	Positive	0.785731	0.109796	0	22.1111	22.0013	21.8698	21.5596	23.1418	22.9168	21.5013	21.8283	21.0512	21.3885	21.7782	21.1313	22.2632	22.1124	23.058	23.1214	21.3633	21.4723	22.7489	22.7697	22.9912	22.8869	21.6987	21.202	21.6467	21.5246	22.8996	22.9019	21.3754	21.3014	21.4482	21.7053	22.765	22.5927	22.5308	22.2511	20.3745	20.6385	21.5587	21.3592	22.3904	22.7162	22.8965	20.8635	21.6635
TG(48:2)	Positive	0.785731	0.132922	0	22.1755	22.0426	21.6925	21.5375	23.2687	23.0902	21.5084	21.7222	21.311	21.4287	22.0381	21.5476	22.2778	22.2408	22.8831	22.9091	21.4246	21.5099	22.8756	22.9487	22.8298	22.7744	21.5837	21.2916	22.0544	21.9258	22.6651	22.693	21.4193	21.5048	21.259	21.4281	22.6089	22.266	22.6167	22.7174	20.7633	20.8899	22.3119	22.0924	22.2369	22.2668	23.2131	20.665	21.8007
TG(48:3)	Positive	0.785731	0.105963	0	21.4432	21.3372	20.6079	20.4698	22.3713	22.3865	20.8639	21.0113	20.7561	20.9318	21.4563	21.1786	21.2941	21.1402	22.0844	22.2624	21.1065	21.0505	22.3232	22.7697	21.8894	21.9357	20.3176	19.9255	21.5042	21.5827	21.5791	21.6069	21.1268	21.1985	20.2887	20.5611	21.7525	21.4902	22.1876	22.39	20.5282	20.562	22.2349	21.9723	21.2623	21.249	22.4038	19.6816	20.7207
TG(48:4)	Positive	0.785731	0.182272	0	19.2257	19.0434	17.913	17.6537	20.1644	20.0324	18.4497	18.4252	18.3293	18.354	20.2503	19.6927	18.4142	18.3543	19.5826	19.6343	19.2397	19.221	20.5171	21.0581	19.6343	19.7039	17.814	17.2015	20.6767	20.531	19.4055	19.4257	19.2771	19.2789	17.736	18.1091	19.4695	18.8466	19.7956	19.9589	18.4206	18.6233	20.2915	19.8215	18.6272	18.6104	20.2957	17.0777	17.7332
TG(49:1)	Positive	0.785731	0.108239	0	19.8933	19.7851	19.9337	19.8103	21.216	21.3226	19.445	19.5029	18.7129	19.1499	19.2865	18.3462	20.3523	20.232	21.0526	21.2502	18.4313	18.8236	20.5362	20.7082	20.6305	20.254	20.0034	19.5999	19.2287	19.3207	19.873	19.9538	18.9707	18.913	18.73	18.8862	20.0605	19.6343	20.2534	20.2524	18.7568	19.0866	19.5894	19.2344	20.2785	20.3532	20.9199	18.6494	19.7029
TG(49:2)	Positive	0.785731	0.10504	0	19.6014	19.4963	19.6343	19.5288	20.7206	20.5984	19.1798	19.3267	18.7351	18.9372	19.1851	18.6568	19.9436	19.7533	20.4016	20.5127	18.2427	18.3903	20.4312	20.4787	19.9982	19.94	19.6635	19.4208	19.4891	19.4973	19.499	19.4091	18.9862	18.7816	18.4846	18.6368	19.3421	19.197	19.8025	19.8253	18.8552	19.1531	19.7583	19.6371	20.0057	19.8374	20.4731	18.3032	19.203
TG(49:3)	Positive	0.785731	0.117287	0	18.2968	18.1795	18.1812	18.176	19.0681	19.0232	17.9149	17.8612	17.7986	17.857	17.8118	17.5106	18.4242	18.5161	19.1547	19.1647	17.4045	17.5297	19.0525	19.1303	18.4351	18.5367	17.8784	17.4285	17.938	17.9908	17.9215	17.9709	17.7598	17.7263	17.2655	17.1157	17.9061	17.6243	18.9454	18.9056	17.7783	17.8057	19.0425	18.9243	18.6224	18.5768	19.0047	16.8306	17.875
TG(50:0)	Positive	0.785731	0.213836	0	18.3978	18.184	19.0682	19.1487	18.3309	18.8228	19.4168	19.4517	18.9076	19.1628	19.6043	18.411	19.6343	19.4029	17.7055	15.8691	18.0886	17.9956	17.6286	14.958	19.3431	18.6199	19.3671	19.0753	20.1395	19.7943	18.9817	18.8283	16.7729	16.21	19.6294	19.0019	17.865	17.7224	15.6264	15.4686	18.3541	18.7881	18.1569	18.7285	18.1108	18.1381	16.059	18.7588	17.9658
TG(50:1)	Positive	0.785731	0.112939	0	22.7748	22.6618	22.8252	22.4196	23.2458	23.1867	22.3159	22.5273	22.1044	22.5122	22.4722	21.762	22.9145	22.7747	23.3294	23.2236	21.4771	21.7197	23.446	22.8491	23.367	23.2304	22.8115	22.7826	23.125	23.0264	23.1033	23.1511	22.1075	22.0452	22.1587	22.3477	23.345	23.0187	22.412	22.4134	22.4379	22.4516	21.8328	21.7335	23.0171	22.9976	22.948	22.1515	22.5993
TG(50:3)	Positive	0.785731	0.0493118	0	23.7612	23.7119	23.5489	23.4683	24.0253	23.9964	23.62	23.6126	23.5388	23.8454	23.5797	23.3901	23.6566	23.6873	24.1627	24.1605	23.2737	23.27	24.1367	23.9427	24.056	23.8988	23.4566	23.1675	23.9334	24.1107	23.8514	23.7646	23.6276	23.7004	23.0925	23.1211	23.8665	23.4633	23.9937	24.0675	23.6361	23.8969	23.9105	24.0621	24.0361	24.0019	23.8633	22.975	23.4455
TG(50:4)_A	Positive	0.785731	0.076237	0	22.1619	22.0857	21.5406	21.4761	22.4404	22.5586	21.9223	21.9308	21.9669	22.2178	22.6166	22.3283	21.577	21.6537	22.5102	22.5029	21.8878	21.9328	23.0126	22.9843	22.437	22.2944	21.5195	21.2628	22.9567	22.9256	22.0449	21.9982	22.4182	22.482	21.0347	21.1891	21.7849	21.5178	22.5662	22.7327	22.3634	22.4588	22.679	22.5902	22.3663	22.2581	22.4086	20.8278	21.2256
TG(50:4)_B	Positive	0.785731	0.125173	0	19.5722	19.447	18.5918	18.44	21.4479	21.4275	19.2983	19.4814	18.8473	18.8343	19.3052	19.0365	19.7986	19.5424	19.8592	19.8711	18.2825	18.2812	19.6343	19.5996	20.5796	20.6925	18.271	18.0285	18.8175	18.7724	21.0291	20.8711	19.0316	19.0856	18.867	19.0454	20.2188	19.6689	19.8955	20.2036	18.2932	18.5019	19.523	19.0262	19.8351	19.6962	20.4766	18.4492	19.0269
TG(52:1)	Positive	0.785731	0.0893585	0	22.6535	22.5641	21.8407	21.7331	23.7863	23.708	22.7414	22.8498	21.961	22.0468	21.8435	20.9523	22.8777	22.6778	23.5022	23.319	21.608	21.5987	23.368	23.2706	23.5661	23.3705	21.6938	21.7675	22.8242	22.6923	23.2172	23.1628	22.6667	22.6771	22.3275	22.462	22.5661	22.3379	22.7584	22.6766	21.7803	22.0864	22.1618	21.9182	23.1122	23.1342	23.0099	22.1849	22.6422
TG(53:1)	Positive	0.785731	0.103754	0	17.3108	17.2071	16.2383	16.3892	18.8785	18.7251	17.9859	17.9694	16.3548	16.4543	16.471	15.1966	18.0194	17.8617	18.2424	18.4911	16.4536	16.1505	18.3798	18.7642	18.144	18.1908	16.1795	15.8769	17.0195	16.9697	17.4334	17.4853	17.4695	17.2681	16.329	16.9014	16.5312	16.568	17.6627	17.5424	16.0334	15.803	17.0667	16.6824	17.7199	18.0242	17.9149	16.1735	17.2567
TG(53:5)	Positive	0.785731	-0.024318	0	18.7586	18.7829	18.2797	18.1996	18.2325	18.5356	19.1155	19.2173	18.8714	19.0949	18.9609	18.8359	18.114	18.3547	18.7487	18.736	19.2678	19.3247	19.478	19.5775	18.5232	18.5705	18.449	18.2204	19.8199	19.7593	17.8563	17.9135	19.5456	19.4337	18.0014	18.0642	17.5064	17.5543	19.2188	19.2352	20.1961	20.1999	19.3079	19.3914	19.3006	19.4127	17.7342	17.6962	18.027
TG(54:1)	Positive	0.785731	0.109369	0	19.6474	19.538	17.879	17.9945	20.8412	20.9783	20.1556	20.1569	18.6997	18.8734	19.477	17.7696	19.8479	19.7321	20.4512	20.4754	19.6914	19.3714	20.7826	21.008	21.132	21.3693	17.9821	17.8385	19.5939	19.268	19.6123	19.7027	20.6465	20.3621	19.502	19.8214	18.993	18.7853	19.7995	19.5846	18.4707	18.971	19.1549	18.4692	20.0238	20.0708	20.2027	19.1351	19.4543
TG(54:3)	Positive	0.785731	0.044658	0	23.3208	23.2761	23.0408	22.8974	23.0387	23.0902	23.9999	24.1016	23.7533	23.7601	23.4473	22.8461	22.951	23.0429	23.2622	23.0947	24.1341	24.2264	23.6684	23.4168	23.6546	23.9961	23.0823	23.0811	23.8537	23.6614	23.1099	23.1755	24.2641	24.0712	23.0705	23.2377	22.5429	22.5062	22.9807	23.0906	24.3951	23.9347	23.0255	22.9528	23.6146	23.54	23.0458	22.9236	22.6858
TG(54:4)	Positive	0.785731	0.0372332	0	23.4865	23.4493	23.1725	23.0564	23.0912	23.3008	24.0894	24.2309	23.9232	23.948	23.6894	23.4421	22.9683	22.9054	23.1519	23.1081	24.3488	24.6782	23.7006	23.4081	23.9079	24.0674	23.8293	23.6532	24.1332	23.8558	23.408	23.3213	24.3541	24.1553	23.2791	23.4512	22.6329	22.6751	23.1535	23.0675	24.5138	24.3435	23.1618	23.1413	23.6776	23.7309	23.428	22.9239	22.6601
TG(54:5)_B	Positive	0.785731	0.0419599	0	22.8876	22.8456	22.1215	21.9957	23.5254	23.4066	23.0625	23.2814	22.9518	23.1457	22.5849	22.5532	22.8239	22.6955	22.82	22.5633	22.2733	22.3115	22.4397	22.2397	23.4418	23.5457	22.4476	22.523	22.5724	22.5131	23.5907	23.4902	22.8954	23.0232	22.852	22.9261	23.0739	22.6349	22.9937	22.8947	23.102	23.1229	22.6253	22.524	23.1915	23.1737	22.843	22.55	22.6556
TG(54:6)_B	Positive	0.785731	-0.0701124	0	18.8716	18.9417	19.3592	19.5063	19.9313	19.8362	17.7077	17.5397	19.0278	19.1769	17.9191	18.0244	18.9542	18.9171	20.0483	19.4402	17.4841	17.6851	19.4026	18.7436	18.2989	18.8427	18.6924	18.6412	19.2547	19.1047	19.3074	19.4413	17.4262	17.5236	18.2199	18.3783	19.6343	19.5746	18.1065	18.019	18.5949	18.9189	18.5697	18.53	18.7571	19.0088	18.7769	19.5961	20.5678
TG(54:7)_B	Positive	0.785731	-0.0598714	0	21.1107	21.1706	20.6617	20.9195	21.9228	21.8975	20.8559	20.7837	21.7013	21.8473	21.4399	21.2427	20.5037	20.6154	20.8708	20.671	20.7381	20.8373	21.0072	20.6481	21.7445	21.6897	20.3422	20.2021	21.6886	21.8322	21.3127	21.3261	20.5269	20.6805	20.7696	20.7174	21.153	20.9874	20.7498	20.9299	21.4605	21.7599	21.0661	21.0155	20.9394	21.0081	20.7696	22.0093	21.8996
TG(54:8)	Positive	0.785731	-0.123779	0	18.1884	18.3122	17.1909	17.1698	18.6859	18.897	17.7615	17.4998	19.0472	18.9364	20.0647	19.8954	17.2132	17.1522	17.2424	17.091	18.9527	18.9359	18.6993	18.6371	18.8689	19.8735	17.4937	16.9667	20.3726	20.5471	17.345	18.1585	18.4868	18.6204	17.2385	17.1827	17.0558	17.1474	18.2315	18.1619	21.7838	22.2607	19.0327	18.9042	17.8143	17.7343	15.8969	18.0786	16.956
TG(56:5)	Positive	0.785731	-0.0580664	0	21.7374	21.7955	21.363	21.5191	21.5528	21.7557	21.759	22.0126	22.4223	22.5897	21.5709	21.5454	21.781	21.8182	21.968	21.6931	21.3793	21.6637	21.6059	21.4033	21.5837	21.7557	21.8928	21.7827	21.4991	21.7098	21.2857	21.3688	21.8005	21.7068	21.8756	21.9173	21.4579	21.228	21.9334	21.732	22.7155	23.0978	21.7795	21.7399	21.929	21.9617	21.0866	21.7202	21.8763
TG(56:6)	Positive	0.785731	-0.042893	0	22.5734	22.6163	22.3438	22.4337	22.3993	22.4211	22.8922	23.0764	22.9457	23.1189	22.3495	22.4899	22.4997	22.5573	22.5433	22.435	22.5132	22.5896	22.3287	22.0522	22.7517	22.6545	22.6053	22.7093	22.4411	22.6335	22.6297	22.6794	22.7272	22.8201	22.5856	22.5195	22.2386	22.1302	23.0067	22.7998	23.0739	23.1564	22.2132	22.2489	22.7945	22.7146	22.1463	22.8045	23.0273
TG(56:7)_A	Positive	0.785731	-0.0551964	0	22.4055	22.4607	21.8531	21.8826	22.1653	22.2862	22.7995	22.7445	22.764	22.9928	22.818	22.7456	21.934	21.9947	22.1961	22.1091	22.3327	22.4653	22.3501	22.0765	22.6129	22.6827	22.5124	22.414	23.0368	22.9812	22.32	22.2194	22.7604	22.9354	22.1736	22.1417	22.3532	22.0826	22.5063	22.537	23.2949	23.4354	22.1169	22.3081	22.8153	22.7078	21.3823	22.4727	22.2199
TG(56:7)_B	Positive	0.785731	-0.0887648	0	21.6146	21.7034	21.8972	22.0961	21.6493	21.6771	20.7771	20.886	22.4803	22.644	21.176	21.2156	21.6316	21.7189	22.261	21.7767	21.2183	21.2869	21.9785	21.2888	20.539	20.7091	21.4815	21.4865	21.7181	21.72	21.7239	21.8171	20.5806	20.7451	21.5749	21.5758	21.7689	21.8179	21.1016	20.6755	22.1756	22.4212	21.9993	21.9448	21.6254	21.707	21.0421	22.8229	23.2213
TG(56:8)	Positive	0.785731	-0.141785	0	21.6183	21.7601	21.5645	21.863	21.5573	21.7082	20.8147	20.9101	22.6636	22.795	21.5436	21.6166	21.1563	21.3181	22.1779	21.9225	21.2395	21.2302	22.2263	22.0205	20.4412	20.5734	21.3368	21.4824	22.5272	22.5285	21.3469	21.5873	20.7381	20.7519	21.4303	21.4708	21.7514	21.6041	20.8608	20.94	22.6017	22.7053	22.2654	22.2519	21.6475	21.828	20.5687	22.6039	23.0594
TG(56:9)	Positive	0.785731	-0.105275	0	19.6585	19.7638	18.9786	19.1417	19.8853	19.952	18.9498	18.8613	20.5057	20.4679	20.6346	20.5872	19.0306	19.0141	19.2841	19.015	19.541	19.5418	19.4003	19.2216	19.4586	19.8348	18.6126	18.521	20.7325	20.8093	19.5511	19.5771	19.4031	19.527	19.4589	19.4357	20.0612	19.8265	19.2258	19.2971	21.1313	21.4479	20.1958	20.1485	19.4838	19.5265	18.5311	20.6565	20.5882
TG(58:1)	Positive	0.785731	0.127625	0	15.2907	15.1631	13.5055	13.5449	18.1481	18.5418	15.6858	15.6177	14.7478	14.4556	15.4947	13.7199	14.4462	14.241	15.2379	15.0304	18.0661	17.8702	15.4867	15.6579	17.5607	16.9826	13.1452	12.4551	14.5336	13.8046	15.6855	15.854	17.4342	16.9503	13.9775	14.3729	14.3606	14.0213	14.7984	14.7943	13.8444	14.2193	14.7885	14.5711	16.8594	16.5282	16.0382	16.6053	14.3915
TG(58:10)_A	Positive	0.785731	-0.0933446	0	19.8259	19.9193	18.8719	19.1238	19.5807	19.6579	19.2044	19.0097	20.7236	20.5195	20.4527	20.4094	19.2282	19.1832	19.6846	19.2796	19.6354	19.5958	19.6685	19.6343	19.7292	19.7919	18.9779	18.8305	20.6705	20.7121	19.6343	19.6814	19.5043	19.4731	19.7248	19.8043	20.6388	20.5071	18.7608	18.7839	20.9179	21.1219	20.2585	20.1825	20.0529	20.3894	18.9233	21.2482	20.6961
TG(58:10)_B	Positive	0.785731	-0.107655	0	18.099	18.2066	17.5811	17.8044	18.9833	19.0723	17.1477	16.8768	19.2247	19.0609	17.8323	17.8798	17.61	17.7244	18.5746	18.018	17.3143	17.1927	18.0327	17.47	17.1755	17.3728	17.3595	17.5125	17.8005	18.0864	18.6121	18.8548	16.8021	17.1214	18.3623	18.3013	18.8644	18.6767	17.5065	17.3402	18.6554	18.8642	18.2875	18.2515	17.9458	18.3088	17.0599	19.5122	20.0096
TG(58:11)	Positive	0.785731	-0.133552	0	18.2767	18.4103	17.7483	18.2164	18.1695	18.315	17.0985	16.8431	19.6459	19.3349	19.5042	19.5716	17.5278	17.5441	17.7323	17.5266	18.0785	17.9276	17.9845	17.8339	18.2773	18.4917	17.1345	17.2649	18.9926	18.9212	17.8602	18.0649	17.1976	17.35	18.3677	18.3095	19.2994	19.4647	16.8624	16.8831	19.6988	19.7587	18.8527	18.5795	18.3302	18.1812	17.215	20.4205	20.1548
TG(58:12)	Positive	0.785731	-0.165091	0	15.4957	15.6608	16.7413	17.2148	15.2667	15.6057	13.3806	13.2636	18.0642	17.579	16.6222	16.8155	14.1469	14.2388	15.054	14.4832	15.4173	15.4482	14.9552	14.8786	15.485	15.6882	14.2957	14.382	16.1287	16.3102	14.9048	14.9139	13.4033	13.5592	15.2912	15.2499	16.3453	16.517	13.5458	13.4926	18.735	18.2496	15.9091	15.8531	14.9118	14.919	14.7064	18.9086	18.8055
TG(58:2)	Positive	0.785731	0.091851	0	16.1706	16.0787	14.0429	14.2858	19.882	20.22	16.2701	16.4276	16.1986	15.9363	16.2126	14.2498	14.8567	14.8624	15.7198	15.6882	20.2551	19.7874	16.2901	16.7979	18.4652	18.2431	13.5196	13.339	15.335	14.9211	16.1377	16.0466	18.7651	18.3225	14.9322	15.1551	14.8068	14.4375	15.9259	15.9465	14.8147	15.2664	15.5968	15.0042	17.7407	17.2809	17.4482	17.6684	15.5278
TG(58:3)	Positive	0.785731	0.126073	0	16.65	16.5239	14.7601	14.734	20.5759	20.7619	16.5404	16.4092	17.0372	16.8226	16.8002	14.8298	15.5065	15.3495	16.2026	16.0845	19.9304	19.6343	16.8109	17.4543	18.5543	18.6956	14.3528	14.3859	16.4966	16.314	16.039	16.0285	18.5884	18.2507	15.3004	15.6837	14.9111	14.943	16.2345	16.1622	15.861	16.5415	16.1368	15.4333	17.7909	17.3769	18.1752	17.2628	16.1698
TG(58:5)	Positive	0.785731	-0.106966	0	16.9996	17.1066	15.1353	15.2072	17.8712	17.7936	17.3875	17.476	17.121	17.2916	16.5279	16.0671	17.0601	17.2791	17.2206	17.1456	18.0003	18.1222	16.9514	17.4088	17.3121	17.5321	16.1781	16.2021	16.4063	16.3503	16.9947	16.9897	17.3813	17.4841	17.0542	17.6544	16.3484	16.2097	17.7674	17.7819	17.175	17.839	16.6372	16.2502	17.4354	17.7229	16.6327	16.08	16.829
TG(58:6)	Positive	0.785731	-0.0424758	0	19.186	19.2284	18.3728	18.3428	19.4526	19.5283	19.3851	19.4184	19.5601	19.6128	18.9529	18.6581	18.8848	19.0442	19.1948	19.0976	19.9074	20.1189	19.0051	18.977	19.1581	19.2081	18.8654	18.805	18.7624	18.9282	18.8857	18.9591	19.2814	19.3377	19.152	19.3361	18.3302	18.3005	19.5781	19.5342	19.7309	19.8938	18.9546	18.7388	19.4872	19.4545	18.3908	19.0725	19.7497
TG(58:7)	Positive	0.785731	-0.185597	0	18.4975	18.6831	18.2756	18.6214	18.346	18.6631	17.8213	17.8328	19.6919	19.6343	18.0807	18.0188	18.4674	18.7316	18.9759	18.8132	18.6244	19.4827	18.9576	18.777	17.3908	17.563	18.1411	17.9755	18.5065	18.4767	18.1272	18.2761	18.1329	18.0218	18.5174	18.7723	18.6653	18.6049	17.6289	17.5464	19.4456	19.4726	18.8616	18.9758	18.5011	18.8945	17.3756	19.6563	20.389
TG(58:8)	Positive	0.785731	-0.0748453	0	19.9766	20.0515	19.9006	20.135	19.3015	19.3285	19.604	19.7951	21.1553	21.1692	19.7416	19.8098	19.6319	19.86	20.2363	19.9551	20.5458	20.6129	20.2631	19.7804	18.9769	19.0011	19.5745	19.7627	20.2569	20.2082	19.8431	19.8659	19.3693	19.4864	20.3974	20.3191	20.0774	19.9158	19.2518	18.9063	20.8745	20.9162	20.2288	20.3355	20.1531	20.265	19.305	21.1182	21.5456
TG(58:9)	Positive	0.785731	-0.065368	0	20.6967	20.7621	20.1335	20.4827	20.2995	20.4529	20.1798	20.304	21.5872	21.6239	20.8603	20.8412	20.2193	20.269	20.7853	20.4067	21.0024	21.0759	20.4916	20.2242	20.3939	20.537	20.1721	20.3061	21.1871	20.9179	20.6751	20.654	20.2045	20.3202	20.7572	20.6872	21.2848	21.0708	19.8568	19.8258	21.7062	21.6014	20.9058	20.9233	20.9786	21.0229	19.9732	21.5028	21.6587
TG(60:12)	Positive	0.785731	-0.180792	0	17.4958	17.6766	17.4211	17.6869	17.2233	17.1494	15.8475	15.886	19.0085	18.9442	17.9902	18.0084	16.6966	16.7482	17.9159	17.5858	16.8662	16.6707	17.2978	16.9903	16.2656	16.3229	16.8476	16.8428	17.9585	18.0891	17.0054	17.0267	16.0949	16.1213	17.8072	17.6777	18.8511	18.7441	15.8722	16.0838	18.272	18.4913	18.2003	18.252	17.9526	17.7655	16.2918	20.4054	20.6043
TG(60:13)	Positive	0.785731	-0.251271	0	15.6646	15.9159	16.1331	16.6931	15.3751	15.3629	13.5983	13.576	17.9601	17.5164	16.5313	16.4672	14.7432	14.757	15.8457	15.4641	15.4826	15.2892	15.0102	15.4388	14.3619	14.6944	14.6051	14.5434	16.177	16.7006	15.3429	15.2022	13.4308	13.4738	15.6582	15.474	16.9833	16.8334	13.7029	13.8692	18.2981	18.2542	16.5181	16.4192	15.3402	15.5751	14.455	19.4554	19.6343
TG(60:2)	Positive	0.785731	0.106304	0	14.8756	14.7693	13.2958	13.1917	18.2802	18.738	15.4322	15.2578	14.9087	14.6477	14.6446	13.2452	13.4856	13.4294	14.3142	14.2645	19.123	18.6528	14.8349	15.1129	17.264	16.991	12.6069	12.0576	13.4824	13.2392	14.849	14.8798	17.2439	16.9629	13.4235	13.7118	13.7985	13.4605	14.7808	14.5454	13.7729	14.255	14.7091	14.24	16.5614	16.3658	16.0456	16.3271	14.0093
PC(15:0_0:0)	Positive	0.796091	0.0255734	0	17.6631	17.6375	17.8117	17.9076	17.915	17.7281	18.2613	18.3242	17.443	17.7894	17.8135	17.5989	18.1278	17.9191	17.8378	17.7685	17.9925	17.9329	17.4375	17.249	17.5602	17.4641	18.064	18.0464	17.7227	17.5028	17.6642	17.6384	18.0697	17.9412	17.6113	17.6543	16.692	16.6147	17.2122	17.471	17.4688	17.5176	17.7744	17.63	17.5597	17.5925	17.2207	17.1825	17.3408
TG(53:2)	Positive	0.796091	-0.0578024	0	20.6306	20.6884	20.309	20.2233	21.2714	21.0446	21.5802	21.5394	20.3168	20.632	19.6343	19.2033	20.9561	21.219	21.3785	21.2603	20.1925	20.599	20.8471	21.1754	20.7278	20.8892	20.3608	20.2271	20.3125	20.2496	20.6379	20.6274	21.1515	21.1501	20.1541	20.7139	19.2968	19.4576	21.0647	21.1239	20.3724	20.9874	20.7506	20.506	21.311	21.3305	20.8063	19.8948	20.7326
PC(16:0/16:0)	Positive	0.797025	0.0151689	0	22.6797	22.6645	22.8869	22.8691	22.2918	22.2969	22.6508	22.6823	22.6594	22.7596	22.4669	22.5233	22.2496	22.2858	22.691	22.6794	22.5759	22.6994	22.6632	22.5451	22.8364	22.6798	23.0017	23.1441	22.702	22.6104	22.6538	22.6245	22.6375	22.7598	22.6887	22.4905	23.158	23.1458	22.5565	22.6014	22.9132	22.8456	22.3223	22.3474	22.4371	22.3473	22.7339	22.6191	22.3211
TG(52:0)	Positive	0.797025	0.154092	0	16.2541	16.1	16.6296	16.6776	15.8476	16.4665	18.1078	18.2807	16.9512	16.7005	18.0419	16.3789	17.7236	17.6233	15.102	13.877	16.6386	16.5541	15.4242	13.8716	17.6377	16.6964	16.5507	16.6221	18.0154	17.5147	16.6494	16.3246	14.9827	14.0362	18.2704	17.6989	14.7863	15.0573	13.3551	13.919	16.3459	16.4818	15.8619	16.8791	15.6358	15.6092	14.3413	16.9429	15.5978
TG(52:4)	Positive	0.797025	-0.0345211	0	24.6191	24.6536	24.385	24.4155	24.2951	24.4319	24.6965	24.8671	24.6139	25.0284	24.8021	24.5761	24.2446	24.239	24.7768	24.693	24.2667	24.5125	25.0848	24.5614	24.7859	24.7077	24.6688	24.602	25.6416	25.5683	24.5562	24.4341	24.8852	24.9404	24.0839	24.157	24.3811	24.3113	24.5656	24.5438	25.2882	25.3293	24.6277	24.7402	24.9	24.977	23.8566	24.3636	23.9936
PC(17:0_20:5)_B	Positive	0.79827	-0.0670797	0	17.8672	17.9343	18.7804	18.9595	17.8259	17.7837	17.7871	17.7495	18.2186	18.1837	17.7615	17.8873	18.2781	18.2875	17.7765	17.6969	18.8494	18.8368	17.4252	17.2622	17.5505	17.3139	17.889	17.8123	17.9653	17.9893	17.7653	17.7969	17.1371	17.3583	18.2225	18.1009	17.8393	17.7182	16.908	16.8091	17.5677	17.8978	18.1848	18.1277	17.5442	17.6046	17.9473	19.7964	19.3766
Cer(d18:1/23:0)	Positive	0.798627	-0.0443961	0	17.8722	17.9166	18.212	18.4494	17.5249	17.6008	18.35	18.3981	17.7742	17.8758	17.7589	18.064	17.916	17.8222	18.1404	18.1238	17.3263	17.2938	17.9633	17.9477	17.7896	17.5856	17.838	17.8673	18.0398	18.0756	17.3508	17.4364	17.6645	18.0173	18.4284	18.3388	17.8158	17.403	18.3321	18.2893	18.0161	17.4876	18.0891	18.2009	18.158	18.2973	17.3483	18.1435	17.3831
PC(17:1_0:0)	Positive	0.802935	0.0425609	0	15.6749	15.6323	15.7282	15.8344	15.549	15.6551	16.8157	16.422	15.6847	15.8227	15.5177	15.2095	16.3547	16.3922	15.6744	15.3215	15.7344	15.8205	15.5419	15.3854	15.2315	15.5286	15.5808	15.2148	15.6124	15.2217	15.8607	15.6788	16.1413	16.3952	15.7287	15.7777	15.0888	14.9707	15.9534	16.2167	15.0922	15.5413	15.3131	15.1317	15.3891	15.5507	15.6852	15.4656	15.6998
SM(d18:2/24:0)	Positive	0.802935	-0.0359482	0	23.3672	23.4031	23.7295	23.8619	22.6531	22.7198	23.4638	23.3847	23.494	23.5728	23.1368	23.2297	22.9241	22.9157	23.548	23.3305	23.3287	23.4272	23.5439	23.3816	23.0634	23.0121	23.6968	23.7687	23.297	23.1311	23.5209	23.4341	24.1037	24.1462	23.2543	23.0952	24.0207	23.8418	23.4567	23.5809	23.387	23.4135	23.674	23.51	23.1633	23.3059	22.7733	23.6433	23.0022
TG(56:1)	Positive	0.802935	0.0900886	0	16.3429	16.2528	14.304	14.3622	19.4487	19.7474	16.6206	16.8335	15.5209	15.3647	16.9387	14.8614	15.688	15.4642	16.3476	16.4828	19.0659	18.6012	17.0445	17.3427	18.2786	18.2646	13.6202	13.7403	15.8839	15.4007	16.1595	16.4457	18.1395	17.8777	15.6601	15.8684	15.3316	15.2199	16.2042	15.6818	14.5299	15.3007	15.9418	15.1707	17.6475	17.1846	17.3333	17.4379	15.4501
PC(18:1_22:5)_A	Positive	0.810589	-0.0429535	0	18.2687	18.3116	19.0869	19.1031	17.4955	17.3945	19.2843	19.1471	18.4184	18.6563	18.5517	18.7528	18.3103	18.3152	17.6282	17.3181	18.6487	18.8845	17.3583	16.9472	18.0977	17.9613	19.1565	19.1164	18.7216	18.316	18.8285	18.6275	18.4697	18.7796	18.2457	18.3437	17.3319	17.686	18.4964	18.6397	18.6245	18.8242	17.6515	17.8304	18.4471	18.2692	17.7948	18.5616	18.6018
PC(20:1_0:0)	Positive	0.810589	0.048163	0	16.0669	16.0188	16.2431	16.2716	15.0349	15.092	17.0608	16.7293	16.8868	17.2909	16.3809	16.2895	16.3999	16.1131	15.5237	14.6955	17.2051	17.1661	15.4776	15.1255	15.4133	15.4983	16.4718	16.3205	16.2328	16.3359	16.3773	16.4508	17.0656	17.2135	16.2226	16.2748	15.1729	15.562	16.0495	16.4947	15.9088	16.0449	15.6055	15.1148	15.9293	15.8343	15.7971	16.1994	15.6182
SM(d18:2/16:0)_A	Positive	0.810589	-0.0361336	0	22.0806	22.1168	22.3886	22.5237	21.4587	21.3119	22.1241	22.2789	22.5087	22.4003	21.6623	21.7365	22.2232	22.2146	22.6663	22.3487	21.7786	21.689	22.1735	22.0061	21.7203	21.5593	22.3533	22.5708	22.3473	22.3877	21.8351	21.9479	22.3376	22.59	22.1441	21.9958	22.6419	22.4435	22.2215	22.3994	22.3962	22.5773	22.3382	22.2295	21.6227	21.6101	21.555	22.3855	21.678
TG(60:11)	Positive	0.810589	-0.0969433	0	18.3854	18.4824	18.1309	18.3862	18.2656	18.2997	17.4413	17.2253	19.877	19.7076	18.6072	18.5927	18.0374	18.0503	18.8182	18.3802	18.1282	18.0378	17.9793	17.5749	17.3151	17.1771	17.9234	18.0736	18.3184	18.487	18.1688	18.3684	17.1277	17.2992	18.89	18.8403	19.3493	19.2187	17.0728	16.9971	18.9983	19.2445	18.8021	18.8758	18.3779	18.5531	17.6469	20.5006	20.8843
PC(0:0_18:0)_B	Positive	0.818447	-0.0272848	0	23.1023	23.1296	23.379	23.3504	22.9843	23.1171	23.4741	23.4939	23.2196	23.5728	23.3767	23.2802	23.2927	23.1377	22.9724	22.8191	23.3152	23.4131	23.196	22.9366	22.6838	22.7226	23.049	22.9738	23.7253	23.6614	23.5209	23.5308	23.777	23.9404	23.1843	23.1939	22.6341	22.9197	23.3182	23.5396	23.1595	23.0716	22.4992	22.4716	22.9944	22.9439	22.5314	23.1165	22.5978
PC(16:0_20:3)_A	Positive	0.818447	0.0149126	0	24.8923	24.8774	24.7621	24.7578	24.4965	24.5221	24.7733	24.8131	24.9524	25.0179	24.8606	24.8411	24.9127	24.8402	25.1442	24.9789	24.9047	25.0949	24.9395	24.6602	24.9144	24.7455	25.0188	25.1025	24.8899	24.7811	25.0771	25.052	25.0751	25.0712	24.9053	24.8732	25.2036	25.0263	25.1152	25.2114	25.0005	24.9836	24.8999	24.9705	24.8626	24.8835	24.5202	24.6194	24.556
PC(16:1_20:5)	Positive	0.818447	-0.0336286	0	15.5345	15.5682	15.958	16.3303	15.5572	15.6036	14.7927	14.8372	16.5006	16.2534	15.0733	15.1754	15.7942	15.9253	15.8877	15.4869	15.6741	15.7552	14.4838	14.6908	15.258	15.2346	14.5767	14.3255	15.1951	15.3547	14.5528	14.3884	14.0182	14.4425	15.8954	15.912	16.5518	16.4098	15.4682	15.6925	15.4116	15.0791	16.8462	16.8478	15.1582	14.9591	16.59	17.1042	17.9674
PC(17:0_18:2)_A	Positive	0.818447	0.0156977	0	20.7628	20.7471	21.4538	21.4444	20.086	20.047	21.0177	21.166	20.3962	20.4341	20.6073	20.6912	20.9925	21.0155	21.2065	21.2168	21.0955	21.286	21.2671	21.0154	20.7218	20.5854	21.2665	21.2194	20.8257	20.6819	20.0415	20.0278	21.1484	21.2154	20.8069	20.6504	20.2564	20.1491	21.0345	21.0387	21.1715	21.1126	21.1252	21.2236	20.6823	20.6776	20.7258	20.537	20.6101
PC(18:0_22:5)_A	Positive	0.818447	-0.0280208	0	22.2864	22.3144	22.6273	22.5341	22.6058	22.6476	22.3737	22.4261	22.2605	22.3958	22.0577	22.182	21.9843	21.928	22.3609	22.1075	22.2118	22.2564	22.3421	22.1349	22.5985	22.5278	22.6451	22.766	22.7613	22.7166	22.8859	22.7823	22.2745	22.3509	22.0621	22.0845	21.9567	21.9572	22.2648	22.403	22.1646	22.2229	21.4828	21.6134	22.2276	22.2443	21.8555	22.5727	22.3713
PC(18:1_20:3)	Positive	0.818447	0.0218365	0	21.5029	21.4811	21.6997	21.6487	20.7557	20.7763	21.562	21.5032	21.8414	21.8304	21.5859	21.6188	21.7376	21.7773	21.4556	21.4795	22.1531	22.2287	21.1856	21.0355	21.1962	21.0961	21.9962	22.0325	21.2539	21.235	21.5528	21.5476	21.8529	22.0339	21.56	21.4396	21.5918	21.5205	22.2332	22.3068	21.4929	21.5925	21.5406	21.6258	21.3141	21.2937	21.4914	20.9069	21.2695
PC(18:1_22:5)_B;PC(20:2_20:4)	Positive	0.818447	-0.0228337	0	19.1853	19.2082	19.1253	19.2203	18.5338	18.5589	19.4713	19.5865	19.5601	19.5173	19.719	19.6967	19.1017	19.2203	18.6762	18.6091	19.2624	19.3472	18.8587	18.5199	19.1144	19.0692	19.7569	19.6712	19.2852	19.2522	19.5172	19.5125	19.4378	19.6289	19.4521	19.3364	19.3893	19.0876	19.1065	19.2742	19.6449	19.6057	19.0457	19.2631	19.1082	19.2764	18.4558	18.7709	18.4936
PC(O-12:0/2:0)	Positive	0.818447	0.0391157	0	14.5026	14.4635	14.4536	14.6271	14.709	14.6111	14.206	14.291	14.1093	13.8607	14.3348	14.2874	14.6945	14.4152	14.554	14.7242	14.454	14.362	14.1728	13.6945	14.9397	14.3906	14.4615	14.3863	14.0841	14.2075	14.9105	14.8653	14.2795	14.2936	14.4744	14.6885	14.6995	14.7836	14.7144	14.945	13.2804	13.6827	14.7404	14.5217	13.971	14.1686	14.919	14.4757	14.594
PC(O-16:0/20:4)	Positive	0.818447	-0.024225	0	22.9039	22.9281	22.9372	23.0438	22.0737	22.0537	23.2653	23.2343	23.5277	23.4987	23.0144	23.0127	23.362	23.2753	22.4935	22.2535	22.3454	22.5213	22.2565	22.0915	22.7538	22.7141	22.6976	22.7704	23.9177	23.7939	22.8123	22.8352	23.2583	23.4617	24.0026	23.9741	23.6057	23.5274	22.7622	22.8548	23.022	23.1131	22.1797	22.2485	22.6087	22.7198	22.2819	22.9112	22.3895
PC(O-16:0/22:6)	Positive	0.818447	-0.0400929	0	19.784	19.8241	20.4431	20.4281	18.8722	18.8828	19.7993	19.8448	20.3847	20.5763	20.0988	20.2607	20.0697	20.0576	19.6693	19.4707	19.1226	19.4121	19.5796	19.3	18.8752	18.7346	19.7725	20.0681	21.4825	21.2051	20.2922	20.0532	19.5422	19.6072	20.634	20.4977	20.2454	20.0822	18.5436	18.7493	19.8226	19.7766	19.7587	19.7263	19.186	19.3147	19.2229	20.366	19.9134
PC(O-18:1/0:0)_A	Positive	0.818447	-0.0416885	0	16.722	16.7637	17.4498	17.3341	16.1003	16.1756	17.9889	17.8327	17.3288	17.3639	16.9975	16.9365	17.253	17.2698	15.6148	15.7145	17.2037	17.4016	16.0149	15.981	16.2119	16.1872	16.6802	16.4862	17.6279	17.3704	17.4436	17.2288	17.4233	17.8661	16.8383	16.7213	16.4304	16.8965	16.7426	17.0693	16.9564	17.2237	15.9515	15.497	16.5555	16.383	16.0456	16.7044	15.9873
PC(O-20:0/20:4)	Positive	0.818447	-0.0235661	0	19.6191	19.6426	20.0232	20.0471	18.9613	18.6606	20.1026	20.1866	19.5624	19.4562	19.9307	19.9404	19.364	19.3718	19.2161	19.2203	19.6343	19.8114	19.2825	19.1533	19.5603	19.6243	20.0624	20.2616	19.7366	19.6921	19.9002	19.9657	20.9474	21.124	19.6343	19.6383	19.9776	19.8612	18.7691	19.1629	19.3028	19.6341	19.4076	19.2107	19.3959	19.4817	19.3138	19.0135	18.8744
SM(d16:1/16:0)	Positive	0.818447	-0.0229833	0	21.4775	21.5005	21.9328	21.8333	21.0516	21.0044	21.2481	21.0379	21.6637	21.707	21.0717	21.1813	21.6548	21.6848	21.9769	21.8648	21.0278	21.1765	21.5888	21.3441	21.3049	21.1458	21.5705	21.7526	21.5172	21.5888	21.0345	21.0696	21.4117	21.7406	21.6931	21.6764	21.7599	21.694	21.4048	21.5357	21.5045	21.5923	21.8268	21.7403	21.422	21.3566	21.2208	21.6269	21.7318
SM(d18:1/20:0);SM(d16:1/22:0)	Positive	0.818447	-0.0338509	0	23.1063	23.1402	23.2403	23.1416	22.4404	22.4638	22.8477	22.8262	23.2735	23.2616	23.1496	23.1912	22.7687	22.5757	23.3935	23.1734	23.0044	23.0765	23.1342	22.996	23.0606	23.0018	23.3393	23.4986	23.2949	23.111	22.9409	22.8307	23.3906	23.4845	23.3253	23.2699	23.3145	23.2889	22.6166	22.7118	23.4883	23.5074	23.2534	23.3496	23.5487	23.6322	22.2275	23.2528	22.9791
SM(d19:1/24:0)	Positive	0.818447	-0.0338461	0	19.6379	19.6717	20.2199	20.3184	17.9094	17.8989	18.9993	18.7969	19.7517	19.6119	19.5224	19.6305	18.8731	18.9916	20.1562	19.9691	19.288	19.4191	20.3042	20.128	19.7744	19.8246	20.1724	20.2379	19.199	19.2528	19.0369	19.1067	20.0418	20.1665	20.2383	20.0655	19.9039	19.7631	19.1935	19.1925	20.2851	20.297	19.9455	19.8353	20.444	20.3992	19.1537	20.1516	20.0656
TG(40:0)	Positive	0.818447	0.182242	0	15.9901	15.8079	14.8173	14.3998	17.4714	17.0781	14.7938	14.9784	13.9454	13.8868	16.1791	14.3926	16.9807	16.3334	17.5037	19.6216	14.996	14.9874	17.9609	19.4807	16.2905	16.3969	15.3656	14.5489	14.9072	15.369	15.5341	15.5394	14.3068	13.8832	14.9835	14.8637	18.7187	19.0435	19.6842	19.1959	14.2643	13.3825	15.2378	14.2164	14.5306	14.277	18.5961	14.2565	13.7084
TG(52:2)	Positive	0.818447	0.0315666	0	24.7629	24.7313	24.9995	24.6785	24.3607	24.4355	25.2354	25.2391	24.8227	25.0895	24.3091	24.1218	24.7239	24.7051	24.9403	24.8003	24.3488	24.7316	24.8515	24.2464	25.1079	25.0013	24.8037	24.8955	24.9119	24.8558	24.9449	25.0705	24.8178	24.8868	24.8009	24.7759	24.6057	24.4435	24.6587	24.5013	25.0472	25.0823	24.35	24.5369	24.9366	24.9618	24.5456	24.5829	24.5711
PC(18:1_22:6)_B	Positive	0.829185	-0.0277966	0	18.7987	18.8265	19.7881	19.6939	18.2121	18.2435	18.8011	18.8081	18.2222	18.442	19.3874	19.3482	19.0654	19.1304	18.8288	18.6948	18.8434	19.0239	19.3749	18.997	18.0939	18.3305	19.4154	19.5944	19.151	19.162	19.9786	19.7408	18.6358	18.924	19.1467	19.0098	17.9856	18.0566	18.0039	18.0919	18.7751	19.0959	19.3963	19.3345	18.4564	18.6634	18.1836	18.624	18.6905
PC(O-16:0_18:1)	Positive	0.829524	-0.01318	0	20.9486	20.9618	21.3591	21.4896	19.8564	19.9553	21.1751	21.1141	21.3913	21.3723	21.0276	21.1804	20.7882	20.6965	20.7527	20.6036	21.4703	21.5283	20.759	20.6151	20.7856	20.8093	21.3991	21.4244	21.1325	21.0769	20.9717	20.9264	21.4632	21.5607	20.9299	20.786	21.6941	21.6574	20.6117	20.7841	21.0866	21.2423	20.7123	20.6687	20.5966	20.7029	20.9192	20.9927	20.3745
PC(14:0_20:5)	Positive	0.842246	0.0301213	0	15.5565	15.5264	15.6634	15.8224	15.9664	15.9111	14.5045	14.3844	15.8489	15.6032	15.757	15.4971	15.4428	15.6149	15.5324	15.6442	16.0776	16.5642	15.2871	15.0104	15.5628	15.4363	14.914	14.809	14.9503	15.2486	15.087	14.6032	14.0693	14.1902	15.6063	15.5709	17.1929	17.1191	15.6104	15.7283	14.0495	13.704	16.6839	16.5418	14.6889	14.5302	16.9385	17.1872	17.7404
TG(56:2)	Positive	0.842246	0.063304	0	18.1644	18.1011	16.6809	16.6445	20.1877	20.3566	18.7012	18.8407	18.2523	18.1593	18.0556	16.2109	17.758	17.7278	18.4677	18.607	20.3064	19.9868	18.6445	19.4346	19.5318	19.7063	16.5321	16.2306	17.4306	17.0593	17.9406	17.9296	19.8146	19.4801	17.585	17.7566	16.8068	16.7478	18.4298	18.4543	17.3379	17.8442	17.4998	17.3004	18.8319	18.8871	18.7133	18.0072	17.9266
Cer(d18:0/22:0)	Positive	0.857359	-0.0291401	0	16.3843	16.4134	16.1471	16.0692	16.6396	16.9107	15.1209	15.1193	16.109	16.2244	16.2712	16.1693	15.3006	15.2361	17.1979	17.0484	15.7193	15.7981	17.0991	16.9479	17.199	17.031	16.0211	16.1402	15.9969	16.3061	14.941	15.4761	16.4316	16.3919	16.3708	16.0157	17.5055	17.4307	15.878	16.0206	16.4296	16.151	16.0969	16.2841	17.2708	17.0826	16.6251	17.4343	15.4743
Cer(d18:1/24:1)	Positive	0.857359	-0.0216068	0	17.9115	17.9331	18.2985	18.336	17.1934	17.043	18.5371	18.525	18.4812	18.5273	17.4455	17.4715	18.1673	18.1286	18.1868	17.8771	17.1679	17.4185	17.9554	17.6761	17.7965	17.5093	18.4203	18.2235	18.4923	18.5166	17.2128	16.9795	17.5185	17.7013	18.4789	18.3434	17.9887	17.946	18.169	18.1587	18.6622	18.7967	17.9782	18.0163	17.4165	17.5766	17.3697	18.2361	17.608
DG(18:0_18:1_0:0)	Positive	0.857359	0.0483391	0	17.429	17.3807	16.6502	16.221	19.4955	19.437	17.7549	17.8518	16.621	16.9038	16.0563	15.4403	17.9	17.7107	18.4779	18.4626	16.2407	16.5304	17.8181	18.1814	17.8907	18.228	16.2384	16.3485	17.0458	17.2712	17.6479	17.9247	17.7996	17.798	16.735	16.966	16.8938	16.7488	17.9365	17.8673	16.9471	17.152	17.1089	16.6896	18.0548	18.0503	18.1823	16.698	17.6886
PC(15:0_18:2)	Positive	0.857359	0.0177513	0	20.5906	20.5728	20.7311	20.9202	20.3319	20.3137	20.5036	20.3712	20.4526	20.3661	20.4973	20.645	20.2625	20.3186	21.1446	21.1822	20.6903	20.6437	21.2521	21.0648	20.2284	20.3247	21.2306	21.2639	20.738	20.6532	19.7122	19.6405	20.7878	20.8789	20.4268	20.343	20.3894	20.196	20.2461	20.458	20.6714	20.6292	21.4881	21.327	20.5318	20.5569	20.45	19.9166	19.715
PC(16:0_18:1)	Positive	0.857359	0.0139322	0	25.9245	25.9106	26.0343	26.0327	25.789	25.8407	25.8581	26.0037	25.8563	25.9888	25.3762	25.4389	25.8558	25.824	26.0794	25.988	25.8956	25.9782	25.8226	25.4575	26.0472	26.0245	26.0759	26.1117	25.826	25.651	26.1035	26.0357	26.1501	26.0903	26.2272	26.1045	26.2686	26.1496	25.8432	25.7608	25.8508	25.8282	25.6126	25.6666	25.8921	25.8808	25.7981	26.0657	25.887
PC(16:0_18:2)_B	Positive	0.857359	0.0202575	0	22.2899	22.2697	22.063	22.0255	22.3854	22.2388	22.4883	22.6666	21.9053	21.8346	21.6715	21.8288	22.1684	22.243	22.4763	22.4674	22.0425	22.0276	22.4599	22.166	22.3172	22.2309	22.2482	22.0308	22.6663	22.3825	22.219	22.1823	22.2461	22.3178	22.4357	22.3337	22.5951	22.6754	22.4289	22.4676	23.0339	22.601	22.0737	22.0925	21.9655	22.0256	21.9216	22.2737	22.375
PC(16:0_20:3)_B	Positive	0.857359	0.0263546	0	20.5836	20.5573	20.6183	20.8273	20.5959	20.5786	20.4694	20.5023	20.2822	20.1987	20.0678	20.0479	21.3687	21.5112	20.4099	20.2222	20.625	20.7724	19.9501	19.8113	20.4718	20.4286	20.202	20.2895	19.368	19.3019	21.1239	21.1562	20.9491	21.1008	20.8241	20.8854	21.1465	21.0263	21.3095	21.5091	19.4739	19.5613	19.9333	20.0217	20.1904	20.2218	21.9363	20.7105	21.5254
PC(16:0_22:6);PC(18:2_20:4)	Positive	0.857359	-0.0243699	0	24.7396	24.764	25.1656	25.0501	24.3062	24.4355	24.4167	24.5211	24.8496	25.1192	24.6776	24.7147	24.6612	24.5462	24.9616	24.8003	24.5645	24.7251	24.7059	24.3364	24.2834	24.2184	25.2156	25.2943	25.5514	25.4163	25.0964	24.9951	24.4829	24.5006	24.7395	24.5329	24.9862	24.8963	23.8287	23.9012	25.1787	25.1101	24.9859	25.0208	24.7788	24.8121	24.3294	25.3955	25.1119
PC(16:0/O-16:0)	Positive	0.857359	0.0186286	0	20.1931	20.1744	20.5698	20.8006	19.4448	19.3613	20.4908	20.4978	20.4141	20.4914	20.5387	20.5391	19.8954	19.9307	20.1716	19.9438	20.1089	20.0778	20.3344	19.8402	20.3938	20.2808	20.6092	20.6845	20.5318	20.4685	20.191	19.9607	20.5318	20.6574	20.3051	20.0554	20.8764	20.6339	19.4466	19.6019	20.403	20.4635	19.6343	19.7146	19.7759	19.9454	19.8961	19.9682	19.5058
PC(17:0_0:0)_B	Positive	0.857359	-0.031078	0	18.192	18.223	18.5492	18.9023	17.9698	18.3201	19.2431	19.1923	18.3442	18.5989	18.3412	18.2999	18.4837	18.1134	18.0372	18.049	18.2763	18.562	17.8285	18.0473	17.7418	17.8536	18.3917	18.1035	18.5459	18.2663	18.5147	18.5789	19.2083	19.1943	18.3084	18.2712	17.2431	17.2934	18.2758	18.222	18.3768	18.2668	17.7944	17.6076	18.3486	18.2274	17.3771	18.0425	17.7286
PC(17:0_20:4)_A	Positive	0.857359	-0.0191997	0	20.2377	20.2569	20.5484	20.5623	19.5465	19.495	20.9245	21.0194	20.2037	20.1062	20.0139	20.0842	20.7529	20.8214	20.2188	20.1966	20.3783	20.5068	19.3367	18.885	20.0433	19.8887	20.6115	20.6898	19.5817	19.5016	19.9666	19.9492	20.7789	20.9425	20.8157	20.672	19.8447	19.8157	20.0789	20.3122	20.8004	20.767	20.5029	20.612	20.7192	20.8142	20.1521	20.5486	20.6455
PC(18:0_18:2)	Positive	0.857359	0.0157588	0	26.2199	26.2041	26.1846	26.0735	25.7213	25.8806	26.1753	26.3514	26.3849	26.4145	26.3799	26.2125	25.9638	25.9395	26.3294	26.251	26.2772	26.5087	26.532	26.1711	26.4058	26.1775	26.4331	26.4948	26.751	26.5664	26.1504	26.1001	26.5708	26.6156	26.3453	26.0524	26.4533	26.4099	26.0666	26.1632	26.4922	26.4188	25.8964	26.0303	25.9847	26.1407	25.875	26.014	25.4068
PC(18:0_20:2);PC(18:2_20:0)	Positive	0.857359	0.0144257	0	21.208	21.1936	20.9987	21.0002	20.8371	20.8306	20.9417	20.9772	21.2428	21.3611	21.0375	20.9824	21.8365	21.818	21.3722	21.1943	21.2529	21.4998	21.4794	21.1962	20.8971	20.8408	21.3326	21.4459	21.3128	21.3797	21.2489	21.1778	21.1525	21.3075	21.5597	21.3257	21.2678	21.1855	21.5718	21.7376	20.922	21.1058	21.1918	21.2447	20.8494	20.7883	21.089	20.762	20.7269
PC(18:0_20:3)_A	Positive	0.857359	0.0136076	0	24.4963	24.4827	24.3113	24.3089	24.1827	24.2408	24.2049	24.2635	24.7099	24.7538	24.4334	24.4861	24.5066	24.5213	24.7279	24.5529	24.5702	24.6985	24.6465	24.3501	24.323	24.2538	24.7908	24.8665	24.4651	24.336	25.0074	24.8897	24.6665	24.6498	24.6489	24.43	24.6378	24.4893	24.788	24.8881	24.2658	24.2665	24.4258	24.3973	24.422	24.5125	24.0038	24.1637	24.202
PC(18:0_22:6)_A	Positive	0.857359	-0.0245127	0	24.0269	24.0514	24.3969	24.4445	23.9325	23.9168	23.6013	23.587	24.3062	24.4692	23.966	23.8508	23.7966	23.8321	24.3162	24.1797	23.7062	23.6782	24.1905	24.0305	23.4752	23.247	24.4058	24.5932	24.7909	24.612	24.6829	24.6277	23.5467	23.7849	23.8827	23.8091	24.0207	24.0039	23.1651	23.313	24.3533	24.3435	24.2479	24.2096	24.1111	24.06	23.516	24.5829	24.3841
PC(18:1_20:5)_B	Positive	0.857359	-0.0193216	0	18.86	18.8794	19.6641	19.8133	18.5416	18.424	18.8725	18.8028	18.4556	18.4262	18.9509	19.1774	19.2323	19.2598	18.5207	18.4096	19.5547	19.656	18.7445	18.556	18.5611	18.5457	18.8774	18.9042	18.4934	18.5321	19.2059	19.0954	18.6041	18.6551	19.5107	19.2742	18.6771	18.6083	18.597	18.8509	18.5073	18.6176	19.5152	19.3782	18.4301	18.4383	19.0927	19.6918	19.7477
PC(18:2_0:0)_B	Positive	0.857359	-0.021914	0	23.2996	23.3215	23.3176	23.4588	22.8986	23.0061	24.1027	24.0558	23.6652	23.4348	23.9268	23.9074	22.7539	22.8002	22.8968	23.1605	23.8726	24.1	23.6018	23.5336	23.3689	23.3656	23.3375	23.0165	23.9617	23.7159	23.6042	23.4624	24.0751	24.397	23.442	23.4229	23.0646	23.121	23.3078	23.2323	23.1183	23.3775	22.2671	22.6324	23.1519	22.9768	23.3049	23.4268	22.138
PC(18:2_24:0)	Positive	0.857359	0.034976	0	16.1755	16.1406	16.3238	16.4827	15.4803	15.6807	15.6718	15.5985	16.7787	16.3277	16.0664	16.1461	14.6884	14.8284	15.6121	15.4814	17.8583	18.1803	16.754	16.7732	16.5802	16.9488	16.4928	16.0027	16.12	15.9272	16.6776	15.9244	17.601	17.5381	15.7174	15.4377	17.0864	16.4042	16.4809	16.711	15.9048	15.6706	15.7253	15.9436	15.7854	16.1986	15.6811	15.5746	14.8468
PC(19:0_0:0)	Positive	0.857359	-0.0294323	0	14.6327	14.6621	15.5812	15.6471	14.4847	14.757	15.7811	15.579	14.8176	14.9995	14.9462	15.0982	14.6555	14.6867	14.367	13.8694	15.3086	15.4718	14.2555	14.6293	14.1617	14.0087	15.1508	14.985	14.8945	14.9114	14.8711	14.9472	15.2739	15.6992	14.0338	14.5192	14.2144	14.2733	15.4356	15.2396	14.1331	14.6555	14.2089	13.4423	14.0765	13.9648	14.4178	14.4176	14.2494
PC(20:4_20:4)	Positive	0.857359	-0.0193697	0	18.7121	18.7315	18.3048	18.5209	18.4641	18.5236	19.1181	19.219	18.7789	18.773	18.6335	18.8226	18.4534	18.6384	18.3735	18.0631	18.3313	18.2317	17.9797	17.9547	18.5224	18.4143	18.7521	18.4691	18.6459	18.8243	18.5616	18.6728	19.3749	19.6013	18.9673	18.9966	19.324	19.1553	18.8582	18.9877	19.0445	19.1665	18.5479	18.4018	18.9924	19.0967	18.9154	19.0936	18.3979
PC(O-16:1/0:0)	Positive	0.857359	-0.0300483	0	17.6802	17.7102	17.8231	18.2859	17.4766	17.1342	18.7147	18.2424	18.3561	18.502	17.5034	17.8182	18.0802	18.2292	17.4287	17.1454	17.7546	17.4011	17.6189	17.4197	16.8354	17.0197	17.6674	17.7243	18.3162	18.6677	18.4036	17.7051	18.3203	18.4238	17.365	17.478	17.7819	17.7689	17.849	17.9764	17.4349	17.7772	17.227	17.3026	17.3108	17.1423	17.2905	18.123	16.7607
PC(O-18:1/0:0)_B	Positive	0.857359	-0.0396337	0	14.8961	14.9357	14.947	15.7473	14.3051	14.1576	15.4135	15.7555	15.3208	15.1723	15.1107	15.3276	15.3832	15.5469	14.4869	13.9112	15.0014	14.9967	14.9244	14.5442	14.4944	14.2493	14.3872	14.5846	15.3937	15.6315	15.8478	15.0389	15.8783	15.9794	15.1194	14.8635	14.6993	14.821	15.0116	15.4041	14.5405	14.7771	14.0935	14.0743	15.0108	14.9423	14.358	15.1964	14.1827
PC(O-18:1/18:2)	Positive	0.857359	0.01712	0	19.4589	19.4418	19.5344	19.6247	18.2023	18.2521	20.0564	20.36	19.7877	19.7556	19.9132	20.12	19.9431	19.964	18.6549	18.5152	19.9982	19.9956	19.5767	19.2932	19.1473	18.7762	19.5557	19.7166	21.266	21.122	19.6753	19.6778	20.1427	20.2331	19.8934	19.7891	20.0802	19.8451	19.2454	19.5223	19.6343	19.6343	18.8751	18.9298	18.8653	18.7844	18.7965	18.7821	17.8704
PC(P-16:0/16:0)	Positive	0.857359	0.0246781	0	20.1918	20.1671	20.4197	20.6247	19.6343	19.555	19.9193	19.8407	20.738	20.6986	20.1976	20.4003	19.8648	19.824	20.387	19.9122	19.8309	19.8782	20.5795	20.1929	20.1888	19.87	20.6819	20.8562	20.2327	20.3312	20.08	20.0827	20.3379	20.612	20.3085	20.1058	21.1334	20.9209	19.7281	19.6563	20.5699	20.5981	20.0292	19.7878	19.9277	19.8271	20.4294	20.5755	19.5605
PC(P-16:0/18:2)	Positive	0.857359	0.012619	0	21.8984	21.8858	22.0458	22.0722	21.0458	20.9586	21.9667	21.9881	22.2552	22.1898	21.9288	21.853	22.0188	21.9119	21.6192	21.512	21.7479	21.8539	22.0446	21.7726	22.2343	22.1849	22.0523	22.0374	22.722	22.5939	21.5596	21.5548	21.9609	22.0407	21.8969	21.8234	22.77	22.6004	21.768	21.7816	21.7457	21.7653	22.3491	22.2903	21.4242	21.4179	21.7941	22.241	21.2084
PC(P-16:0/22:6)	Positive	0.857359	-0.0374982	0	19.4884	19.5259	20.0932	20.3345	18.712	18.6973	18.9074	18.7737	20.0471	20.1057	19.6163	19.6343	19.7694	19.7362	19.44	19.2436	18.7594	18.7299	19.4057	19.0541	18.6482	18.5005	19.9882	20.0905	20.5378	20.4797	19.8618	19.721	18.6559	18.756	20.0303	19.8778	20.0408	19.832	18.3459	18.442	19.6997	19.8511	20.0412	20.1596	19.1333	19.215	19.1448	20.6949	19.9111
PC(P-18:0/20:4)	Positive	0.857359	-0.0230984	0	21.1562	21.1793	21.3129	21.4662	20.1213	19.9879	21.402	21.4031	21.4164	21.2875	21.3341	21.4596	21.5613	21.5122	20.9026	20.7043	20.6497	20.6591	20.7035	20.6324	20.8904	20.8933	21.2333	21.1728	21.424	21.3904	21.0797	20.8508	21.6342	21.6458	21.8684	21.7525	21.9893	21.8833	20.8083	21.0024	20.7664	20.9485	20.9999	20.8887	21.3512	21.2758	20.7118	21.5444	20.385
PC(P-18:0/22:6)_A	Positive	0.857359	-0.028585	0	19.6445	19.6731	20.3963	20.4896	18.5807	18.5652	19.6821	19.8088	20.2133	20.3326	19.7691	19.978	19.862	19.6954	19.3793	19.2695	19.5404	19.7054	19.5523	19.2384	18.6923	18.7813	20.1714	20.2294	21.0046	20.8138	20.2404	20.0983	19.4302	19.5268	20.2327	20.1434	19.9558	19.8853	18.3791	18.4932	19.9205	19.9851	19.9262	19.8011	19.0458	18.984	19.1269	20.1872	19.6143
SM(d17:1/24:1)	Positive	0.857359	-0.0326109	0	21.6303	21.6629	22.2553	22.2866	20.7953	20.7489	21.7251	21.6386	22.0277	22.038	21.4815	21.645	21.9087	21.8002	22.2005	21.8811	20.654	20.8463	21.6732	21.487	21.1505	21.0712	22.4723	22.5314	21.6797	21.5798	20.8674	20.936	21.3293	21.5175	22.0142	21.8657	22.0069	21.8773	21.3066	21.3778	22.3613	22.4186	22.1257	21.8966	21.3851	21.5752	21.0281	22.1172	21.6233
SM(d18:1/16:0)_B	Positive	0.857359	-0.018643	0	24.3632	24.3819	24.642	24.5728	23.5815	23.629	24.4167	24.587	24.5821	24.7911	24.3243	24.3768	24.2262	24.239	24.4728	24.2839	24.3287	24.4501	24.6846	24.3682	24.2734	24.1913	24.7646	24.9169	24.6151	24.4923	24.3303	24.2105	24.698	24.8311	24.6083	24.4157	24.7301	24.6303	24.1823	24.2882	24.6921	24.6313	24.0448	24.0547	24.1471	24.1519	23.7298	24.4268	23.9089
SM(d18:2/21:0)	Positive	0.857359	-0.0299375	0	18.6406	18.6705	19.1104	19.1529	17.9493	18.0179	19.0337	18.9063	18.6675	18.5434	18.538	18.6796	19.0315	18.9383	19.2994	19.1088	17.7729	17.8727	18.4583	18.2094	17.9057	18.1015	19.2597	19.2398	18.5222	18.4535	18.6922	18.4139	18.5404	18.7372	18.9595	18.845	18.6247	18.6509	18.3773	18.5026	19.2227	19.2358	19.3938	19.4258	18.5949	18.612	17.6227	18.8881	18.1779
SM(d18:2/25:0)	Positive	0.857359	-0.0264089	0	18.2083	18.2347	19.0785	19.1633	17.5559	17.5331	18.4634	18.5129	18.5234	18.4481	18.3171	18.3584	17.8959	17.6899	18.637	18.3656	17.3776	17.511	18.3535	18.2501	17.7553	17.6276	19.0671	19.0577	17.7895	17.822	17.9822	17.9023	18.1085	18.2771	18.2558	18.1894	18.5845	18.2757	18.4754	18.5386	18.4327	18.4166	18.7153	18.6603	17.9182	17.9925	17.7549	18.8798	18.1752
TG(50:5)	Positive	0.857359	0.0393847	0	19.6342	19.5948	18.9455	18.7264	20.3541	20.572	19.2213	19.0803	19.4805	19.5839	20.5514	20.0141	18.9427	18.9827	19.8579	19.9449	19.5833	19.54	20.7653	21.0561	19.9944	20.1572	18.889	18.4311	20.7594	20.8348	19.0288	19.5901	19.4662	19.5397	18.4299	18.6607	19.2161	18.8408	20.2977	20.4114	20.0092	20.2635	20.433	20.3839	19.5969	19.5045	19.6343	18.0139	18.6707
TG(51:2)	Positive	0.857359	0.0280507	0	21.4785	21.4504	21.5792	21.4582	22.0049	22.1602	21.7473	21.8787	21.0331	21.3847	20.5727	20.1825	21.8389	21.809	22.0686	22.1996	20.7641	20.9694	21.6336	21.6239	21.808	21.5927	21.4081	21.1387	21.0398	21.0495	21.3229	21.4923	21.2069	21.2516	21.1084	21.0973	21.0112	20.7008	21.6528	21.8317	21.2731	21.4632	21.5341	21.493	21.9368	21.992	21.9548	20.77	21.513
TG(53:4)	Positive	0.857359	-0.0144346	0	20.3845	20.3989	20.0589	19.9948	20.0308	20.1131	20.9199	21.0389	20.4071	20.5915	20.1248	20.2315	20.1452	20.23	20.5219	20.4623	20.4692	20.7581	21.0511	20.9687	20.1806	20.3083	20.2974	20.1437	21.2475	21.1004	20.0109	19.8125	21.0709	21.0453	19.7728	19.8037	19.3035	19.152	20.6033	20.486	21.3195	21.3509	20.7546	20.7627	20.9003	21.0229	19.6495	19.628	19.8357
TG(54:2)	Positive	0.857359	0.0323914	0	22.7605	22.7281	22.1914	22.0919	22.9083	22.9168	23.4638	23.5741	22.7985	22.906	22.1983	21.3039	22.7311	22.6994	23.1079	23.1861	22.9521	22.9818	23.1588	23.3272	23.3902	23.588	22.0862	21.9704	22.734	22.6227	22.7758	22.7901	23.6536	23.6626	22.5426	22.6239	22.1614	21.9455	22.8717	22.8548	22.7647	23.0175	22.3237	22.2225	23.285	23.181	22.948	22.257	22.5739
TG(54:7)_A	Positive	0.857359	-0.0222416	0	21.1096	21.1318	19.7805	19.7019	21.7653	21.9241	20.5758	20.5732	21.256	21.2106	22.3148	21.971	19.8517	19.8542	20.3819	20.3319	21.7642	21.8486	21.9152	21.9889	21.6158	22.4252	20.5003	20.2465	23.2389	23.1786	20.6862	20.6354	21.5888	21.4864	20.1022	20.1087	20.3144	20.1333	20.9246	21.0498	23.6282	24.1852	21.677	21.628	20.9764	20.9197	20.0627	20.3619	20.8084
TG(55:3)	Positive	0.857359	0.0358557	0	17.2039	17.1681	16.5915	16.2747	17.4757	17.2144	18.1801	18.2467	17.053	17.2997	16.5224	15.8589	17.3419	17.4791	17.6417	17.7475	17.6661	18.0266	17.6148	17.9904	17.3136	17.1874	16.8775	16.5424	16.8236	17.0948	16.4634	16.7202	17.9964	17.8485	17.0252	17.244	15.6679	15.8587	17.9075	17.9521	17.6956	17.6929	17.2521	16.9864	17.5955	17.6316	17.5002	16.1554	17.3538
TG(56:3)	Positive	0.857359	0.024306	0	19.2963	19.272	18.4936	18.2596	20.4331	20.6541	20.0514	20.1631	19.6558	19.6972	18.9933	18.1672	18.9465	19.0153	19.1335	19.2808	21.1061	21.1814	19.2786	19.6473	19.9415	20.1443	18.7028	18.7178	19.1569	19.0034	18.7743	18.72	20.1098	19.987	19.0592	19.2101	17.959	17.9448	19.4474	19.5233	19.7605	19.8013	18.9784	18.8399	19.9021	19.8858	19.2855	18.6342	19.0382
TG(60:3)	Positive	0.857359	0.0447036	0	15.1687	15.124	13.276	13.4317	19.1084	19.3574	15.1637	15.2465	15.3961	15.2385	15.415	14.2574	13.746	13.5726	14.3279	14.5099	18.9868	18.6445	15.3674	15.8392	17.532	17.2011	12.871	12.724	14.7619	14.1543	14.9659	14.8913	17.6853	17.0838	13.5799	13.9162	13.4918	13.6399	14.8221	14.7362	14.3776	15.2039	14.9845	14.7513	16.5547	16.3842	16.7651	16.1532	14.0896
PC(14:0_20:4)	Positive	0.858198	0.0139439	0	19.4913	19.4773	18.7216	18.8422	19.5363	19.5343	19.1521	19.1493	19.346	19.323	19.56	19.6684	19.3802	19.475	19.5676	19.4586	19.3931	19.5126	18.7904	18.6643	19.5741	19.5323	19.2861	19.1846	18.4595	18.5011	19.1165	19.1682	19.345	19.6343	19.7927	19.6617	20.8225	20.7272	19.6258	19.7963	18.3797	18.4463	20.4316	20.3062	19.5034	19.46	19.989	19.4149	19.8357
PC(17:0_18:1)_B	Positive	0.858198	0.0124249	0	20.8297	20.8173	21.2312	21.3065	20.583	20.6207	21.3956	21.4285	20.6623	20.5951	20.1901	20.3786	21.2811	21.2194	20.8796	20.7097	21.0394	21.0373	20.5506	20.2459	20.6544	20.6124	21.2078	21.2102	20.1983	20.0979	20.9563	20.7988	21.3728	21.6419	21.316	21.1503	20.5632	20.4431	20.5599	20.3906	20.5716	20.6442	20.8431	20.7813	20.7969	20.8582	20.7071	21.0314	20.8313
PC(O-20:1/20:4)	Positive	0.858198	-0.00963847	0	19.752	19.7617	20.1887	20.3196	18.9254	18.9894	20.3086	20.2769	19.8714	19.8125	19.9627	20.0761	19.4352	19.5085	19.3826	19.2746	19.9726	20.1544	19.3631	19.3089	19.6469	19.4439	20.4801	20.4756	19.6343	19.6297	19.9584	19.8433	21.0042	21.1268	19.8963	19.7869	20.3224	20.1955	19.1619	19.3291	19.9005	20.1019	19.2785	19.2066	19.232	19.2749	19.7111	19.6408	19.1034
CE(18:1)	Positive	0.858829	0.0241087	0	20.2547	20.2306	20.8331	20.7557	20.105	20.1483	20.6116	20.8091	20.5533	20.8309	20.3568	20.2931	20.3191	20.2111	20.1913	19.8655	20.335	20.5931	20.0391	19.2165	20.4595	20.3436	20.5495	20.8587	20.4532	20.2557	20.5222	20.4918	20.3009	20.1907	20.3891	20.2725	19.9699	20.1591	19.2926	19.1569	20.8572	20.3437	19.591	19.7938	20.3003	20.3305	19.755	20.2563	20.0982
Cer(d18:0/24:0)	Positive	0.858829	-0.0253867	0	16.9693	16.9947	16.8236	16.7948	17.2948	17.4302	15.4688	15.6198	16.9307	16.9931	16.709	16.7001	15.4117	15.401	17.5474	17.5926	16.5028	16.4194	17.6763	17.6138	17.8795	17.6477	16.9837	16.7899	16.3925	16.504	15.6121	15.4396	16.9289	17.1532	16.5741	16.2137	17.9765	18.3605	16.3993	16.8332	17.2217	16.6944	16.6413	16.5342	18.0001	17.8654	17.1501	18.1855	16.6257
PC(18:1_20:4)_A;PC(16:0_22:5)	Positive	0.858829	-0.015462	0	23.7158	23.7312	23.8899	23.8691	23.3993	23.4355	24.0894	24.1016	23.7721	23.937	23.6048	23.5527	23.5617	23.4959	23.6669	23.3976	23.6096	23.8691	23.341	23.0862	23.7859	23.6949	24.0732	24.2218	24.0954	23.8436	23.918	23.8093	23.8797	23.982	23.8598	23.7534	23.742	23.6362	23.5916	23.6052	24.0472	24.0192	23.4405	23.5633	23.7731	23.8564	23.3819	23.9699	23.6106
PC(20:4/P-18:1)	Positive	0.858829	-0.0156633	0	20.7295	20.7451	20.7252	20.9498	19.7985	19.7763	20.8236	20.6282	21.2962	21.1535	20.6631	20.7639	21.2671	21.2353	20.394	20.1943	20.5345	20.5884	20.3077	20.1652	20.1346	20.1377	20.9433	21.0337	21.1279	21.0241	20.5094	20.389	20.7678	20.9439	21.6064	21.5434	21.5251	21.36	20.579	20.737	20.7848	20.9377	21.0535	20.8879	20.4283	20.4849	20.6797	21.3739	20.2413
PC(P-16:0/20:5)	Positive	0.858829	-0.0304897	0	18.342	18.3725	19.6337	19.5782	17.7497	17.5634	17.5763	17.8123	19.148	19.1858	18.1671	18.4185	18.8822	18.8361	17.74	17.6166	18.6912	18.7001	18.4446	18.0865	18.1659	17.979	18.2413	18.3419	19.3144	19.1009	18.0488	17.7795	17.1373	17.1248	19.3322	19.2204	18.7927	18.6815	17.4562	17.5387	18.4572	18.4992	18.2908	18.2752	17.3663	17.481	18.9861	20.561	19.296
PC(P-18:0/22:6)_B	Positive	0.862196	-0.0276031	0	18.5853	18.6129	19.4362	19.6038	17.5566	17.6089	18.5263	18.449	18.7458	18.7829	19.0771	19.2201	18.8618	18.8228	18.5123	18.1664	18.0857	18.0254	18.628	18.1411	17.4343	17.4985	18.9911	19.0271	19.4976	19.4877	19.0371	18.9695	18.401	18.453	18.9034	18.6424	18.9868	18.8343	17.4665	17.7092	17.7694	18.1325	19.3812	19.2468	18.4931	18.4289	18.1317	19.5342	18.6001
PC(16:1_20:4)	Positive	0.873616	0.012971	0	19.7632	19.7503	19.2273	19.3136	19.2831	19.2073	19.7778	19.5586	20.0714	19.8372	19.2565	19.3436	19.8576	19.8634	19.7681	19.676	19.0043	19.0964	18.5795	18.55	19.1939	19.2484	19.4233	19.1682	18.8631	19.0522	19.1093	19.0383	19.7138	19.9701	20.2403	20.0819	20.8533	20.6631	20.3584	20.3971	20.1393	20.114	20.7934	20.6735	19.9689	20.3483	20.1682	19.8677	20.1839
CE(20:3)	Positive	0.874158	0.0161566	0	19.3043	19.2882	19.489	19.417	18.7757	18.695	19.1405	19.2991	19.6343	20.0525	19.3367	19.3147	19.4219	19.3992	19.5042	19.3231	19.3439	19.4533	19.1544	18.6089	19.3663	18.9979	20.002	20.0511	19.1716	19.2546	19.6203	19.5952	19.4348	19.5093	19.5458	19.3725	19.2878	19.2115	19.2051	19.0539	19.4796	19.2274	19.0339	19.1257	19.3437	19.4042	18.7853	18.997	19.2309
PC(16:0_18:3)_B	Positive	0.874158	0.0141462	0	20.9638	20.9497	20.2721	20.4988	21.7671	21.6129	20.6954	20.4663	20.6218	20.5036	20.9373	21.2385	21.3607	21.4971	20.6797	20.7385	20.5969	20.5726	20.9955	20.7345	21.3116	21.3625	20.3043	20.3244	19.8817	19.8885	21.7251	21.6209	20.865	20.963	21.1193	21.1008	22.0516	21.7858	21.242	21.4646	19.988	20.0314	20.5867	20.4939	20.8197	20.8637	21.5571	21.0179	20.7074
DG(18:1_0:0_18:1);DG(18:0_18:2_0:0)	Positive	0.875016	-0.0154333	0	20.4949	20.5103	20.4483	20.4185	21.3622	21.326	21.1844	21.3013	20.6895	20.767	19.2326	19.1904	20.73	20.6845	20.7807	20.7915	20.5479	20.7218	20.1554	20.0327	20.3308	20.5134	20.167	20.1015	20.1815	20.3108	20.5916	20.6534	20.7065	20.8113	20.0682	20.1992	19.4485	19.5671	21.0204	20.8401	21.0342	21.2431	20.2256	20.1504	21.2277	21.2281	20.7635	19.948	20.7129
PC(18:0_18:1)	Positive	0.875016	-0.00712819	0	24.3883	24.3954	24.5806	24.5418	24.4166	24.3622	24.4944	24.587	24.4062	24.5367	24.1132	24.1688	24.362	24.4491	24.4306	24.1924	24.4821	24.6576	24.4958	24.3226	24.5058	24.5386	24.3714	24.3634	23.9895	23.9833	24.6375	24.6277	24.6792	24.7493	24.6355	24.5656	24.6186	24.5461	24.4472	24.5728	24.1362	24.1641	23.8749	23.8385	24.1292	24.255	24.4988	24.507	24.326
PC(O-18:0/22:6)	Positive	0.875016	-0.0243815	0	19.1304	19.1548	19.8757	20.022	18.2284	18.2723	19.4569	19.3932	19.4138	19.335	19.8238	19.8671	19.1976	19.1489	19.358	19.0989	18.7404	18.5726	19.0643	18.7569	18.2628	18.3809	19.6682	19.7576	19.9526	19.8168	19.5248	19.5127	19.3505	19.3468	19.1946	19.217	19.4624	19.2926	17.6622	17.6797	19.0392	18.9156	19.2949	19.2418	18.6117	18.6044	18.389	19.8425	19.133
TG(50:2)	Positive	0.875016	0.0197239	0	23.688	23.6682	23.8296	23.5507	23.9563	23.8326	23.5342	23.8565	23.5166	23.8454	22.8964	22.6749	23.7798	23.8482	24.2691	24.1987	23.0586	23.2025	23.7216	23.5416	24.1022	23.9961	23.3281	23.0445	23.2701	23.4342	23.992	24.0047	23.3059	23.3552	23.3978	23.5849	23.8665	23.7043	24.0448	23.7998	23.3436	23.3704	23.6234	23.7946	24.0552	24.4194	24.028	23.1116	23.6773
PC(19:0_20:4)	Positive	0.878153	0.0086718	0	18.3436	18.3349	18.4565	18.5034	17.5912	17.4853	18.6391	18.6005	18.7399	18.7347	18.4391	18.6003	18.0826	17.9906	17.8575	17.6641	18.8012	18.8699	17.5593	17.5848	17.6323	17.8156	19.178	19.0348	18.0129	17.8973	18.5092	18.3356	18.709	18.8786	18.7437	18.4635	18.2968	18.2224	18.0042	18.0277	18.4719	18.5554	18.5539	18.4944	18.5475	18.6447	18.1557	18.2565	18.3663
PC(O-18:0/0:0)	Positive	0.878153	0.0171432	0	15.5317	15.5146	16.1191	15.8477	15.023	15.2742	16.6203	16.477	15.3261	15.5706	16.2295	16.3121	16.0214	15.8296	15.1763	14.5987	15.5013	15.6838	15.2558	15.0043	15.393	15.367	15.3141	14.9799	16.3948	16.1397	16.1748	15.9166	16.8733	16.8656	15.4121	15.4759	15.0703	15.299	15.6407	15.8369	15.4122	15.3605	14.2481	14.0683	15.528	15.409	14.8663	15.2792	14.3359
TG(56:4)_A	Positive	0.878153	-0.0103714	0	19.5873	19.5977	18.7242	18.6968	19.8262	19.9633	19.8019	19.9095	19.9218	20.0137	19.5643	19.2376	19.712	19.8273	19.4997	19.5253	20.4956	20.7249	19.6723	19.9066	19.9174	20.038	19.0885	19.1612	19.5989	19.5223	19.6298	19.5693	19.9296	19.8649	19.4596	19.6343	18.5976	18.5094	19.8715	19.9218	20.2331	20.242	19.623	19.4309	19.8901	19.8803	19.2316	18.8603	19.4428
PC(0:0_14:0)	Positive	0.885135	0.0252885	0	17.7962	17.7709	17.1955	17.6483	18.3432	18.2195	18.0413	17.2091	17.5562	17.8462	18.0648	17.914	18.1133	18.0155	18.2252	18.0618	18.0003	18.3289	17.7451	17.6299	18.1592	18.1573	17.0172	17.4931	16.8811	17.0406	18.2515	18.1685	17.6121	17.1815	17.7684	17.4769	18.024	18.1196	17.3667	17.9326	16.8757	16.9057	17.6659	17.6562	17.4339	17.503	18.0422	17.4815	18.173
SM(d18:2/23:0)	Positive	0.885135	-0.0164941	0	22.3392	22.3557	22.911	22.9113	21.8529	21.847	22.8084	22.7927	22.4904	22.485	22.3279	22.4413	22.22	22.1146	22.8165	22.5138	21.656	21.7224	22.3793	22.1616	21.5667	21.5919	22.7432	22.862	22.2524	22.1585	22.3635	22.1847	22.45	22.4756	22.5695	22.2783	22.6122	22.5234	22.5407	22.474	22.2763	22.463	22.7296	22.7765	22.12	22.1954	21.6144	22.6771	22.1265
TG(54:5)_A	Positive	0.885135	0.0177589	0	23.3823	23.3645	22.8427	22.8974	23.3854	23.666	23.794	24.0465	23.6952	23.8335	23.8554	23.5168	22.5441	22.566	22.9545	22.9756	24.2667	24.4581	23.5904	23.4847	23.8817	24.2095	23.4449	23.4008	24.241	24.1508	23.1068	22.9589	24.2809	24.2	22.8049	23.1059	22.3922	22.5455	23.2654	23.0906	24.7005	24.6158	23.2083	23.2096	23.6402	23.6449	23.715	22.6735	22.1275
PC(17:0_0:0)_A	Positive	0.909147	-0.0116538	0	17.3245	17.3361	18.2205	18.2794	17.1704	17.156	18.506	18.2964	17.0305	17.1566	17.4356	17.4169	18.2601	18.0124	17.5373	17.1205	17.759	17.7332	17.2114	17.1463	17.0248	17.1172	17.5233	17.315	17.0399	17.2495	17.6175	17.3923	17.8277	18.1727	17.4591	17.4757	15.8408	16.1968	17.7581	18.0703	17.3949	17.3122	16.998	16.9598	17.1436	17.1927	17.2888	17.1813	17.494
PC(17:0_20:3)_B	Positive	0.911636	-0.0136201	0	18.8451	18.8587	18.9286	18.8528	18.2617	18.075	19.0879	19.2723	18.854	19.0592	19.2674	19.2414	19.405	19.2139	19.0722	18.7676	19.3087	19.343	18.7668	18.4849	18.577	18.1254	19.5296	19.6343	19.0703	18.7096	19.114	19.278	19.3184	19.4937	18.7457	18.8036	18.0967	17.9702	18.8077	18.9456	18.9528	19.087	19.3819	19.281	18.96	18.9762	17.7228	18.3672	18.2412
PC(20:0_20:4)_B	Positive	0.911636	-0.00689425	0	18.74	18.7469	18.5843	18.4675	17.9623	17.8988	18.7578	18.5949	19.277	19.2819	18.9302	19.0078	17.9344	18.0046	17.8614	17.827	19.8449	19.9348	17.9956	18.0531	18.8482	18.7579	19.1723	19.1657	18.4162	18.296	19.2093	19.0627	19.7034	19.654	18.9607	18.8636	19.0933	18.9446	18.4465	18.7199	18.9176	18.896	18.5065	18.4946	18.9649	18.9921	18.3112	18.627	17.9233
SM(d16:1_24:1);SM(d18:2_22:0)_A	Positive	0.911636	-0.0128801	0	22.0608	22.0736	22.5029	22.4829	20.8082	20.9021	21.8272	21.7827	22.6828	22.6402	21.8302	21.813	22.351	22.1771	22.6091	22.3536	21.2919	21.4207	21.8373	21.6253	21.7511	21.5583	22.6248	22.6463	22.5411	22.3865	21.4166	21.2416	21.5717	21.7097	22.6036	22.4605	22.4841	22.4273	21.6514	21.794	22.709	22.7321	22.4152	22.5175	22.0268	22.0906	21.5761	22.5075	22.3423
Cer(d16:1/22:0)	Negative	0.91603	0.0296772	0	16.9386	16.9089	16.9019	17.0621	16.4665	16.375	17.2734	17.1379	16.7834	16.6287	16.4831	16.5685	16.7293	16.7244	16.7137	16.6752	16.6081	16.6871	16.8638	16.5529	17.4435	17.4249	17.1274	17.1963	17.2015	17.0157	16.6094	16.5739	16.9384	16.7669	17.4073	17.3538	16.3397	16.3237	16.8554	16.8172	17.3744	17.3733	17.7008	17.6158	17.4592	17.5205	16.2983	17.203	17.2823
Cer(d16:1/23:0)	Negative	0.91603	-0.0801767	0	16.2532	16.3334	16.7862	16.7467	15.6943	15.6443	16.7079	16.6617	15.8303	16.0603	15.9716	16.4271	16.2626	16.4794	16.0963	16.1473	16.1139	15.9271	15.9143	15.9793	16.5656	16.8044	16.0972	16.3511	16.3197	16.0184	15.8195	15.6419	16.2874	16.3285	17.0311	17.0776	15.3345	15.1318	16.4016	16.4936	16.5028	16.7686	17.106	17.1983	17.0432	16.7239	15.235	16.4016	16.7741
Cer(d18:1/16:0)	Negative	0.91603	-0.0350053	0	17.7782	17.8132	17.8901	17.9418	17.1891	17.2306	17.7893	17.8555	17.8947	17.7317	17.1751	17.5872	17.7063	17.6461	17.467	17.3619	17.329	17.4576	18.0244	17.9581	18.1053	17.933	18.5556	18.4357	17.868	17.9925	17.6546	17.6197	17.8817	17.957	18.1279	18.2395	17.7219	17.7637	17.8787	18.055	18.4045	18.5986	18.0394	17.9731	17.4342	17.1191	17.278	17.81	17.8382
Cer(d18:1/22:0);Cer(d16:1/24:0)	Negative	0.91603	-0.0360884	0	19.1997	19.2358	19.434	19.3342	18.787	18.704	19.1232	19.3231	18.8036	18.9174	18.7933	18.9623	19.0189	18.9763	19.0312	18.8935	19.4116	19.6589	19.5513	19.1827	19.9013	19.6571	19.4696	19.4709	19.0908	19.3054	19.0608	18.7974	19.5269	19.5545	19.6553	19.5075	18.8171	18.9993	19.0975	19.3045	19.3595	19.5576	19.5463	19.3648	19.5334	19.3247	18.4258	19.3249	19.205
Cer(d18:1/23:0)	Negative	0.91603	-0.041798	0	19.2102	19.252	19.8193	19.7688	19.0464	18.8493	19.5651	19.7327	18.7983	19.0688	19.0953	19.2739	19.2344	19.3007	19.2543	19.1408	18.8645	18.9634	19.4035	19.0413	19.5125	19.2231	19.4576	19.437	19.2576	19.2204	19.0053	18.6959	18.9719	19.1672	19.3718	19.5954	18.6919	18.7449	19.2692	19.3652	19.3391	19.3173	19.6326	19.7593	19.2466	19.1147	18.493	19.1502	19.5745
Cer(d18:1/24:0)	Negative	0.91603	-0.0638143	0	20.6663	20.7301	21.0611	21.0368	20.3068	20.2865	20.7441	20.6605	20.2055	20.5387	20.3043	20.6389	20.2213	20.1666	20.4759	20.411	21.1882	21.181	20.8995	20.7021	21.1373	21.0189	20.8149	21.1752	20.6335	20.6047	20.5566	20.4941	20.9361	21.3392	20.6029	20.7562	20.5322	20.607	20.9399	21.0315	20.8156	21.0826	20.9334	20.9032	20.8098	20.6219	19.8286	20.5796	20.9498
Cer(d18:1/24:1)	Negative	0.91603	-0.0543549	0	19.4246	19.479	19.8327	19.9364	18.6402	18.5066	19.6575	19.8894	19.7049	19.8698	18.7934	19.1424	19.5421	19.6755	19.3158	19.0381	19.2389	19.3624	19.2286	19.1514	19.4605	19.4276	20.1057	20.2939	19.9687	19.8766	18.916	18.8833	18.9723	18.926	19.917	19.8754	19.3327	19.2715	19.6026	19.5338	20.3316	20.3719	19.8454	19.9078	18.8419	18.9391	19.0736	19.5768	19.8416
Cer(d18:1/25:0)	Negative	0.91603	-0.160081	0	17.0137	17.1738	18.1674	18.0424	16.69	16.1106	16.9221	17.6896	16.8742	17.0212	16.9409	17.5199	16.9639	16.9276	17.2268	17.3073	16.2232	16.6567	17.459	17.1593	17.4722	17.1417	17.2981	18.2341	16.2752	16.3305	16.5249	16.2623	16.8612	16.9526	16.9731	17.6536	16.8173	16.9832	17.1104	17.1391	18.0121	17.7445	17.4858	17.5276	17.2862	17.1421	16.0143	17.1416	17.7464
Cer(d18:2/22:0)	Negative	0.91603	-0.0484106	0	16.9423	16.9907	17.3429	17.3099	16.486	16.4121	17.6077	17.4825	16.5214	16.7125	16.1908	16.2261	16.9243	17.1847	16.8806	16.5724	16.8847	17.1335	16.9435	16.6357	17.3343	17.1813	17.0415	17.2331	17.4142	17.4379	16.9951	16.9003	17.4958	17.575	17.3646	17.173	16.1225	16.3806	17.447	17.6085	17.2234	17.2439	17.5629	17.5394	16.9781	16.9267	15.9219	16.9664	16.9006
Cer(d18:2/23:0)	Negative	0.91603	-0.0888305	0	17.0541	17.1429	18.0693	17.9998	16.7457	16.5913	18.0291	18.0934	17.0333	17.0465	16.5654	16.9743	17.3362	17.2112	17.0301	17.088	16.5096	16.6371	17.1663	17.0295	16.5714	16.6498	17.2219	17.1757	16.8292	17.4111	17.1296	16.9813	17.1011	17.3298	17.174	17.3726	16.4803	16.4773	17.7267	18.013	16.7432	17.1308	18.1861	17.9141	16.6994	16.9707	16.0388	17.1902	17.3074
HexCer(d18:1/22:0)	Negative	0.91603	-0.0464962	0	19.118	19.1645	20.0196	20.0999	18.7187	18.4193	18.8214	18.8442	18.602	18.7518	19.3486	19.4635	18.9146	18.9661	18.6659	18.5623	19.5821	19.8731	19.382	18.9815	19.0465	18.96	20.0611	20.24	18.5165	18.6915	19.7529	19.8479	19.3969	19.504	19.076	19.0338	19.7297	19.7842	19.1876	19.2687	19.9835	19.8777	18.7519	18.9662	18.6465	18.6985	18.8316	18.6576	18.2276
HexCer(d18:1/23:0)	Negative	0.91603	0.0250973	0	17.9832	17.9581	19.2242	18.9112	17.9181	17.7214	18.0549	18.0891	17.3821	17.6789	18.1987	18.4849	18.206	17.962	17.5987	17.6828	17.9809	17.733	18.1364	17.9046	17.7869	17.4554	19.0647	19.0916	17.4676	17.0648	18.5687	18.5381	17.6786	17.3308	17.8156	17.9248	18.5382	18.6002	18.2582	18.2543	18.6845	18.7686	17.9442	17.8908	17.6566	17.049	17.3264	17.6329	16.8017
HexCer(d18:1/24:1)	Negative	0.91603	0.0861107	0	18.4544	18.3682	19.663	19.4825	17.6132	17.5342	18.8224	18.8891	18.5066	18.4068	18.7104	18.8383	18.9264	18.722	18.1931	17.9748	18.3221	18.1948	18.1422	17.9503	18.0534	17.6839	19.9547	20.1194	18.2212	18.1071	18.8285	18.8395	18.1874	18.0261	18.3242	18.2021	19.1966	19.2321	18.2111	18.0385	19.4651	19.3137	18.2917	17.96	17.4525	17.5632	18.2554	18.303	17.8138
PE(16:0_0:0)	Negative	0.91603	-0.0716736	0	17.6115	17.6832	17.7273	17.8424	17.6301	17.6645	17.9383	18.1641	17.2992	17.1256	17.7	17.5785	17.5082	17.8055	17.6147	17.6947	18.2683	18.2437	17.5512	17.4347	17.7164	17.9141	17.3247	16.7757	17.8298	17.6778	18.3949	18.3424	17.9785	17.8051	17.5496	17.9296	16.5949	17.0554	17.8762	17.7175	16.96	17.5747	17.1629	17.5027	17.6634	17.5378	17.7766	17.7352	18.0459
PE(16:0_18:1)	Negative	0.91603	0.0580197	0	19.1906	19.1326	18.4892	18.4202	19.8782	19.9572	19.4974	19.6774	18.3585	18.2781	18.4466	18.1724	19.091	18.9628	19.9511	19.9412	18.8927	18.9896	19.094	19.2846	19.9408	20.283	18.6284	18.5849	18.862	18.7903	19.3191	19.3978	19.206	19.0343	18.2919	18.6379	18.6615	18.4849	19.3238	19.2489	19.2584	19.2857	18.8314	18.7868	20.1729	20.1727	20.2809	18.5317	19.3537
PE(16:0_18:2)	Negative	0.91603	0.0603236	0	19.9747	19.9144	19.3252	19.2457	20.4135	20.3172	19.9652	19.9731	19.0392	18.9014	19.7505	19.3611	19.2994	19.4078	20.878	21.0002	19.6913	19.6923	20.6743	20.6129	20.4417	20.776	19.4789	19.4826	20.613	20.538	19.6252	19.5971	20.1087	19.9028	18.4869	18.902	19.8688	19.7673	20.2632	20.1961	20.2361	20.2614	20.3032	20.1781	20.719	20.4145	20.4485	19.5903	19.4176
PE(16:0_20:4)	Negative	0.91603	-0.0255093	0	20.6819	20.7075	20.402	20.4547	20.9034	20.7895	21.0906	21.0157	19.9167	19.9933	19.9296	20.0248	20.4866	20.4752	21.3467	21.4058	20.1196	20.3349	20.3927	20.2608	20.7188	20.9586	20.3638	20.3738	20.9103	21.0648	20.6654	20.8315	20.7902	20.8083	19.6754	19.9172	20.6411	20.6412	20.7549	20.9265	20.8025	20.9138	21.1193	21.034	21.4905	21.3842	21.0441	20.6322	20.9072
PE(16:0_20:5)	Negative	0.91603	0.0328597	0	15.8188	15.7859	16.2377	16.423	16.4509	16.309	15.3858	15.299	15.2563	15.1696	14.7827	15.0301	15.9841	15.7821	16.4379	16.4171	15.9627	16.1652	15.1967	15.4923	15.9736	16.0502	15.124	14.476	16.5574	16.5213	15.7146	15.7022	14.0362	14.3855	14.5843	14.3616	16.2084	15.5714	15.4457	15.3493	15.504	15.5967	16.4521	16.4045	16.2029	16.2377	17.1693	17.6828	18.1085
PE(16:0_22:4)	Negative	0.91603	0.066654	0	16.2748	16.2081	14.4644	14.8723	17.2146	16.7353	17.1781	17.0658	14.8218	15.0996	15.4101	15.4772	16.4571	15.9465	16.5405	16.5696	15.4248	15.7272	15.4443	15.2602	17.1588	17.4374	16.0502	15.689	15.2807	15.4198	16.8466	17.041	16.7288	16.969	15.8265	15.9407	15.8583	15.5426	16.9441	17.2756	16.0889	15.946	15.5524	15.4573	17.7635	17.6762	16.8684	15.3212	15.8517
PE(16:0_22:6)	Negative	0.91603	-0.0269288	0	21.1284	21.1553	21.1125	21.1981	20.958	20.7157	20.9205	20.9407	20.5982	20.5641	20.2099	20.523	20.9383	20.9327	21.9654	21.7608	20.6655	20.6812	20.8176	20.4849	20.371	20.6937	21.0272	21.0654	21.8453	21.7754	21.5064	21.5436	20.6982	20.6505	19.9431	20.0559	21.0166	21.0052	20.2377	20.5914	21.5945	21.3457	22.0805	22.0699	22.1399	22.1016	21.3786	21.8068	22.5337
PE(18:0_18:1)	Negative	0.91603	0.0644451	0	20.1031	20.0387	19.0754	19.0528	20.755	20.6786	20.1377	20.28	19.7422	19.804	19.7258	19.2134	20.0592	19.7987	20.2404	20.5847	20.3621	20.3341	20.5605	20.7564	21.2818	21.4652	19.5073	19.3921	20.0475	19.8577	19.8269	19.8058	20.8964	20.7213	19.3931	19.7618	19.087	19.1674	20.0403	19.9413	20.585	20.7183	19.9152	19.4113	20.6845	20.5518	20.7743	19.6083	20.1205
PE(18:0_18:2)	Negative	0.91603	0.0525287	0	21.4381	21.3856	20.9336	20.763	21.7523	21.7352	21.2184	21.3801	20.8072	20.7897	21.2607	20.997	21.1778	21.0272	22.0185	22.1094	21.4468	21.379	22.1995	22.1582	22.1279	22.2698	20.9092	20.979	21.8993	21.8683	20.985	20.9254	22.1117	21.8918	20.1466	20.5601	21.0251	21.0694	21.6478	21.6983	21.9559	21.9486	21.7227	21.5999	21.8069	21.7078	21.5903	20.6557	21.0633
PE(18:0_20:3)	Negative	0.91603	0.0278201	0	18.9735	18.9457	18.3308	18.2534	19.3127	19.0828	19.0963	19.0599	18.4767	18.6151	18.4488	18.627	19.0831	19.1359	19.7531	19.6043	18.6782	18.9887	18.8474	19.0383	19.2238	19.3141	18.5396	18.675	19.0596	18.9948	19.244	19.3123	18.834	18.852	17.819	17.8855	18.2605	17.8573	19.3158	19.4622	18.8579	18.7035	19.6959	19.4075	19.9093	19.7978	19.0928	18.4991	19.2954
PE(18:0_20:4)	Negative	0.91603	-0.0363406	0	21.9837	22.0201	21.4835	21.4253	21.8767	21.9388	22.0681	22.3609	21.5883	21.8174	21.3167	21.224	21.8078	21.918	22.3845	22.5022	21.5546	22.0298	21.6061	21.5427	22.3186	22.3059	21.638	21.9245	22.3106	22.2968	22.1	22.1101	22.3047	22.1624	21.1505	21.289	21.671	21.6317	21.9715	22.055	22.6095	22.4465	22.58	22.5165	22.8203	22.5954	21.9986	21.7966	22.3359
PE(18:0_22:5)_A	Negative	0.91603	0.0248276	0	17.8897	17.8649	17.5603	17.6337	18.5312	18.3822	18.2602	18.1639	17.1784	17.4239	17.1811	17.0773	17.6496	17.5627	18.3529	18.4476	17.5328	17.6023	17.5511	17.4257	18.561	18.5357	17.769	17.4234	18.1824	17.9767	18.0377	18.1947	17.7819	17.768	16.8549	17.0675	17.0839	16.73	17.9505	17.8783	18.1332	18.2913	17.7352	17.6976	18.8134	18.6721	17.9843	18.0338	18.475
PE(18:0_22:5)_B	Negative	0.91603	0.0478305	0	17.1155	17.0677	15.526	15.5825	18.0708	17.8373	16.7947	16.7999	16.3054	16.4812	16.2911	16.386	16.7597	16.6915	18.0491	17.8555	15.9788	16.5445	16.6627	16.8235	17.2992	17.5284	16.5906	16.7349	15.3611	15.2373	16.9891	17.1622	17.8019	17.7323	15.8516	16.0902	16.9483	16.4164	17.8497	18.1431	16.9522	16.5154	17.4296	17.0726	18.7587	18.7328	17.2176	15.7543	17.6171
PE(18:0_22:6)	Negative	0.91603	-0.0558706	0	20.3782	20.4341	20.1715	20.2062	20.7206	20.5037	19.7978	19.8362	19.9929	20.2806	19.4033	19.4853	20.173	20.1533	21.4099	21.226	19.6755	19.8448	20.3212	20.1442	19.639	19.9755	20.094	20.2691	20.947	20.8611	20.8399	20.9104	19.8421	19.8088	18.9299	19.2496	20.1622	19.9653	19.4244	19.6284	20.9374	21.0508	21.4238	21.4411	21.5622	21.3678	20.4051	21.0511	21.9125
PE(18:1/18:1)	Negative	0.91603	0.106325	0	18.6343	18.528	17.8852	17.755	19.4641	19.5356	19.4154	19.6792	18.6436	18.4369	18.5551	17.8252	18.1528	17.6644	18.4608	18.8988	20.1256	20.15	19.0143	19.7057	19.7413	20.1734	18.0176	17.9173	18.0277	17.8186	18.3952	18.2633	19.6414	19.3221	17.741	18.0908	17.3663	17.3681	18.8154	18.6937	19.4385	19.3865	18.1255	17.8156	19.542	19.1695	19.6766	18.1522	18.0665
PE(18:1_22:6)	Negative	0.91603	-0.0628181	0	18.2925	18.3554	18.3386	18.5347	17.9987	17.7391	18.7478	18.7058	17.9364	17.8904	17.244	17.737	18.2356	18.2944	18.9714	18.5421	18.2024	18.2752	17.4235	17.5929	16.8692	17.2359	18.0441	18.0635	18.4362	18.38	18.7844	19.1135	17.8382	18.2357	17.665	17.8198	17.2663	17.1866	17.7905	17.935	18.8607	18.8502	19.4993	19.3975	20.192	19.6821	18.3799	18.9603	20.1188
PE(18:2/18:2)	Negative	0.91603	0.157698	0	15.6508	15.4931	14.4843	14.3743	17.4504	17.5611	15.1121	15.8192	15.0957	14.9409	16.6949	15.7928	14.922	14.65	15.9959	16.4663	16.3166	16.4837	17.6812	18.2434	17.1503	17.8586	14.7027	13.8768	17.0308	16.6474	14.08	13.6952	16.4099	16.5348	13.9349	13.9724	14.8155	14.709	15.856	15.8548	16.8865	17.3694	15.5231	15.4512	15.2801	15.1889	17.6086	14.5269	13.1131
PE(20:5_0:0)	Negative	0.91603	-0.0789432	0	14.3349	14.4139	15.0042	14.2208	14.4921	14.7729	14.0404	14.22	14.6838	14.5357	14.393	13.976	14.9882	14.7633	13.9854	13.717	15.2365	15.3767	13.7534	14.5832	14.5955	14.9805	13.3972	14.1008	14.4911	14.8511	14.6265	13.919	13.39	13.7543	14.7214	14.3629	14.415	14.5943	13.6434	14.2198	14.2666	14.1897	14.0604	14.7017	13.8554	13.8342	15.0413	15.9235	16.1687
PE(22:6_0:0)	Negative	0.91603	-0.0729032	0	18.2998	18.3727	18.41	18.2431	18.1659	17.9098	18.0632	18.2695	18.609	18.3517	18.2429	18.538	18.6434	18.6858	18.3108	18.2382	18.2392	18.6306	18.3972	18.229	17.4278	17.3633	18.6774	18.2075	18.7493	18.8858	18.8258	18.7081	18.5107	18.5668	18.5672	18.6099	17.6067	18.3359	17.6982	17.5057	18.0629	18.5629	17.8639	18.5386	18.0905	18.2794	18.2742	19.405	19.4235
PE(O-18:0/20:4)_A	Negative	0.91603	-0.0275675	0	17.6929	17.7205	17.9608	17.9136	16.6965	16.9151	17.707	17.8742	18.1749	18.236	17.6249	17.8413	18.0571	18.0832	16.8867	16.8326	17.4271	17.8172	17.1632	16.8018	17.7435	17.8448	17.8413	18.048	18.5036	18.381	17.6831	17.6788	17.9978	17.8977	18.8925	18.9572	18.069	18.0631	17.5316	17.405	18.0459	18.1984	17.2304	17.232	17.3434	17.3821	17.0335	17.5472	17.8013
PE(P-18:0/16:0)_A	Negative	0.91603	0.0504383	0	16.0698	16.0193	16.3352	15.9362	16.1522	16.3577	16.3622	16.3871	16.6326	16.5245	16.191	16.2065	16.5472	16.6343	15.3763	15.217	16.4364	16.6857	15.6575	15.5618	15.9297	15.7724	15.834	15.9434	16.4761	16.2296	15.9509	16.0168	16.2518	16.2235	16.6357	16.7352	15.6319	15.8323	16.0175	15.8167	16.1423	16.0453	15.4121	15.4052	16.0402	15.8114	16.2986	15.6262	16.1735
PE(P-18:0/16:0)_B	Negative	0.91603	-0.0267415	0	16.0488	16.0756	16.2568	16.1523	15.3958	15.2671	16.1363	16.5653	16.1584	16.2137	16.1969	16.4453	16.94	17.1212	15.2668	15.2121	15.212	15.2438	15.7656	15.4648	16.7591	16.588	16.0502	16.0879	16.2342	16.4564	15.6884	15.4196	15.7504	15.912	16.9615	16.7686	16.1309	16.0313	15.6788	15.825	15.8338	15.9347	16.2488	15.9277	16.2154	16.0233	15.8907	16.1347	16.3134
PE(P-18:0/20:4)_B	Negative	0.91603	-0.0376388	0	22.5071	22.5448	22.6854	22.5039	21.6017	21.4194	22.4925	22.7538	22.6947	22.845	22.9565	23.0899	23.1403	23.1607	21.7291	21.796	21.9459	22.0796	21.9072	21.6477	22.7785	22.6586	22.6565	22.7973	22.8859	22.8666	22.1557	22.0955	22.3655	22.3532	23.1326	23.1771	23.0388	22.8745	21.9498	22.1045	22.8829	22.7153	22.5506	22.7929	22.6731	22.6024	21.8144	22.93	22.6106
PE(P-18:0/20:5)	Negative	0.91603	-0.0607033	0	19.6398	19.7005	20.9047	20.85	19.3207	19.2696	18.8781	19.0216	20.314	20.1188	19.949	20.2367	20.2656	20.1797	18.9134	18.7403	19.878	19.9003	19.493	19.3241	19.1642	19.2411	19.2559	19.3197	19.8378	19.8398	19.0906	19.0752	18.8406	18.7396	20.2539	20.2903	20.2483	20.2274	19.0127	19.1189	19.4561	19.4336	19.5336	19.5143	19.1177	18.8643	19.924	21.989	21.2384
PE(P-18:0/22:4)	Negative	0.91603	-0.046874	0	17.7992	17.846	17.191	17.1987	17.0635	16.8887	18.1897	18.1866	17.6769	18.0677	17.7905	17.9557	18.6038	18.6095	17.4368	17.5356	17.9595	18.1543	17.2504	17.1878	17.9545	18.2033	18.0161	17.7464	17.2318	17.3972	17.807	17.68	18.508	18.5764	18.2015	18.34	18.0854	18.0926	17.8156	18.1873	17.8583	17.7767	17.2896	17.1366	18.1058	17.9292	17.4682	17.3933	17.3239
PE(P-18:0/22:5)_A	Negative	0.91603	-0.0513974	0	19.268	19.3194	19.6019	19.4237	20.2417	20.1037	19.1847	19.1573	19.2424	19.2521	19.6523	19.6068	19.6267	19.6761	19.879	19.9434	19.0798	19.4051	18.8613	18.5209	19.3286	19.2515	19.4463	19.449	18.9786	18.8843	18.9247	18.7998	19.145	19.1991	19.3717	19.2423	19.5249	19.4082	19.0789	19.1997	19.2934	19.2674	18.8581	19.0116	18.9712	18.7531	18.9865	20.6561	19.2893
PE(P-18:0/22:5)_B;PE(P-20:0/20:5)	Negative	0.91603	-0.0575545	0	17.6718	17.7293	17.894	17.8316	17.081	17.2114	17.1583	17.3228	17.6735	17.861	18.8705	18.9599	17.7862	17.7777	17.1377	16.9679	17.6459	17.8216	17.4144	17.0151	17.5486	17.3156	17.531	17.5246	16.46	16.5624	17.1511	17.1282	18.0242	18.1391	18.2011	18.1355	18.3011	18.2537	17.5253	17.5793	17.1241	16.9962	17.3647	17.4131	17.7541	17.6221	17.3725	18.6739	18.3993
PE(P-18:0/22:6)	Negative	0.91603	-0.0569524	0	21.0463	21.1032	21.5726	21.6216	20.3359	20.3039	20.5295	20.648	21.2269	21.2457	21.5938	21.742	21.4969	21.4279	20.757	20.7187	20.7231	20.9403	20.9352	20.6663	20.1858	20.193	21.4478	21.3114	21.5765	21.5634	20.8672	20.8864	20.7277	20.6846	21.4077	21.4594	21.4622	21.3423	19.9501	20.1989	21.0459	21.1803	21.6713	21.6489	21.0009	20.9254	20.5549	21.8947	21.7052
PE(P-18:1/22:6)	Negative	0.91603	-0.0391573	0	19.6134	19.6525	20.0949	19.9195	18.8296	18.6451	19.2342	19.3564	20.1551	20.0742	20.0242	20.2005	20.1601	20.0838	19.0186	19.0028	20.0279	20.0535	19.3446	19.1315	18.2349	18.2863	19.8899	20.1212	20.2686	20.2517	19.7912	19.7609	19.1375	19.1122	20.4972	20.4966	19.7957	19.8562	18.5656	18.7596	19.8556	20.006	20.2939	20.297	19.1875	19.1315	19.0767	20.0396	20.1539
PE(P-20:0/18:2)	Negative	0.91603	0.0235405	0	18.0322	18.0087	17.7997	18.0808	17.5269	17.3384	17.9283	18.1244	18.2667	18.2056	18.2901	18.5171	18.0764	18.1052	17.5465	17.4278	17.9809	17.9614	18.4782	18.2422	18.2067	18.28	18.2103	18.435	17.365	17.4644	17.7516	17.5855	18.8643	18.8821	18.2472	18.1267	18.1268	18.0041	17.6886	17.6954	18.0996	17.9246	18.2596	18.2708	18.1212	17.9892	17.5213	17.429	17.6563
PE(P-20:0/20:4)	Negative	0.91603	-0.0920688	0	19.2651	19.3571	18.9979	19.1241	18.6422	18.4778	18.6358	18.7951	19.7467	19.7255	19.7683	19.8918	19.7435	19.6747	18.7722	18.5463	18.9469	19.3057	18.7742	18.3956	19.1175	19.1051	19.4214	19.4606	18.8186	18.6551	19.2384	19.0602	20.0285	20.2177	19.7853	20.0739	19.7437	19.559	18.15	18.5771	19.4812	19.6735	19.3877	19.4519	19.512	19.4208	18.4019	19.7398	19.398
PI(16:0_16:1);PI(14:1_18:0)	Negative	0.91603	0.0626002	0	14.8651	14.8025	14.5372	14.5349	16.0394	16.0327	12.8029	12.9233	14.0479	13.9848	13.8709	14.0893	14.8617	15.2426	15.6335	15.9844	13.8232	13.4053	15.2914	15.2685	14.7579	14.8424	14.5421	14.3831	13.2753	13.2471	14.9659	14.986	13.6405	13.3757	14.4786	14.7328	16.3002	16.2181	16.5192	16.6515	13.9726	14.1005	15.4271	15.2111	14.0505	14.4737	16.221	14.1429	15.2743
PI(16:0_18:1);PI(16:1_18:0)	Negative	0.91603	0.093917	0	17.9123	17.8184	18.3157	18.1985	18.4157	18.3614	17.7276	17.4123	17.4449	17.2003	17.254	17.5688	17.9154	18.0367	17.5487	17.9948	18.0418	17.9632	18.526	18.2126	18.4545	18.2409	18.2313	18.1261	17.1948	17.143	17.8885	17.9759	18.083	17.701	17.7164	17.896	18.12	18.0682	18.2305	18.5633	17.5665	17.2959	17.7435	17.6726	17.1241	17.1795	18.5654	17.3727	17.9336
PI(16:0_18:2)	Negative	0.91603	0.06409	0	18.0623	17.9982	17.6733	17.8919	18.4781	18.4723	17.4365	17.5307	17.7972	17.6425	18.1909	18.1354	17.6705	17.476	18.2155	18.3329	17.8737	17.909	19.0894	18.7693	18.2966	18.179	18.4776	18.5365	18.2705	18.3207	18.135	18.2469	18.0122	17.9449	17.0973	17.4531	18.5757	18.3521	18.8514	18.8985	17.667	17.5411	18.2012	18.0736	17.5291	17.0704	17.9363	17.2421	17.0259
PI(18:0_18:1)	Negative	0.91603	0.0657793	0	18.4289	18.3632	19.1156	19.1298	18.4526	18.2182	18.378	18.5448	18.5543	18.5339	17.7764	17.8309	18.9321	18.853	17.5575	17.8111	19.1436	19.0879	18.923	18.731	18.9597	18.8358	19.1606	19.1178	18.0581	18.1985	17.9501	17.9508	19.132	18.7729	18.3729	18.4958	18.1811	18.3412	18.4117	18.4197	18.4633	18.3914	18.4864	18.3621	18.0395	17.9151	18.3949	18.0388	18.5139
PI(18:0_20:3)_B	Negative	0.91603	0.100492	0	16.5655	16.465	16.8876	17.1534	16.3714	16.281	16.1968	15.9497	16.094	15.9672	15.9542	16.127	17.1289	16.8958	15.8838	16.1305	17.5063	17.4608	15.9971	15.4692	16.1655	15.9584	16.8777	16.8769	16.0038	15.8359	16.9002	16.7987	17.0283	16.8783	16.3037	16.5589	16.1095	15.956	17.4629	17.5187	15.9429	16.2024	16.8209	16.8028	15.9408	15.7473	17.339	16.1618	17.895
PI(18:0_22:5)	Negative	0.91603	-0.0319508	0	16.4602	16.4922	17.3269	17.3743	17.0918	17.0297	16.0537	15.9956	16.1133	16.1188	16.1058	16.4283	16.6775	16.5644	16.6388	16.8587	16.3033	16.2864	16.7812	16.516	16.5073	16.426	17.0008	17.1359	16.7703	16.9689	16.3796	16.1699	16.0761	16.1054	15.5559	15.6781	16.458	16.4135	16.4506	16.7282	16.5182	16.2561	16.497	16.1992	16.1359	16.3348	16.2181	16.5705	17.4449
PI(18:1_20:4)_B;PI(18:0_20:5)	Negative	0.91603	-0.0303889	0	16.3052	16.3356	16.6393	16.8734	15.9908	15.9677	16.6031	16.5488	15.0373	14.9648	16.2967	16.5057	16.7749	16.6519	15.6061	15.6443	16.7811	16.6738	16.4623	16.3739	16.1552	16.0889	16.4079	16.4981	15.412	15.8691	17.0374	17.002	16.7744	16.6739	16.7309	16.7292	15.9003	16.1838	17.0695	17.0578	16.0936	16.1605	16.8282	16.9995	15.863	15.921	16.0646	15.2821	15.9139
PC(18:0_20:5)	Positive	0.916688	-0.0142104	0	22.8347	22.8489	23.4028	23.4397	22.9181	22.8647	22.1971	22.052	23.2602	23.2676	22.6995	22.6824	22.7061	22.6836	22.6441	22.4788	23.3287	23.5197	22.6273	22.3116	22.6616	22.599	22.6257	22.5919	23.3128	23.1933	23.1407	23.0779	22.3724	22.5457	23.0107	22.9452	23.3826	23.1532	22.1913	22.291	22.4617	22.4465	22.6593	22.6147	22.4125	22.4275	23.2026	24.385	23.971
PC(20:4_22:6)	Positive	0.916688	0.00925857	0	17.1594	17.1502	17.6618	17.7074	17.1045	17.1064	17.1563	16.9042	17.5085	17.477	17.4402	17.5245	17.3453	17.2008	17.5102	17.3632	16.5191	16.7765	16.6373	16.6859	16.1721	16.1278	17.4966	17.2366	17.5312	17.4283	17.1743	17.0634	17.1857	17.3826	16.9877	16.8731	17.3802	17.2513	16.7481	16.9358	17.2205	17.3213	17.3714	17.2153	17.0563	16.9717	17.5097	18.0352	17.7831
Cer(d18:0/22:0)	Negative	0.917388	-0.0264081	0	16.0309	16.0573	15.7896	15.7738	16.2617	16.0638	14.7298	14.8573	15.4217	15.5585	15.7259	15.7661	15.0641	14.9793	16.4203	16.4961	15.6355	15.5902	16.4104	16.5344	17.2094	16.9908	16.3354	16.103	15.4239	15.5295	15.0825	15.1652	15.5227	15.7717	15.991	16.1774	16.6104	16.9515	15.3278	15.2961	16.4873	16.0124	16.1509	15.746	16.8632	16.5228	16.2225	16.998	15.8203
HexCer(d18:1/24:0)	Negative	0.917388	0.0264335	0	19.0257	18.9993	19.8209	19.9279	18.7342	18.5382	18.7527	18.8414	18.4246	18.6033	19.069	19.3366	18.7186	18.7669	18.6138	18.3545	19.6549	19.7406	19.0774	18.7867	19.0619	18.9256	19.9043	20.1216	18.4725	18.2845	19.9013	19.6943	19.2794	19.2096	18.9021	18.6298	19.9404	19.9024	19.1715	19.2238	19.5876	19.5674	18.6717	18.7343	18.5238	18.4356	18.7386	18.3334	18.3395
PE(16:0_20:3)_A	Negative	0.917388	-0.0135504	0	17.5287	17.5422	17.186	17.3855	17.7287	17.6583	18.0152	17.8789	16.6492	16.7458	16.7841	16.7896	17.2652	17.3607	18.2261	18.1837	16.8973	17.0214	17.3748	17.1531	17.4853	17.8647	17.2047	16.9883	17.7542	17.9002	17.4518	17.5823	17.7229	17.6723	16.408	16.7738	17.5457	17.4506	17.6837	17.804	17.5005	17.7569	18.0034	17.8175	18.4638	18.2859	17.9059	17.5348	17.8102
PE(16:0_20:3)_B;PE(18:1_18:2)_B	Negative	0.917388	0.0288543	0	17.5329	17.504	16.6326	16.7164	17.3663	17.232	18.0523	18.0125	16.1426	16.2278	17.2936	17.0495	17.3523	17.1517	18.0325	18.2259	17.505	17.6288	18.5124	18.7525	18.4689	18.8928	16.907	17.0494	17.3638	17.364	17.6079	17.7414	18.1892	18.4981	16.2866	16.6236	16.8249	16.6722	18.0915	17.9921	17.4906	17.5456	17.9737	17.842	18.4345	18.2534	18.0515	16.5729	17.3044
PE(18:0_20:5);PE(16:0_22:5)	Negative	0.917388	-0.012736	0	18.0803	18.093	18.0597	18.1429	18.6694	18.4469	17.6002	17.5274	17.4106	17.3018	17.0503	17.261	17.9533	17.9261	18.407	18.4483	18.0292	18.1522	17.8246	17.6313	18.0601	18.2383	17.3506	17.3531	18.2204	18.2037	17.8361	17.9733	17.9886	18.0577	16.6579	16.8846	17.7577	17.6036	18.3386	18.4914	17.5751	17.8121	18.4291	18.3353	19.0358	19.1511	18.9502	19.0549	19.586
PE(18:1_0:0)	Negative	0.917388	-0.0224567	0	17.8082	17.8306	17.5889	17.3742	17.9697	18.3521	18.6456	19.097	17.9071	18.0705	18.1972	18.081	17.7953	17.5749	17.2934	17.9042	19.0427	19.3056	17.9726	18.0714	18.5203	18.7586	17.5724	17.3233	17.2313	17.5007	18.1196	18.0801	18.9034	18.9793	18.1202	18.193	16.4898	16.9168	18.3539	17.8681	17.6704	17.7329	16.7458	16.832	17.8572	17.5649	18.6024	17.7849	17.352
PE(18:1_18:2)_A	Negative	0.917388	0.0516893	0	19.2198	19.1681	18.3857	18.5257	20.0147	20.0593	19.7365	19.717	18.6769	18.4677	19.2673	18.6868	18.6711	18.5582	19.401	19.9838	20.1502	19.9336	20.1798	20.441	20.1063	20.5313	18.6564	18.5174	19.3475	19.3691	18.5613	18.6304	19.9993	20.0602	18.2108	18.6621	18.3391	18.1879	19.7063	19.6989	19.645	19.913	19.304	19.0196	19.8669	19.6769	20.296	18.4417	18.1687
PE(18:2_0:0)	Negative	0.917388	-0.0379363	0	18.6084	18.6463	18.1005	18.333	18.718	18.3458	18.8283	19.1395	18.5792	18.3152	19.0259	19.1144	18.5142	18.4915	18.4383	18.4422	18.764	19.2219	19.6114	19.4805	19.4687	19.4747	18.702	18.1754	19.1278	19.1482	18.3568	18.3913	19.7144	19.7222	18.3905	18.7369	18.3158	18.5038	19.0632	19.0188	18.3855	18.2432	17.9263	18.506	18.2955	18.4041	19.1906	18.2894	16.9573
PE(O-16:0/22:6)	Negative	0.917388	0.0206899	0	18.3028	18.2821	18.4779	18.3934	18.4495	18.4106	17.8407	17.8486	18.9386	18.9356	18.8592	18.9289	18.5069	18.4097	17.7119	17.7476	18.1509	18.3935	17.8174	17.746	16.6449	16.9299	17.9159	17.9835	19.3631	19.1984	17.9687	18.0141	18.0525	17.8906	18.9834	18.9724	18.9339	18.9924	17.8949	17.8023	18.2006	18.3676	18.236	18.1708	17.9995	17.858	18.1862	18.9675	19.3761
PE(O-18:0/20:4)_B	Negative	0.917388	-0.037018	0	18.6853	18.7223	19.4918	19.2838	19.3284	19.218	18.6713	18.6476	18.95	19.0234	19.7998	20.0313	18.7766	18.7276	18.7619	18.7423	17.7697	17.6896	18.0041	17.6672	18.0657	18.0125	18.1486	18.1045	18.7962	18.5746	17.8878	18.0546	18.5674	18.5034	19.0716	18.9645	20.1643	20.1403	18.2477	18.2593	18.2222	18.1409	18.2532	18.3319	18.5723	18.4858	17.9286	19.8821	18.7643
PE(P-16:0/18:1)	Negative	0.917388	-0.0100719	0	19.2085	19.2186	19.1514	19.176	18.635	18.5234	19.4015	19.5846	19.5568	19.4926	19.2784	19.29	19.8105	19.8005	18.6038	18.7521	19.3812	19.5748	18.7691	18.4309	19.0829	19.153	19.4121	19.3439	18.8808	18.8919	19.1266	19.0728	19.2502	19.1954	19.8464	20.0282	19.1834	19.2666	18.8219	18.8628	19.3787	19.3059	19.3813	19.3538	19.2583	19.182	19.1299	19.2472	19.8573
PE(P-16:0/20:4)	Negative	0.917388	-0.0163096	0	21.8044	21.8207	21.5755	21.6221	21.071	20.997	21.6984	21.7968	22.1097	22.2491	22.2087	22.4309	22.2276	22.3003	20.9942	20.9768	21.4156	21.6928	20.909	20.6723	21.6566	21.6714	21.8197	21.7522	22.2705	22.2139	21.9366	21.7642	21.4481	21.4524	22.7251	22.7514	22.0812	22.086	21.0116	21.0565	22.5595	22.6362	22.2456	22.1509	21.8517	21.7334	21.3081	22.0478	22.1735
PE(P-16:0/20:5)	Negative	0.917388	-0.0345786	0	19.3745	19.4091	20.3319	20.3477	19.26	19.075	18.094	18.255	20.3917	20.3069	19.2954	19.868	19.598	19.6593	18.5454	18.2824	20.2341	20.5195	19.0508	19.0537	18.4062	18.6084	18.9857	18.8523	19.7901	19.4844	19.2556	19.315	17.4997	17.7136	20.5271	20.4484	19.9298	19.8213	18.0164	18.1872	19.852	19.7739	19.7802	19.6618	18.8767	18.1882	20.2679	21.8437	21.7819
PE(P-16:0/22:4)	Negative	0.917388	0.0351568	0	18.1776	18.1424	18.2287	18.1324	18.1473	17.9389	18.3577	18.5135	18.9546	19.089	18.5588	18.7762	18.6594	18.6045	16.7638	16.8556	17.5729	18.0607	17.1786	16.8053	17.0897	17.2938	17.7301	17.5497	19.2303	19.2403	17.5545	17.8206	18.0648	18.0556	19.3272	19.3909	18.9782	19.0115	18.7239	18.7133	18.5148	18.0681	18.2461	17.2256	17.8183	17.5591	17.9174	18.4307	18.214
PE(P-18:0/18:2)_B	Negative	0.917388	0.00883168	0	21.0801	21.0713	21.4132	21.2573	20.0656	20.0636	21.532	21.6218	21.0466	21.2035	21.4085	21.6791	21.6798	21.7241	20.5181	20.5383	20.5452	20.6804	21.354	21.1194	21.4671	21.4548	21.1993	21.2003	21.4301	21.2954	20.4819	20.4863	21.3182	21.232	21.2426	21.2392	21.4128	21.3508	21.0795	21.1628	20.8885	20.7874	21.1848	21.1958	21.2103	21.0958	20.4847	20.6901	20.8018
PE(P-20:0/22:6)	Negative	0.917388	-0.03166	0	17.5134	17.545	17.828	17.9864	16.9089	16.9857	16.6649	16.7774	17.7147	17.6181	18.0621	18.2692	17.5412	17.9034	17.4527	17.6181	17.6976	17.6638	17.5914	17.2002	16.4031	16.3095	18.0775	18.1474	17.8321	17.4217	17.5263	17.3268	17.8885	17.7543	17.66	17.7726	17.5763	17.5504	16.0987	15.9523	17.3187	17.3138	18.2056	18.3027	17.3324	16.9538	16.7534	18.1419	18.0567
PI(16:0_20:4)	Negative	0.917388	0.0161982	0	18.3958	18.3796	18.2129	18.3854	18.8095	18.8542	17.8499	17.7759	17.5985	17.7181	17.866	18.09	18.0306	18.1472	18.2522	18.6598	18.2703	18.2734	18.6159	18.3542	18.5306	18.0139	18.4402	18.3712	17.6992	18.0494	19.0887	19.1629	18.3219	18.1308	18.2308	17.9617	18.6066	18.7685	18.9989	19.0799	18.2408	18.1823	18.5767	18.6813	18.1461	18.0416	18.5594	18.1268	18.6431
PI(18:0_20:3)_A	Negative	0.917388	0.00949406	0	18.9252	18.9157	19.291	19.3911	18.5458	18.4811	18.3031	18.3281	18.7222	18.7363	18.6997	18.7317	18.6949	19.0001	18.9151	18.9531	19.5459	19.8037	18.8943	18.8826	18.6293	18.4765	19.5468	19.4422	19.0109	19.1327	18.8043	18.763	18.9904	18.7798	18.4511	18.4099	18.5461	18.4465	19.4393	19.3694	19.1347	18.9176	19.6496	19.7162	18.7826	18.8195	18.3692	18.4245	19.5776
PI(18:0_22:6)	Negative	0.917388	0.0212401	0	17.1259	17.1046	18.0922	18.1794	17.0444	16.9923	16.0766	15.7325	17.057	16.8714	16.7802	16.7906	17.3388	17.2676	17.1837	17.3386	16.9061	16.79	17.8333	17.3611	16.2278	16.1105	17.8364	17.9682	17.4033	17.5413	17.891	17.8815	16.1881	16.1524	16.459	16.6537	17.4269	17.1709	16.7602	16.7343	17.1594	17.266	18.1881	17.8524	16.6583	16.5521	16.8899	17.3712	18.2508
PC(0:0_18:0)_A	Positive	0.918081	0.0136078	0	19.135	19.1214	19.5248	19.5343	19.2613	19.3144	19.857	19.2788	19.3683	19.6827	19.55	19.5457	19.2838	19.3512	18.728	18.7262	19.3952	19.3426	19.1606	19.0188	18.9	18.8853	18.998	18.7297	19.6755	19.8408	19.6164	19.2126	19.7928	19.9365	18.991	18.8741	18.6013	18.7431	19.4416	19.756	19.0327	19.2102	18.3219	17.9419	19.0413	18.7647	18.4273	19.0207	18.5781
PC(18:3_0:0)	Positive	0.918081	0.0124992	0	16.6753	16.6628	16.1025	16.1089	16.9745	16.9671	16.9393	16.8084	17.1212	16.8186	17.3364	17.4912	16.8392	16.762	15.9526	16.0797	17.0861	17.099	16.638	16.3168	16.9233	16.9859	16.6155	16.3116	17.1645	17.0109	17.5644	17.5666	16.8697	16.8647	16.8974	16.8027	16.3658	16.6875	16.2492	16.5377	16.5382	16.6434	15.9065	16.037	16.3289	16.1401	16.7646	16.8424	16.0237
TG(52:5)	Positive	0.918081	0.00600371	0	22.8848	22.8788	22.2679	22.2483	23.2535	23.253	22.7842	22.8237	22.8895	23.0524	23.229	23.1105	22.4596	22.3617	22.934	22.9969	22.494	22.7373	23.4586	23.2802	23.1536	23.2766	22.7347	22.4932	24.1207	24.1107	23.1079	23.1035	22.9272	22.9924	21.9678	22.0549	22.4125	22.2252	22.9807	22.9837	23.8203	23.9222	23.1499	23.1413	23.1045	22.9534	22.0487	22.0403	21.9665
PE(P-16:0/22:6)	Negative	0.920968	0.0126593	0	21.02	21.0074	21.1431	21.1811	20.5753	20.4129	20.5157	20.477	21.3385	21.3835	21.4319	21.578	21.1135	21.2014	20.8609	20.8879	20.8221	21.0556	20.7419	20.3905	19.9874	19.9678	21.3374	21.1894	21.7281	21.5238	21.0874	20.9002	20.5454	20.5438	21.4672	21.3743	21.4064	21.401	20.0754	20.115	21.3869	21.3599	21.608	21.4732	20.8453	20.6924	20.686	21.4287	21.8366
PI(16:0_22:6)	Negative	0.920968	-0.0202965	0	15.0936	15.1139	15.691	15.9229	15.4457	15.5155	14.2472	13.8102	15.1302	14.6971	14.6478	15.1835	15.1255	14.732	15.392	15.4538	15.1951	15.2084	15.9977	15.8752	14.4859	14.1019	15.6315	15.8547	15.2808	15.4985	15.9561	16.0716	14.2648	14.0566	14.2993	14.578	15.1418	15.4237	14.8118	15.2139	14.6128	14.5442	15.4612	15.4563	14.3758	14.2325	15.3586	14.9855	15.4825
PE(P-18:0/18:2)_A	Negative	0.921288	-0.0104322	0	17.2622	17.2726	17.63	17.6044	16.2662	16.4572	17.0181	17.194	17.2715	17.6341	17.066	17.2843	17.4007	17.3145	16.6057	16.5475	17.5572	17.6369	17.3912	17.125	17.8834	17.8537	17.8538	18.0088	17.8231	17.6494	17.0828	16.8282	16.9959	17.1757	17.4182	17.3304	17.7748	17.6886	16.9984	16.9829	17.5953	17.3915	17.8975	17.9341	16.7532	16.7804	17.1454	17.5091	17.1371
PC(P-16:0/20:4)	Positive	0.921961	0.0086101	0	22.7168	22.7082	22.6924	22.8483	21.8153	21.7657	22.7398	22.6742	23.1635	23.1493	22.7639	22.8311	22.9331	22.9492	22.3892	22.2339	22.2437	22.2694	22.3361	21.9617	22.6277	22.4892	22.9314	23.0442	23.214	23.0464	22.6221	22.5183	22.9086	22.9117	23.5312	23.4229	23.4694	23.2662	22.2278	22.3117	23.0533	22.972	22.6423	22.7188	22.6225	22.5592	22.4444	23.1277	22.1259
SM(d18:1/22:0)	Positive	0.921961	0.00852194	0	24.2063	24.1978	24.4087	24.2221	23.6989	23.6476	23.8814	23.8986	24.3382	24.324	24.2063	24.2513	23.6099	23.5561	24.3682	24.2419	24.202	24.3849	24.663	24.4037	24.1359	24.0774	24.3183	24.3634	24.1456	23.9722	24.1295	23.9854	24.6276	24.8813	24.3119	24.1484	24.7	24.4957	24.0259	24.0675	24.4054	24.2264	24.0765	24.1342	24.323	24.3356	23.6387	24.2824	23.9634
TG(51:1)	Positive	0.921961	0.026011	0	19.587	19.5609	18.852	18.9145	21.2494	20.9756	19.7104	19.8923	18.5132	18.8516	18.7455	17.7099	20.1162	20.2089	20.8181	20.8552	18.0968	18.4364	20.4657	20.7287	20.1287	20.2121	18.9487	18.8521	19.3013	19.401	19.7685	19.5389	19.2029	19.2935	18.406	19.0166	19.1244	18.8435	20.0803	20.1673	18.5777	19.2413	19.3574	18.8497	20.2676	20.3829	20.3774	18.3033	19.6155
Cer(d18:1/26:0)	Negative	0.923903	-0.0254783	0	15.988	16.0134	16.6599	16.5628	15.247	14.9246	15.3601	15.8581	15.9308	15.6653	15.1933	16.2319	14.8173	15.5176	15.5695	15.9753	16.1262	15.8028	16.4604	16.1275	16.7591	16.786	16.7587	16.4647	15.9555	15.9958	15.9055	15.6614	16.3134	16.3912	16.5082	15.7047	15.7748	15.6116	15.9252	15.9272	16.1504	16.4709	16.4371	16.5412	16.4091	16.0802	15.7152	16.5882	16.4244
PE(18:1_20:4);PE(16:0_22:5)	Negative	0.923903	-0.010051	0	19.3375	19.3475	19.0976	18.9482	19.0326	18.7931	20.47	20.5575	18.7134	18.669	18.7936	18.9408	19.2525	19.2534	19.4072	19.4437	19.4642	19.7077	18.2994	18.4275	19.5163	19.719	18.7964	19.0786	19.4233	19.2702	19.486	19.6491	19.7689	19.7541	18.6962	19.0033	18.5204	18.387	19.3905	19.5723	19.893	19.6465	19.6048	19.3645	20.7078	20.5109	19.4605	19.2205	19.6843
DG(16:0_18:2_0:0)	Positive	0.925267	0.0134813	0	18.9842	18.9707	18.4026	18.3376	20.5057	20.5724	18.7017	18.6369	18.62	18.8399	18.2275	18.0479	18.9427	18.8113	19.3372	19.5375	17.9626	18.1405	19.561	19.7814	19.023	19.1167	18.6954	18.4684	19.7321	19.8778	18.8085	18.6882	19.0326	19.0448	17.4203	17.7117	18.6611	18.5185	19.5391	19.4318	19.1665	19.826	18.7821	18.71	19.609	19.3969	19.2116	18.1121	18.5444
DG(16:0_18:1_0:0)	Positive	0.935146	0.014348	0	19.1471	19.1328	18.7408	18.7147	20.9622	20.7823	19.2614	19.3875	18.6289	18.8545	17.9531	17.6128	19.5792	19.5759	19.6004	19.8393	18.3108	18.4515	19.2961	19.4788	19.2132	19.2852	18.8031	18.7444	19.2257	19.2147	19.3155	19.2704	18.9432	18.9685	17.9164	18.592	18.7696	18.5603	19.6915	19.6077	18.9877	19.378	18.4512	18.3279	19.7705	19.7491	19.8905	18.3248	19.2389
DG(18:1_20:4_0:0)	Positive	0.935146	0.00755083	0	17.8134	17.8059	16.9353	16.7828	19.2258	19.3624	17.8435	18.1372	18.0339	17.9334	17.0853	17.136	18.0484	17.941	17.3509	17.058	17.3287	17.5709	16.6952	16.6925	18.285	18.2833	17.2464	17.2854	17.3685	17.0967	18.4004	18.3143	17.6106	17.9659	17.5545	17.5647	17.7713	17.3376	17.9952	17.935	18.0205	18.3707	17.7165	17.7388	18.2659	18.339	18.1527	17.7879	17.718
PC(18:2_20:5)	Positive	0.935146	0.00720721	0	17.7993	17.7921	18.7951	18.7343	18.0271	17.9827	17.3599	17.2613	18.2759	18.1626	17.7981	17.634	17.7887	17.7885	17.666	17.5698	18.3264	18.5876	17.8049	17.7047	17.7791	17.5743	17.4674	17.4685	18.5614	18.4557	16.9032	16.9337	17.2583	17.2727	17.8686	17.8487	18.4497	18.2524	17.6308	17.7934	17.9509	17.9864	17.7685	17.719	16.924	16.968	18.9639	19.5328	18.821
PC(P-18:0_18:1)	Positive	0.935146	-0.0090675	0	17.7558	17.7649	18.3378	18.4909	16.6699	16.4981	17.8321	17.6947	18.2098	18.3412	17.844	17.9506	17.8516	17.9134	17.5688	17.2361	18.0666	18.0968	17.6739	17.6432	17.538	17.4404	17.9341	18.2172	17.4641	17.4876	17.9784	17.6619	18.4432	18.5208	17.7683	17.8044	18.9526	18.6317	17.5696	17.9827	16.9511	17.3196	17.9223	17.575	17.3383	17.3752	18.0073	18.5778	17.6532
TG(51:4)	Positive	0.935146	-0.00807855	0	19.7085	19.7166	19.6084	19.5035	19.6807	19.8834	19.6243	19.7988	19.6073	19.8288	20.0719	19.8247	19.2641	19.462	19.9281	20.0728	19.4441	19.4994	20.6273	20.5674	19.7133	19.7681	19.8563	19.6865	20.6091	20.6494	18.8867	18.8223	19.9564	20.0367	18.5235	18.6391	18.5863	18.403	19.9051	19.8923	20.6871	20.9151	20.2971	20.3309	20.1128	20.1705	19.4949	18.6987	18.9071
TG(54:6)_A	Positive	0.935146	-0.0077899	0	22.6226	22.6304	21.6041	21.5915	23.1418	23.0811	22.8922	22.8173	22.6262	22.8438	22.7481	22.5608	22.2811	22.1776	22.4131	22.2813	21.8668	21.9846	22.5372	22.1192	23.1723	23.4178	22.0496	22.0488	22.9121	22.8725	23.1635	23.0741	22.7276	22.9279	22.2801	22.29	22.9137	22.4612	22.557	22.7243	23.0854	23.3238	22.5724	22.4655	22.9823	22.8734	22.0791	22.5181	22.3295
PC(16:0_20:4)_C	Positive	0.941071	-0.00604732	0	25.9908	25.9969	25.7713	25.7087	25.49	25.4515	26.111	26.2695	26.1219	26.3472	25.8991	25.9662	25.7195	25.6761	25.9099	25.6796	25.9001	26.0588	25.4172	25.1941	25.9746	25.9401	26.1385	26.1811	26.1301	25.9944	26.1083	26.0215	26.2746	26.2369	26.2647	26.1354	26.5047	26.4184	25.6952	25.6602	26.4995	26.4733	25.7585	25.8684	26.2667	26.2022	25.5518	26.2004	25.7848
PC(18:0_22:6)_B	Positive	0.944702	-0.008066	0	19.0232	19.0312	18.8903	18.7737	18.443	18.4269	18.6994	19.1139	19.1162	19.4225	19.1047	19.1008	18.905	19.0756	19.0721	18.7043	19.0309	19.4082	19.0928	18.4453	19.1898	19.0828	19.432	19.6692	19.3642	19.3095	19.4735	19.4611	19.1392	19.0638	19.2722	19.0261	19.0783	18.8635	18.7973	18.6667	19.2353	19.2205	18.7922	18.9599	19.0648	19.1224	18.561	18.9075	18.7608
PC(20:3_20:4)	Positive	0.949082	-0.00539939	0	18.0317	18.0371	17.8537	18.1429	17.8186	17.8622	17.8828	17.9323	18.1512	18.0784	17.9932	18.2044	18.4538	18.3551	18.0647	17.9737	18.0839	18.0766	17.5439	17.296	17.7931	17.8285	18.2263	18.1886	18.0287	17.9926	18.0348	17.9384	18.4896	18.7021	18.0112	17.9022	18.319	18.1707	18.8692	19.1208	17.8355	18.0484	17.9947	17.8925	17.9683	18.0098	18.3127	17.8166	17.9583
CE(18:2)	Positive	0.953805	0.00700588	0	22.5719	22.5649	23.0495	22.8291	22.1995	22.1109	22.6686	23.0914	22.6896	23.0155	22.9262	22.7641	22.39	22.4034	22.5568	22.3278	22.6327	23.0911	22.4689	21.9554	22.823	22.7103	22.8674	23.1219	23.1652	23.0459	22.6907	22.6278	22.7137	22.7582	22.7203	22.5634	22.5736	22.5663	22.0185	21.8315	23.1727	22.8377	22.0692	22.2152	22.4763	22.6098	21.8653	22.4155	22.028
PC(0:0_18:1)_B	Positive	0.953805	0.00423457	0	22.4218	22.4175	22.6447	22.8261	22.1009	22.0732	23.3003	23.4037	22.7372	22.9134	22.5357	22.3002	22.6133	22.5546	22.0785	21.9789	22.9156	22.9503	21.8013	21.7253	22.0647	22.249	22.2088	22.1229	22.4777	22.3417	22.9522	22.8247	23.1912	23.1626	22.8302	22.8507	22.2236	22.2896	22.4849	22.6073	22.1846	22.3319	21.4433	21.59	22.51	22.2154	22.7294	22.8688	22.2123
PC(18:0_22:4);PC(20:0_20:4)_A	Positive	0.953805	-0.00421484	0	21.4545	21.4587	20.7454	20.9397	21.6192	21.7299	21.7123	21.7221	21.4957	21.5794	20.8755	20.942	21.091	21.2114	21.4713	21.2463	21.0114	20.9991	21.1887	21.0842	21.7836	21.6255	21.6269	21.7433	20.5759	20.6441	21.8473	21.7785	22.1125	22.3373	21.505	21.4649	21.6741	21.7508	22.1601	22.3032	21.0893	21.175	20.512	20.4946	21.7992	21.7453	21.347	20.7481	20.9869
PC(P-16:0/20:3)	Positive	0.953805	0.00545984	0	18.5241	18.5186	18.6285	18.398	17.2671	17.4554	18.6771	18.7182	18.8421	19.02	18.6188	18.7189	19.2551	19.1942	18.2541	18.2396	18.251	18.5908	18.4762	18.3367	18.6084	18.4549	19.0978	19.1863	19.1851	19.3294	18.285	18.0882	18.8492	18.7561	19.0431	18.996	18.888	18.7448	18.3676	18.5537	18.5662	18.4756	19.0194	18.7684	18.2089	18.1482	17.8701	18.5623	17.7757
TG(53:3)	Positive	0.953805	0.00374533	0	21.213	21.2092	21.0761	20.8541	21.3224	21.2768	21.8493	22.0174	21.1967	21.3721	20.6182	20.5486	21.2811	21.2567	21.6047	21.5155	21.0611	21.2341	21.5711	21.5233	21.2154	21.3811	21.0023	20.9099	21.5765	21.6136	20.995	20.9033	21.8832	21.6612	20.6416	20.6577	19.9809	19.9	21.388	21.3476	21.7975	22.0065	21.4492	21.3584	21.8683	21.6916	20.8398	20.5723	20.845
PC(17:1_18:2)	Positive	0.956504	-0.00310876	0	18.185	18.1881	17.8945	18.0643	17.3053	17.3929	18.6029	18.6175	18.1236	18.0734	18.0746	17.9639	18.4997	18.36	18.2361	18.3007	18.2859	18.3386	18.3583	18.3414	17.8999	17.9807	18.3282	18.4382	18.4511	18.2056	17.3183	17.1587	18.8597	19.0534	18.5048	18.4348	18.1234	18.1428	18.5218	18.8153	18.4288	18.5069	18.6882	18.7034	18.1876	18.1251	18.0252	17.7943	17.2726
SM(d18:1/24:0)	Positive	0.956512	-0.00459846	0	23.8219	23.8265	23.9478	24.0501	23.238	23.2202	23.3346	23.3755	24.142	24.0845	23.6776	23.6332	22.8362	22.8786	24.0237	23.7878	23.7165	23.9837	24.4649	24.2067	23.5213	23.6018	24.0732	24.09	23.739	23.4366	23.8285	23.5833	24.4312	24.5077	23.8482	23.6227	24.4766	24.4435	23.7462	23.7354	23.9523	23.884	23.7856	23.7676	23.796	23.9206	23.3819	24.0962	23.6203
PI(18:0_18:2)	Negative	0.963196	0.00772726	0	19.7432	19.7355	19.995	20.0709	19.6841	19.4531	19.216	18.9633	19.5191	19.5343	19.8466	20.0205	19.6516	19.5106	19.5742	19.829	19.9988	19.631	20.6257	20.3431	19.5837	19.5447	20.5293	20.645	20.1912	20.355	19.1096	19.4135	20.0164	19.8793	19.1043	19.1144	19.9916	19.9768	20.0356	20.1423	20.1291	20.1756	20.3187	20.2715	19.1306	19.427	19.1994	19.173	19.3715
CE(22:6)	Positive	0.96413	-0.00946638	0	19.969	19.9784	20.9224	21.0956	18.6047	18.8287	19.566	19.7444	20.6697	20.8429	20.3511	20.3897	19.689	19.6928	20.115	19.8348	19.7995	20.0703	19.8348	18.9679	19.2351	18.8823	21.2202	21.3166	20.9218	20.7528	20.2699	20.3306	19.6398	19.4783	20.5088	20.1095	20.4882	20.3079	18.1648	17.8297	20.8257	20.3502	20.2128	20.266	19.8493	20.1059	19.0561	21.0415	20.206
PC(16:0_18:3)_A	Positive	0.96413	0.00258772	0	21.0968	21.0942	20.9021	20.9895	21.3145	21.1356	20.4401	20.4659	21.3151	21.1335	21.213	21.1704	20.5877	20.5997	21.4446	21.3986	21.3823	21.531	21.4904	21.2667	21.2487	21.2198	21.4713	21.3888	21.8382	21.8021	20.0464	19.9782	20.8896	21.0499	21.2892	21.2124	21.8798	21.6335	20.7394	20.9005	20.9664	21.0443	21.5746	21.6251	20.8351	20.7318	21.0694	21.479	20.2174
PC(17:0_18:1)_A	Positive	0.96413	-0.00303948	0	19.18	19.183	19.8457	20.0059	18.8545	18.8135	19.697	19.7662	18.6828	18.7498	18.5329	18.4736	19.9052	19.934	19.4249	19.3854	19.6855	19.6724	18.9944	18.5699	19.2476	19.0889	19.458	19.5833	17.9295	18.1039	19.2143	19.0334	19.4144	19.5392	19.6872	19.5672	18.5413	18.584	19.5413	19.3399	18.8485	19.0862	19.3172	19.3797	19.0988	19.3741	19.7222	19.4623	20.0391
PE(18:0_0:0)	Negative	0.965081	0.00766451	0	17.8215	17.8139	17.8295	17.9041	17.9224	17.9156	18.2518	17.857	17.7157	17.6679	17.8423	18.1115	17.7119	18.1378	17.9197	17.7139	18.4388	18.1979	17.9969	17.661	17.8115	18.1153	17.6128	17.6267	18.1986	18.2379	18.3204	18.1908	18.2524	18.2059	17.943	17.9948	17.1918	16.9988	17.9551	17.9934	17.9556	17.9379	17.5847	17.754	17.7209	17.486	17.102	17.5253	17.7729
PE(20:4_0:0)	Negative	0.965081	0.0103097	0	19.1672	19.1569	18.6311	18.5749	18.8986	18.666	19.4277	19.8675	19.1405	18.595	19.3718	19.3682	19.1885	19.1923	18.9215	18.7845	19.3407	19.8683	19.1506	18.8201	19.4302	19.5673	19.4946	19.2058	19.2967	19.5042	19.0199	19.0655	20.0967	20.1476	19.2361	19.2824	18.9266	19.1131	19.2891	19.2235	19.2279	18.9002	18.8319	18.6836	19.3215	19.1936	19.4225	18.8587	18.8181
PC(17:0_20:3)_A	Positive	0.965495	-0.00275159	0	18.6593	18.662	19.0698	19.1179	18.2576	17.9464	18.8974	18.9175	18.5723	18.4848	18.6756	18.7426	19.3524	19.4378	19.141	18.8586	19.1454	19.357	18.6698	18.4099	18.3669	18.3872	19.0887	19.2794	18.0741	18.0011	18.5636	18.5011	18.8389	19.1588	18.8319	18.6511	18.0695	17.921	19.2094	19.4736	18.6049	18.635	19.2534	19.2365	18.6605	18.8127	18.3807	18.3621	18.9064
PC(0:0_16:0)_B	Positive	0.967758	-0.00280387	0	24.3267	24.3295	24.2336	24.4397	24.2106	24.2367	24.8224	24.7909	24.3508	24.8094	24.4542	24.3224	24.3954	24.3279	24.3998	24.0467	24.4138	24.5941	24.2497	23.9121	24.201	24.2004	24.3093	24.2218	24.8066	24.8313	24.7696	24.5375	24.5536	24.7433	24.3453	24.3571	24.2036	24.2594	24.2815	24.462	24.4655	24.443	23.8458	23.7494	24.1736	24.1696	23.9977	24.3419	24.0378
PC(14:0_22:6)	Positive	0.967758	0.00265109	0	17.9877	17.9851	18.1319	18.3641	18.309	18.0976	17.1994	16.6274	18.1352	17.9347	17.9184	18.0659	18.0593	18.031	18.594	18.6729	17.7014	17.8421	18.041	17.985	17.2084	16.9536	17.7298	17.979	17.7631	17.7676	18.06	18.0358	17.2056	17.4645	17.8396	17.8278	18.9589	18.8284	17.7467	17.9388	16.8299	16.7793	19.7889	19.2781	17.4216	17.6978	18.1479	18.4246	19.4029
PC(17:0_18:2)_B	Positive	0.967758	0.00122675	0	21.8626	21.8614	22.069	22.0383	21.3524	21.3001	22.2316	22.2452	21.7766	21.734	21.9435	21.8849	21.7145	21.6803	22.1787	22.1361	22.1962	22.3134	22.2868	22.1207	21.6732	21.6316	22.358	22.4761	22.2926	22.1761	21.4151	21.4406	22.4638	22.6036	21.6561	21.5632	21.5653	21.3911	21.6183	21.6758	22.2057	22.2911	22.2412	22.2197	21.7788	21.8393	21.2826	21.5365	20.8961
TG(51:3)	Positive	0.967758	0.00323302	0	21.3508	21.3476	21.4008	21.4293	21.5407	21.5531	21.4273	21.6099	21.1389	21.4656	21.0665	20.6846	21.2383	21.3883	21.7789	21.8623	20.8749	20.9379	21.8384	21.763	21.4026	21.3947	21.5634	21.4655	21.6594	21.6785	20.8828	20.9015	21.3599	21.3192	20.4981	20.6709	20.6278	20.4534	21.501	21.5295	21.7854	21.8579	21.8335	21.6987	21.7835	21.8688	21.336	20.4455	20.7468
TG(52:3)	Positive	0.967758	-0.00278542	0	25.0552	25.058	25.1267	24.8798	24.6177	24.5975	25.2564	25.4627	25.1564	25.3944	25.0323	24.997	24.784	24.8917	25.1141	25.0078	24.6262	25.043	25.2606	24.6002	25.3989	25.2841	25.4476	25.3942	25.7182	25.5757	25.1711	25.2638	25.1906	25.0712	24.9164	24.9496	24.9559	24.7747	24.671	24.5604	25.4457	25.3986	24.959	24.9744	25.2585	25.3434	24.446	24.8924	24.63
PE(P-18:0_20:3)	Negative	0.97365	0.00600657	0	18.7866	18.7806	18.8641	18.9604	17.7814	17.766	18.764	19.0945	19.0948	19.1323	19.0035	18.9654	19.794	19.8608	18.5947	18.291	18.9467	19.124	18.7548	18.4651	18.7109	18.8516	19.0617	18.5943	18.4098	18.5769	18.3066	18.3463	18.59	18.5519	19.5768	19.5068	18.9362	18.8707	18.7681	18.8131	18.2194	17.9993	19.181	19.3337	19.3495	19.1003	18.0862	18.4941	19.0929
PE(P-18:0_20:4)_A	Negative	0.97365	-0.00429547	0	17.5037	17.508	17.6378	17.4609	16.4966	16.254	17.2169	17.5023	17.8432	17.9005	17.2898	17.4144	17.7694	17.928	16.7988	16.8008	17.4837	17.53	17.0421	16.661	17.836	17.681	18.0074	18.2457	17.6776	17.4514	17.5075	17.5202	17.4907	17.4017	18.3902	18.4361	17.9002	17.8734	16.9818	17.0554	18.1985	18.0316	17.8705	17.8854	17.2318	17.1869	17.2189	17.7366	17.3954
PI(18:0_20:4)	Negative	0.97365	-0.00602995	0	21.4693	21.4753	21.8289	21.8116	21.3642	21.3079	21.221	21.0564	21.2727	21.2795	21.1041	21.2581	21.3333	21.4698	21.2027	21.3185	21.9372	21.4935	21.3173	20.8726	21.389	21.0134	21.7853	22.1385	21.6544	21.7654	21.3072	21.5827	21.5759	21.5039	21.327	21.3289	21.1978	21.171	21.3986	21.5824	21.8663	21.9268	22.0113	21.8637	21.3528	21.4875	21.122	21.3645	21.8872
PI(18:1_20:4)_A	Negative	0.97365	-0.00527069	0	16.523	16.5282	16.8876	17.0058	16.4817	16.4753	16.3651	16.5548	16.226	16.3241	16.5612	16.5717	16.4298	16.6221	15.995	16.262	17.0526	17.1679	16.4566	16.2974	16.4109	16.3951	17.2939	17.2045	16.2422	16.2147	16.6029	16.7842	16.7869	16.7609	16.3488	16.5537	16.5631	16.4401	17.2361	17.2438	16.514	16.6676	16.6017	16.6444	15.9627	15.8171	16.6905	15.8323	16.303
PE(P-18:0/18:1)	Negative	0.979294	0.00306398	0	19.7512	19.7481	20.0024	19.9704	18.9434	18.8979	20.0099	20.0597	19.9804	20.0337	19.6725	19.8045	20.4473	20.6625	19.3233	19.2745	19.7899	19.85	19.3199	19.2907	19.9899	19.9838	19.9232	19.9304	19.4849	19.3452	19.4224	19.3148	20.1076	19.8754	20.2938	20.2815	19.9961	20.0129	19.4651	19.4039	19.4613	19.4305	19.7022	19.5662	19.9363	19.5783	19.4075	19.9863	20.0044
PI(16:0_20:3)	Negative	0.979294	0.00498375	0	15.9586	15.9536	15.7792	16.037	15.9668	15.9498	15.4567	15.3375	15.1502	15.1623	15.8597	15.7602	15.8996	15.8112	15.8539	16.3973	16.5709	16.464	16.6423	16.6099	16.0663	15.9252	16.2363	16.0577	15.3981	15.7463	16.3298	16.3263	16.1641	15.8561	15.7274	15.6889	15.8356	15.854	17.0096	17.0078	15.4198	15.449	16.4506	16.5299	15.3293	15.5124	16.0783	14.9977	15.8624
PC(16:0_18:2)_A	Positive	0.98246	-0.000943003	0	26.5332	26.5342	26.5355	26.4032	25.9397	26.0181	26.4114	26.6866	26.6976	26.6762	26.5034	26.5378	26.1433	26.2113	26.6381	26.4825	26.5443	26.7863	26.7295	26.3749	26.6113	26.4725	26.8037	26.9397	27.0566	26.9166	26.4571	26.3869	26.7651	26.7981	26.6186	26.3959	26.9276	26.8241	26.3156	26.3894	26.9276	26.9222	26.3603	26.4491	26.5146	26.4523	26.1375	26.4923	25.9306
PC(16:0_22:4)	Positive	0.98246	-0.00101879	0	21.9321	21.9331	21.2287	21.4283	21.9878	22.0132	22.2439	22.2748	21.7093	21.6752	21.6066	21.6349	21.726	21.8494	21.9011	21.6833	21.6903	21.8385	21.5353	21.3408	22.3463	22.2705	22.1692	22.1659	21.1236	21.0185	22.2935	22.2175	22.6149	22.7684	21.9336	21.9481	22.2541	22.1383	22.5464	22.6749	21.6708	21.8109	21.2739	21.2821	22.3042	22.3614	21.7001	21.2826	21.378
PC(O-16:0/20:3)	Positive	0.98246	-0.000879022	0	19.0567	19.0576	19.4334	19.3178	18.2173	18.2555	19.1658	19.3176	19.6157	19.6178	19.0324	19.1951	19.9029	19.9162	18.8237	18.6199	18.9327	18.9474	19.0175	18.9088	18.6875	18.8977	19.283	19.3419	20.2423	20.0609	19.0435	18.9022	19.4629	19.5791	19.9269	19.7938	19.4333	19.5516	19.4706	19.4935	18.8471	18.5745	18.5138	18.4683	18.4361	18.4885	18.3517	18.8812	18.5026
CE(20:4)	Positive	0.98282	-0.00297579	0	20.1514	20.1544	20.6876	20.5157	18.314	18.303	19.978	20.5279	20.5349	21.221	21.4399	21.4058	20.0213	19.8076	19.4644	19.0397	20.257	20.8039	19.4071	18.1096	20.457	20.0697	21.1422	21.493	21.0259	20.6185	20.4597	20.3119	20.4679	20.3137	21.1883	20.8463	20.9756	20.8637	18.3943	18.2149	21.3454	20.7271	19.7967	20.2505	19.7461	20.0006	18.3812	20.9028	19.4415
Cer(d18:0/24:0)	Negative	0.983079	0.00363722	0	16.8566	16.853	16.7572	16.8766	17.1293	16.8826	15.1717	15.2393	16.4803	16.8167	16.492	16.1249	15.3006	15.0215	17.1715	16.9584	16.5831	16.8706	17.233	17.1174	17.671	17.6716	17.3246	17.2575	16.4117	16.3836	16.0592	15.995	16.6277	16.6387	16.7416	16.3621	17.6925	17.6764	16.4997	16.4519	17.2534	17.239	16.8421	16.7651	17.5274	17.3342	16.9094	17.98	17.0597
PE(20:3_0:0)	Negative	0.98597	0.00146352	0	15.86	15.8585	15.2345	15.1643	15.9526	15.5363	15.9065	16.2103	16.0088	15.6476	16.1778	16.1652	16.5467	16.3383	15.5906	15.9336	16.452	16.6047	15.6489	15.9564	15.9947	16.1149	15.4262	15.5311	14.9528	15.7227	16.4326	16.3366	16.3717	16.7597	15.9388	16.0808	14.8484	15.5313	16.7257	16.3495	15.5418	15.4269	15.7412	15.6894	16.0684	15.3195	16.0833	15.5065	15.687
PE(O-16:0/20:4)	Negative	0.98597	-0.000817444	0	19.3102	19.311	19.0608	19.0143	18.2757	18.2234	19.8898	20.0148	19.6486	19.6359	19.7467	19.9955	19.9891	19.9312	18.2587	18.2157	19.5295	19.4805	19.3084	19.1587	18.9632	19	19.3575	19.3709	20.211	20.065	19.1846	18.9149	19.3862	19.4216	20.0337	20.1866	19.6351	19.7378	19.3173	19.5005	19.24	19.2703	19.3382	19.2726	19.1136	18.8414	18.5312	19.3765	19.2976
PI(18:1_18:2)	Negative	0.98597	0.00182565	0	16.1578	16.156	16.0877	16.4517	16.1642	16.2454	16.0606	16.3071	16.2497	16.3296	16.7734	16.6246	15.9112	15.6549	15.3759	15.6739	17.4061	17.3008	16.6838	16.6811	16.1874	16.0099	17.0302	16.7827	16.4024	16.7679	15.5108	15.8142	16.9074	16.7927	15.9596	15.9038	15.8866	15.6639	17.1523	17.0007	16.6629	16.7271	16.2717	16.591	15.8714	15.7446	16.4466	15.5206	15.0948
[truncated: 7 more columns]

## Sheet: TableS3
		p cutoff 0.005					Patient 1		Patient 2		Patient 3		Patient 4		Patient 5		Patient 6		Patient 7		Patient 8		Patient 9		Patient 10		Patient 11		Patient 12		Patient 13		Patient 14		Patient 15		Patient 16		Patient 17		Patient 18		Patient 19		Patient 20
Lipid	Ionization Mode	p_adjust	Log2FC(Before/After)	Flag	Avg. Before	Avg. After	1_Before_51	1_After_52	2_Before_53	2_After_54	3_Before_55	3_After_56	4_Before_57	4_After_58	5_Before_59	5_After_60	6_Before_61	6_After_62	7_Before_63	7_After_64	8_Before_65	8_After_66	9_Before_67	9_After_68	10_Before_69	10_After_70	11_Before_71	11_After_72	12_Before_73	12_After_74	13_Before_75	13_After_76	14_Before_77	14_After_78	15_Before_79	15_After_80	16_Before_81	16_After_82	17_Before_83	17_After_84	18_Before_85	18_After_86	19_Before_87	19_After_88	20_Before_89	20_After_90
PE(16:0_20:4)	Negative	2.36e-05	-0.40576	-1	19.6553	20.0611	20.2225	20.4623	19.597	19.9175	19.4299	20.1676	19.6383	19.7596	20.5481	20.6832	19.8007	20.051	19.3319	19.6875	19.9219	20.6338	19.5696	20.0968	19.7878	19.9699	19.2403	19.8661	18.824	19.7044	19.2371	19.7639	19.7909	20.3145	19.5705	19.7068	19.1627	20.0714	20.7805	20.9956	19.8081	20.1318	19.31	19.6662	19.5343	19.5716
PE(16:0_20:5)	Negative	2.36e-05	-0.46097	-1	15.0222	15.4832	14.9104	15.4698	14.9589	15.3815	14.5284	15.1273	16.8558	16.999	15.4783	15.7205	14.6791	15.1694	17.3404	17.6857	15.3217	16.0904	15.1648	15.4475	14.3576	14.419	16.1102	16.564	13.2063	14.0444	16.2531	16.6975	14.4203	15.2316	13.6788	13.9933	14.5313	15.7066	15.6213	16.0409	15.3263	15.4538	13.7535	14.2265	13.9484	14.1954
PE(16:0_22:5)_A;PE(18:1_20:4)	Negative	0.00019758	-0.32222	-1	18.3612	18.6834	19.6615	19.8373	18.5315	18.5997	18.0053	18.6257	18.0209	18.1054	19.1714	19.0804	18.5206	19.1084	18.4256	18.3831	18.5741	19.3549	18.6062	18.8396	19.2488	19.4849	17.6196	18.2048	17.9819	18.7227	17.5369	17.78	17.7291	18.3496	18.0238	18.1894	18.0232	18.7505	18.898	19.0613	18.6945	18.7652	18.0907	18.4403	17.8596	17.9839
PE(16:0_22:6)	Negative	0.00019758	-0.46733	-1	20.0035	20.4709	20.2078	20.3865	20.6291	20.9265	19.555	20.3541	20.749	20.9257	20.7911	20.7575	19.4762	20.0615	21.047	21.2031	20.4477	21.143	19.8295	20.4556	19.8783	19.8092	20.6336	20.8741	18.4694	19.7926	20.0566	20.8817	19.6287	20.5785	19.2753	19.8609	19.5354	20.7124	20.9569	21.1618	20.3524	20.2344	19.604	20.1203	18.9473	19.1776
PE(18:1_22:6)	Negative	0.000243527	-0.43428	-1	17.0165	17.4508	17.7364	17.9313	17.7819	18.3204	15.863	16.7778	17.4904	17.702	17.8156	18.0625	17.0163	17.5515	17.9559	17.8884	17.9373	18.2739	17.5002	17.628	18.0486	18.1946	16.6888	17.4694	15.5447	16.6028	17.391	17.3831	16.6058	16.8832	15.1465	15.836	16.4947	17.723	17.7141	18.1297	17.1872	17.0497	16.7163	17.2487	15.6955	16.3596
PE(18:2_0:0)_A	Negative	2.36e-05	-0.8247	-1	16.0182	16.8429	16.1578	16.6079	16.0586	16.8487	16.3659	17.5617	15.575	16.0277	15.0241	16.9086	16.5512	17.3763	16.1906	16.6492	15.2996	15.8464	16.0066	16.8746	15.3371	15.7926	15.1898	16.0139	17.4089	18.0579	16.3058	16.585	15.8234	16.2669	16.6103	17.2556	16.3083	16.7263	14.6815	16.5127	16.4283	17.5327	17.1468	18.0502	15.895	17.3635
PE(18:2_0:0)_B	Negative	5.29e-05	-0.52729	-1	17.8274	18.3547	18.0217	17.9393	17.9745	18.3878	18.3404	18.405	17.2271	17.486	16.571	18.1425	17.9924	18.5551	17.8596	18.1234	17.1373	18.4163	18.0427	18.3821	16.8926	17.5825	17.0775	17.8874	18.7497	19.1915	17.7771	18.2487	17.4741	17.6886	18.2787	18.7763	18.0949	18.5674	17.8754	17.9709	18.0387	18.8682	18.3422	19.5127	18.7812	18.9626
PE(20:3_0:0)	Negative	4.03e-05	-0.86447	-1	15.4195	16.284	16.0516	16.6148	14.9094	15.9625	16.3049	16.7738	14.949	15.7852	14.8783	16.4349	15.9508	16.811	15.2851	16.2151	15.749	16.0845	15.2416	16.7313	15.2196	16.2584	14.9593	16.3703	15.7803	16.0186	14.4759	15.2661	15.0496	14.941	15.6759	17.0616	15.9968	16.4225	15.1604	16.2088	15.9474	17.0191	15.0741	15.8333	15.731	16.8667
PE(20:4_0:0)	Negative	2.36e-05	-0.82075	-1	18.4835	19.3043	19.0955	19.502	17.3302	19.1083	19.3892	20.0977	18.3171	18.864	17.9629	19.3716	18.5906	19.143	18.464	18.9488	18.2551	18.9303	18.5008	19.6472	18.902	19.3709	18.0025	19.3251	19.8128	20.0082	18.4527	18.944	17.9841	18.7914	18.0544	19.029	19.4052	20.0067	17.8511	18.6863	18.8539	19.5388	18.6892	19.8783	17.7574	18.8941
PE(20:5_0:0)	Negative	2.36e-05	-1.03271	-1	13.7296	14.7623	13.0776	13.5553	12.8457	14.2406	13.5793	14.5942	14.6521	15.706	12.0988	14.3326	12.8216	14.7467	16.1399	16.7614	13.9169	15.1036	13.7968	15.7025	13.1508	13.7687	15.3273	15.9914	14.2243	14.527	15.6368	15.99	13.1806	13.7016	11.8633	13.8297	15.4255	15.8639	13.405	13.6261	13.7129	15.3751	12.2614	13.6771	13.4751	14.1524
PE(22:6_0:0)	Negative	2.36e-05	-1.10277	-1	17.5751	18.6779	17.4852	18.3219	17.7263	18.9781	18.2968	19.353	18.1464	18.8757	16.7757	18.6855	16.7598	17.8734	18.9269	19.2375	17.3851	19.1626	17.7812	18.7302	17.4176	18.1554	18.1219	19.4407	18.1528	18.6357	17.453	18.7021	16.7766	17.78	17.2317	18.1124	18.8015	19.3174	17.2752	18.6376	17.4321	18.9934	17.4227	18.6922	16.1337	17.8723
Cer(d18:0_24:0)-	Negative	0.012844	0.21401	0	16.257	16.043	15.5281	15.8149	16.296	16.439	16.5907	16.7701	16.7491	16.6822	17.1334	17.1353	14.6047	13.9577	17.2599	17.1904	17.0085	16.5002	16.281	15.6764	15.7397	15.6166	16.2956	16.2241	16.5629	16.1868	16.6917	15.7213	16.958	16.6296	16.1367	15.9872	15.8394	15.5926	16.1325	15.9498	15.9215	15.4643	15.2587	15.2439	16.1524	16.078
Cer(d18:1_16:0)	Negative	0.37567	0.05791	0	17.0924	17.0345	17.3631	17.2651	16.5315	16.6942	17.1741	16.9984	16.6052	16.8123	17.0578	16.9492	16.9933	17.0484	17.1452	16.7432	17.3081	17.5376	17.0014	16.6657	16.8503	16.5724	16.9077	16.486	17.552	17.2836	17.6385	17.8302	17.2615	17.5438	17.134	17.3005	17.1042	16.9981	17.0023	16.6993	16.9118	16.9555	17.1406	17.1732	17.1664	17.1343
Cer(d18:1_22:0)	Negative	0.13828	0.08294	0	18.5332	18.4503	18.2743	18.1892	18.3488	18.2516	18.7392	18.6808	18.3599	18.2384	19.0636	19.1463	18.1381	18.2758	19.1673	18.6459	18.4094	18.2244	18.4751	18.2289	18.0704	18.1391	18.5412	18.5232	19.1113	18.8251	19.2611	18.8777	18.7907	18.8988	18.3002	18.4881	18.136	18.0492	18.0669	17.9324	18.3718	18.372	18.2364	18.3392	18.8031	18.6798
Cer(d18:1_23:0)	Negative	0.104789	0.13092	0	18.6969	18.566	18.9013	18.6385	18.815	18.1873	18.891	19.055	18.4415	18.491	19.1368	19.2374	18.2095	18.166	19.5358	19.0667	18.9185	18.6808	18.6062	18.204	18.369	18.396	18.6512	18.8466	19.2689	18.7984	19.018	18.8443	18.5987	18.9497	18.5751	18.8241	18.1345	17.9354	17.9169	17.7531	18.7204	18.2393	18.3554	18.3824	18.875	18.6242
Cer(d18:1_24:0)-	Negative	0.0232643	0.13326	0	20.1229	19.9896	20.0896	20.0125	20.0663	19.9789	20.2155	20.1962	19.9018	19.921	20.6124	20.6875	19.5819	19.4768	21.008	20.6723	20.3343	20.116	20.2232	19.7223	19.7564	19.8697	20.0007	20.4169	20.8323	20.2735	20.434	20.1342	20.3356	20.3027	20.0629	19.9254	19.2112	19.2545	19.4865	19.3398	20.2163	19.622	19.8742	19.764	20.2143	20.1064
Cer(d18:1_24:1)	Negative	0.0174153	0.16455	0	18.7218	18.5573	19.003	18.9337	18.6031	18.3561	18.6286	18.4757	18.9945	18.8829	18.9766	18.7898	18.532	18.48	19.3686	18.8209	19.4944	19.649	18.5195	18.4486	18.5554	18.2569	18.9379	18.7329	19.1287	18.7881	19.3415	18.9542	18.7212	18.8264	18.5023	18.5635	18.1416	17.998	18.263	17.7509	17.944	17.4125	18.306	18.0065	18.4746	19.0188
Cer(d18:1_25:0)	Negative	0.385253	-0.08167	0	17.1323	17.214	17.4386	17.1893	16.9604	16.8932	16.4716	17.0336	16.3132	16.8879	17.9987	17.9951	15.2993	15.9307	17.8257	17.4831	17.1661	17.2433	17.3585	17.7634	17.3052	17.5041	17.9972	18.17	18.3267	17.9048	17.3921	17.1596	17.1696	17.2973	17.2223	17.7533	17.0978	16.7444	16.0015	15.7018	16.5399	16.6493	16.9804	17.0649	17.7814	17.9108
GalCer(d18:1_22:0)	Negative	0.159176	0.09966	0	18.378	18.2783	18.5862	18.6103	18.0191	17.9092	18.7015	18.5268	18.7722	18.8561	18.2408	18.0511	18.0823	18.1493	18.6097	18.1216	18.1088	17.8447	18.7116	18.2334	17.9358	18.0635	18.6027	18.5704	18.9389	18.7778	18.5615	18.6998	19.054	19.0826	18.6642	18.2496	18.2421	17.9383	18.109	17.7754	16.7411	16.9133	18.2049	18.3981	18.6729	18.795
GalCer(d18:1_23:0)	Negative	0.13828	0.12687	0	17.3356	17.2087	17.8453	17.7571	17.2112	16.7859	17.6946	17.7441	17.6217	17.8278	17.4383	17.1246	16.7448	16.8775	17.5844	17.1594	17.2585	17.1079	17.5775	16.7036	16.7192	16.9691	17.7272	17.8401	17.99	17.766	17.8321	17.739	18.1933	18.0932	17.5753	17.4258	17.2014	16.9902	16.7014	16.2058	15.5667	15.6342	16.5548	16.7721	17.6736	17.6505
GalCer(d18:1_24:0)	Negative	0.042968	0.14617	0	18.2632	18.117	18.7474	18.4915	17.9909	17.6521	18.6669	18.5857	18.947	18.7798	18.1957	18.2078	17.8684	17.7331	18.6575	18.1738	18.0804	18.0954	18.5063	17.9924	18.0036	18.0394	18.5667	18.8801	18.9348	18.4644	18.6218	18.5263	19.1499	19.1264	18.1806	17.986	17.9868	17.6138	17.8689	17.3687	16.4335	16.2323	17.6509	17.6851	18.2064	18.7067
GalCer(d18:1_24:1)	Negative	0.893643	-0.01437	0	17.3675	17.3819	18.2426	18.1548	16.7967	17.1431	17.7725	17.6011	18.0464	18.0245	16.2433	16.7415	16.8285	17.0739	17.3845	17.12	18.2774	18.2215	17.4134	17.037	17.6878	17.5311	17.9008	17.7953	17.8772	17.6514	17.8119	17.9125	18.225	17.9567	16.9618	16.8696	17.5856	17.764	17.3261	17.2262	15.0477	15.4726	16.8751	17.0482	17.0457	17.2924
PE(16:0_0:0)	Negative	0.19584	-0.0731	0	16.9874	17.0605	16.9933	17.12	16.5253	16.6683	18.0716	18.2076	16.9307	16.7958	16.5985	16.7929	17.0938	17.1067	17.3864	17.5747	16.5643	16.5763	17.0927	17.421	17.0201	16.6051	17.1754	17.3636	17.2597	17.2463	16.5239	16.3382	16.6838	16.9436	17.0557	16.8872	17.6609	17.287	16.8768	17.2258	16.5223	16.9422	17.0066	17.3355	16.7053	16.7713
PE(16:0_18:0)	Negative	0.012844	0.18011	0	17.7638	17.5837	17.6998	17.6832	17.4883	17.3234	17.9596	17.7588	17.5809	17.1093	17.1484	17.2733	16.9442	17.1661	18.1867	17.6984	18.5982	18.5356	17.5872	17.3019	16.9994	16.7555	17.5204	17.2252	18.0119	18.036	17.8296	17.9238	18.0259	17.8907	18.2182	17.6029	18.0892	18.0284	17.9736	17.2708	17.5002	17.336	17.9278	18.0535	17.9867	17.7017
PE(16:0_18:1)	Negative	0.910626	-0.02224	0	18.4058	18.428	19.1136	19.1645	18.9264	18.7402	18.0951	18.3684	18.1451	18.0916	19.5458	19.3682	17.1319	17.4906	18.4889	18.3011	18.92	19.4585	19.0204	18.814	18.3643	18.2124	18.028	17.9542	17.636	17.9869	17.6181	17.7936	18.1543	18.2385	18.3759	18.1843	17.2897	18.1145	19.7181	19.5729	18.7353	18.672	18.264	18.0035	18.5439	18.0299
PE(16:0_18:2)	Negative	0.165397	-0.16799	0	19.2001	19.3681	19.2758	19.43	19.4689	19.5867	18.6995	19.0933	18.7224	18.6159	20.2816	20.0992	19.1702	19.3353	19.0385	19.3	19.2639	20.3271	19.1313	18.8008	18.2557	18.3157	18.5095	18.5586	18.6872	19.5379	18.9339	19.1793	19.1134	19.6396	19.8084	19.849	18.2681	18.9949	20.1347	20.2026	19.633	19.556	19.8616	19.6201	19.7454	19.3208
PE(18:0_0:0)	Negative	0.19584	-0.1249	0	16.9011	17.026	17.1088	17.1576	16.5521	16.4601	17.7812	17.587	16.4685	16.6334	16.6703	16.5138	17.5351	17.4353	17.0423	16.9335	16.3193	16.5402	17.1686	17.1658	16.4219	16.7146	16.8396	16.9674	16.837	16.9012	16.3641	16.6294	16.2299	17.004	17.1822	17.317	17.494	17.2919	16.744	17.249	16.6367	17.4457	17.278	17.4031	17.3479	17.1696
PE(18:0_18:1)	Negative	0.00612196	0.33099	0	19.2556	18.9246	19.5561	19.3969	20.1665	19.5933	18.4452	18.6334	18.9849	18.4919	20.4594	20.0582	18.8492	18.942	19.3859	18.9538	19.1641	19.4072	20.5282	19.427	18.6025	18.4141	18.9156	18.6317	19.052	19.1135	19.0979	18.6875	18.6393	18.5866	19.1748	18.4904	17.915	18.0299	19.8331	19.7227	19.3611	18.9311	19.6322	18.7432	19.3482	18.2368
PE(18:0_18:2)	Negative	0.258298	0.09635	0	20.7296	20.6333	20.7759	20.7384	20.9261	20.856	20.0527	20.1848	20.2696	19.8076	21.5842	21.566	21.0093	21.1309	21.016	20.4902	20.5625	21.2808	21.1259	20.3278	19.6487	19.453	20.2117	20.0934	20.8171	20.867	20.3388	20.5011	20.5383	20.7333	21.1548	21.1189	19.8718	20.1414	21.3396	21.1163	20.8295	20.5441	21.2214	20.8357	21.2985	20.879
PE(18:0_20:3)	Negative	0.385253	-0.05776	0	18.3972	18.455	19.1414	19.133	18.7217	18.3692	17.6461	18.1065	17.9891	17.8632	19.6182	19.5126	18.8038	19.2258	18.9248	18.6039	19.0499	19.4351	18.8386	18.6617	18.0065	18.1693	18.1576	18.7198	17.5709	17.9332	17.1808	17.3086	18.0493	18.2782	18.3261	18.4895	17.4561	17.8715	19.1977	19.2014	18.8121	18.7433	17.543	17.2003	18.911	18.2738
PE(18:0_20:4)	Negative	0.316744	-0.09067	0	21.2849	21.3756	21.8599	21.9608	21.2462	21.2416	21.0041	21.432	20.8397	20.9505	22.1619	22.081	21.2592	21.6347	21.3152	21.06	21.2653	22.0471	21.6556	21.3269	21.2491	21.3205	20.9599	21.268	21.0896	21.3089	20.5833	20.8147	21.0697	21.3185	21.4637	21.3459	20.9048	21.4142	22.0563	21.6539	21.2705	21.3689	21.1945	21.2503	21.2496	20.713
PE(18:0_20:5)_B;PE(18:0_20:5)	Negative	0.0979794	-0.19241	0	17.4096	17.6021	17.2495	17.2328	17.0941	17.2075	16.9818	17.4237	18.3693	18.3184	18.0338	17.9122	17.4437	17.9764	19.3325	19.2414	17.4474	17.9791	17.5875	17.687	17.301	17.1519	18.2057	18.4496	15.3467	16.2928	18.0788	17.9811	16.8915	17.4036	16.9185	17.2864	16.7979	17.5959	18.1986	18.3149	17.5597	17.5097	16.3625	16.3766	16.9923	16.7
PE(18:0_22:5)	Negative	0.206729	-0.11687	0	16.4087	16.5256	16.8627	16.8754	16.8832	16.5073	17.1226	17.6753	16.1649	16.2119	18.0282	17.9196	17.0502	17.4738	15.7172	15.3058	15.8699	16.4602	16.2385	16.1533	16.6282	16.7817	15.8168	16.3343	15.1955	15.3767	15.2156	15.6552	16.3758	16.7477	17.0428	17.2873	15.5926	16.2458	18.0364	18.0391	16.4144	16.2945	15.2839	14.9838	16.6348	16.1827
PE(18:0_22:6)	Negative	0.0466414	-0.215	0	19.2818	19.4968	19.1807	19.2874	20.0965	20.1119	18.7274	19.2403	20.0959	19.9425	20.2802	20.1851	18.8522	19.1068	20.5919	20.5057	19.4784	20.261	19.2995	19.6178	18.7959	18.7478	20.3538	20.5328	17.6619	18.4094	19.1794	19.5149	18.8364	19.4177	18.526	18.9486	18.808	19.6772	20.2966	20.4814	19.4498	19.1211	18.7813	18.7599	18.3444	18.0667
PE(18:1_0:0)	Negative	0.19584	-0.22824	0	18.1202	18.3485	18.6407	18.6742	18.0634	17.9553	18.8855	19.0971	16.9857	18.4388	16.9934	17.5867	17.7718	17.6963	17.9548	17.2806	17.4485	17.7306	18.2961	19.1108	18.474	18.7918	18.6818	18.9242	18.8159	19.0912	17.2645	17.4298	17.2218	16.8153	18.0237	18.897	19.2927	18.6845	17.5479	18.9906	18.1684	18.4769	18.6081	18.489	19.2661	18.8089
PE(18:1_18:1)	Negative	0.00612196	0.33893	0	17.3859	17.047	18.5386	18.5728	18.6813	18.1667	16.2392	16.4485	16.6593	16.2049	17.8409	17.3279	17.19	17.0105	17.0181	16.7077	17.4189	17.6944	19.2425	18.1272	17.2868	17.061	16.4215	15.8161	17.5165	17.5288	17.6432	16.7554	16.6453	16.2412	16.9484	16.3574	15.9066	16.3043	17.6933	17.5007	17.2828	17.0649	18.2304	17.4483	17.3149	16.6009
PE(18:1_18:2)	Negative	0.271128	0.1111	0	17.9961	17.885	18.7594	18.7288	18.8608	18.6285	16.7985	17.0346	17.1398	16.7803	18.2662	18.015	19.0746	18.9935	17.2335	17.2583	18.0728	18.5721	18.7472	18.0177	17.5958	17.5657	16.5559	16.0687	18.3309	18.7289	17.9025	17.3098	17.4025	17.626	17.9864	17.9482	16.6962	17.3021	18.0905	18.2485	18.541	18.0098	19.4819	18.6923	18.3864	18.1718
PE(40:4)	Negative	0.0591422	0.10918	0	19.2728	19.1636	19.0303	19.2218	18.9494	18.7879	19.6397	19.4617	18.7203	18.2377	18.8924	18.9947	19.0845	19.3381	18.7736	18.3821	19.1617	19.2226	19.6881	19.5119	19.4798	19.3449	19.2693	19.3473	19.5268	19.3154	19.0387	18.8899	19.3608	19.3909	19.3059	19.2506	20.2945	20.1012	19.7092	19.2381	19.1735	19.0597	19.2213	19.1987	19.1359	18.9769
PE(O-16:0_22:6)	Negative	0.0561167	0.09947	0	16.9724	16.873	16.285	16.223	17.1545	16.838	16.9041	16.618	17.5795	17.4468	16.6592	16.6483	16.1383	15.9375	17.4921	17.5205	17.0676	17.1036	16.7421	16.856	16.6859	16.2347	18.0075	17.9349	16.5976	16.7474	17.9313	17.918	16.7187	16.5404	16.2956	16.4168	17.6807	17.6741	17.0743	16.9491	16.8869	16.6632	17.0329	17.055	16.5151	16.1344
PE(O-18:0_20:4)	Negative	0.0915001	0.13106	0	16.894	16.7629	16.7401	16.7383	16.2986	16.2347	16.6096	16.2366	16.5091	16.1388	16.2233	15.9249	17.1008	17.2128	15.685	15.6041	16.4518	16.5728	16.7439	16.9517	17.1679	16.6658	17.1219	16.7208	17.0639	17.1556	17.3634	17.3703	17.6414	17.5082	16.8742	16.9282	17.7128	17.544	17.5871	17.0457	16.8733	16.8062	16.7923	16.9415	17.3197	16.9579
PE(O-38:4)	Negative	0.042968	0.12307	0	18.9162	18.7931	18.9276	19.0587	18.7987	18.5097	18.8864	18.7894	18.5857	18.3893	19.0037	18.8675	18.5821	18.7668	18.4471	18.4181	18.3189	18.5518	18.8685	18.3874	19.1709	19.1535	19.2272	19.4585	19.4037	18.9202	19.5845	19.4112	18.9315	18.8686	18.8012	18.7218	19.418	19.1025	19.3238	19.0329	18.8154	18.598	18.6121	18.5721	18.6163	18.2839
PE(P-16:0_18:2)	Negative	0.0174153	0.1778	0	18.9543	18.7765	17.9884	17.7601	18.5028	18.5829	17.9506	17.7716	18.5196	18.1671	18.0817	17.9208	19.1179	19.0496	18.0542	18.1449	17.9176	17.7888	17.925	18.4556	19.3748	18.4543	19.3032	18.5248	18.9801	18.9913	20.2956	20.287	19.0774	19.0177	19.1872	19.169	19.4687	19.1596	19.8638	19.5433	20.086	19.768	20.0362	19.9732	19.3552	19.0006
PE(P-16:0_20:3)	Negative	0.00771934	0.17169	0	18.4334	18.2617	17.9484	17.9208	17.9356	17.8504	17.9267	17.514	18.524	18.1579	17.4864	17.3819	19.1667	18.9628	17.8851	17.802	17.2842	17.3367	17.7499	17.8788	18.4422	17.9707	18.239	17.5751	18.5649	18.4486	19.521	19.3176	18.7138	18.5521	18.3532	18.5688	18.6698	18.7102	18.9904	18.7126	19.481	19.2261	19.2145	19.1637	18.5704	18.1826
PE(P-16:0_22:4)	Negative	0.0050475	0.16848	0	17.8131	17.6446	17.604	17.6948	17.0865	16.8545	18.3309	18.1014	17.0529	16.7651	17.8426	17.6892	18.1573	17.8993	16.1745	16.1638	17.0729	17.3469	17.2829	17.2842	18.5845	18.1997	17.496	17.3304	18.3694	18.0004	18.1542	18.0079	18.0638	18.1413	18.0749	18.024	18.6539	18.1649	18.1316	17.9555	18.2926	18.0002	17.8126	17.6116	18.0233	17.6567
PE(P-16:0_22:6)	Negative	0.0232643	0.10154	0	20.0399	19.9384	19.3782	19.3311	20.1987	19.8716	19.8729	19.7566	20.574	20.4687	19.7231	19.686	19.2389	19.0255	20.6108	20.5862	20.0337	20.1651	19.849	19.8748	19.771	19.3518	21.0607	20.9737	19.7672	19.7611	20.9201	20.9555	19.821	19.6835	19.2552	19.5106	20.8379	20.6056	20.228	20.0795	20.0036	19.6852	20.0573	20.0676	19.5967	19.3275
PE(P-18:0_20:3)	Negative	0.00568421	0.14274	0	18.2989	18.1561	18.1117	18.0707	18.4252	17.9716	17.891	17.918	17.9428	17.633	19.1508	19.0578	18.6872	18.6049	17.3371	17.5449	18.3016	18.3329	17.6318	17.2232	18.3322	18.1984	18.4952	18.5507	17.9982	17.8597	18.9473	18.8136	18.1721	18.0534	18.2199	18.2345	18.4757	18.1847	19.053	18.6565	18.5731	18.3736	17.8086	17.6947	18.4223	18.1453
PE(P-18:0_20:4)_A	Negative	0.0591422	0.10335	0	17.0289	16.9256	16.9904	16.9243	16.0453	15.9706	16.9494	16.9568	16.5552	16.312	16.7624	16.5988	16.7277	16.8613	16.665	16.3335	16.6929	16.8903	17.0384	16.9171	17.5458	17.3689	17.1165	17.2334	17.5089	17.4372	17.4162	17.3981	17.3216	17.3615	17.443	16.9748	17.4985	17.3744	17.652	17.0665	16.4884	16.5271	16.8926	16.7734	17.2678	17.2313
PE(P-18:0_20:4)_B	Negative	0.042968	0.13097	0	21.9183	21.7873	21.9122	22.0152	21.8051	21.5174	21.9117	21.8559	21.5734	21.3757	21.9921	21.8607	21.5982	21.7372	21.4899	21.4487	21.3185	21.6104	21.8196	21.3512	22.1759	22.1012	22.2131	22.4386	22.4327	21.947	22.5895	22.3909	21.889	21.9028	21.8131	21.6644	22.3964	22.0922	22.3049	22.016	21.8375	21.6202	21.6305	21.5646	21.6624	21.236
PE(P-18:0_22:4)	Negative	0.0853484	0.15202	0	17.2739	17.1219	17.5077	17.2585	16.9653	16.1377	18.0048	17.8287	16.6631	16.5374	17.991	17.693	17.6316	17.5589	15.5204	16.1553	16.624	16.8041	17.0211	16.9672	17.8886	17.717	16.9471	16.7219	18.2065	17.6423	17.6253	17.5156	17.5827	17.3115	17.4191	17.1157	17.6301	17.2271	17.3662	17.5458	17.3345	16.842	16.432	16.8888	17.1176	16.9698
PE(P-18:0_22:5)_A	Negative	0.0142409	0.13688	0	18.7379	18.601	18.2694	18.4441	18.5648	18.0384	18.9421	18.6527	19.0569	18.8764	18.5365	18.3939	18.5684	18.6329	19.0311	19.0883	18.3894	18.0309	18.3325	17.9605	18.5692	18.4262	19.3613	19.4576	18.9287	18.6794	19.1879	19.102	18.4256	18.4965	18.3561	18.4752	19.3067	19.0479	18.5586	18.4923	18.7225	18.5927	18.2828	18.1842	19.3675	18.9482
PE(P-18:0_22:5)_B	Negative	0.214159	0.06818	0	17.0553	16.9871	16.6605	16.6678	17.2508	16.7696	17.5186	17.5233	17.2982	17.0182	16.5676	16.6804	17.0492	16.9272	17.5945	17.6949	16.4163	16.6424	16.6765	16.3069	16.9095	16.8745	17.4741	17.5405	16.8646	16.7204	18.147	18.0022	17.6229	17.7574	16.9162	16.9635	17.1438	17.029	17.1321	17.1269	16.7161	16.4543	16.2245	16.2895	16.9219	16.7527
PE(P-20:0_18:2)	Negative	0.0232643	0.17977	0	17.1572	16.9774	16.3179	16.2667	17.816	17.58	17.6337	17.2699	16.8511	16.6097	16.141	16.2178	17.5785	17.2546	16.0875	16.5198	16.2439	16.2598	17.1014	16.9846	16.7311	16.3585	17.2741	16.4426	17.5407	17.1898	18.6163	18.5551	17.4422	17.5135	16.3672	16.6312	17.312	17.0242	17.479	17.3121	17.9714	17.5206	17.7778	17.4421	16.8607	16.5953
PE(P-20:0_20:4)	Negative	0.00771934	0.14521	0	18.4204	18.2751	18.4974	18.3609	18.7822	18.511	19.4063	19.3897	18.0664	17.9856	17.9988	17.7112	18.5758	18.5844	17.7045	17.8388	17.5841	17.7422	18.7865	18.2958	18.7852	18.6406	18.0975	18.0558	18.6176	18.1785	19.1078	18.9434	18.6771	18.5194	17.7622	17.6636	19.0218	18.7674	18.8469	18.9073	18.7781	18.4063	18.0823	18.0871	17.2286	16.9139
PI(16:0_18:1);PI(16:1_18:0)	Negative	0.214159	0.11771	0	16.843	16.7253	17.31	16.7676	17.2109	16.9051	17.1078	16.9581	17.7583	17.7809	16.7309	16.939	17.2283	17.3443	17.4104	16.9174	17.2039	16.4374	17.2071	17.2433	16.4649	15.9114	16.4763	16.3863	16.0482	16.3621	16.1064	16.2741	16.3335	16.7381	16.9453	16.8566	16.6808	16.3038	16.7092	16.5657	16.4226	16.3244	16.7105	16.7709	16.7956	16.7201
PI(16:0_18:2)	Negative	0.165397	0.08155	0	17.1164	17.0349	17.2091	16.723	17.3508	17.1599	17.7072	17.5804	17.6348	17.4007	17.0156	16.9436	18.2622	18.35	17.5064	17.3436	17.1173	16.6108	16.8669	17.1022	16.1319	16.0454	16.3623	16.4259	16.3086	16.5769	16.6515	16.8006	16.0029	16.9079	17.85	17.6073	17.3716	16.8724	17.2894	17.082	16.6315	16.609	17.4343	17.2663	17.6238	17.2889
PI(16:0_20:3);PI(18:1_18:2)_B	Negative	0.351202	0.0834	0	15.0513	14.9679	15.1874	14.6465	15.3442	14.8668	15.2757	15.3837	15.2253	15.1324	14.6891	14.8143	16.1688	16.0912	15.7331	15.2455	15.5524	15.0464	14.6475	15.4321	14.5749	14.0437	14.4161	14.1503	14.2797	14.4392	13.7961	14.0017	14.5494	15.1124	15.752	15.9126	15.0381	14.9117	14.7255	14.4661	15.0877	14.9358	15.0404	14.8527	15.9434	15.8737
PI(16:0_20:4)	Negative	0.416523	0.07413	0	17.3513	17.2772	17.4726	17.0784	17.0436	16.6964	18.2528	17.9948	17.8599	17.8647	17.0937	17.3212	17.5855	17.7265	17.6776	17.3774	17.7675	16.8759	17.7109	17.9127	17.3949	16.9562	17.2722	17.2878	15.9121	16.1398	16.7512	17.0699	16.7073	17.3615	17.6894	17.5598	17.8972	18.012	17.5534	17.201	16.9823	17.002	16.8001	16.8906	17.6017	17.2146
PI(18:0_18:1)	Negative	0.111933	0.12554	0	17.1266	17.0011	17.5881	17.1456	17.8088	17.3339	16.7624	16.531	17.6932	17.5237	16.3518	16.7852	18.1015	18.0336	17.5573	17.3905	17.4133	17.0661	17.6231	17.8307	16.7502	16.4124	16.1277	16.0458	17.3694	17.686	16.6563	16.7822	16.6013	16.9881	16.8923	16.5646	16.6387	16.238	16.8446	16.2863	16.9346	16.6759	17.9132	17.9104	16.9046	16.792
PI(18:0_18:2)	Negative	0.302771	0.073	0	18.7053	18.6323	18.7707	18.4023	19.0677	18.7422	18.8588	18.5938	18.7467	18.5341	18.2157	18.6291	19.7063	19.8119	19.1025	18.7827	18.9878	19.0025	18.7386	18.7167	18.0835	17.6724	17.9341	17.8764	18.6946	18.7686	18.3395	18.6047	17.8007	18.2812	19.1076	18.9412	18.9178	18.7714	18.5969	18.2466	18.3122	18.2513	19.0582	19.2832	19.0665	18.7342
PI(18:0_20:3)	Negative	0.37567	-0.08066	0	17.7333	17.814	17.6755	17.3758	18.1368	17.7669	17.7094	17.7503	17.491	17.5821	18.1308	18.5359	18.0176	18.3797	18.7169	18.4926	18.6529	18.2651	17.9674	18.3051	16.8943	17.0454	17.0879	17.1027	17.0589	17.5983	16.8105	17.2785	16.4594	17.2307	18.4345	18.4266	17.8756	17.784	17.712	17.4707	17.3166	17.4118	17.7386	17.7891	18.7802	18.6886
PI(18:0_20:4)	Negative	0.657025	0.00813	0	20.4676	20.4595	20.3788	20.3538	20.4974	20.1173	20.8147	20.5571	20.2814	20.2115	20.5671	20.7864	20.4083	20.7111	20.7781	20.6932	20.8804	20.8226	20.6074	20.827	20.4874	20.2211	19.9326	19.943	20.24	20.4643	19.6953	20.2506	19.8937	20.3455	20.8474	20.6386	21.023	20.9353	20.4806	20.116	20.0215	20.0447	20.5914	20.5211	20.9266	20.6302
PI(18:0_22:5)	Negative	0.759292	-0.02335	0	15.4716	15.4949	15.446	15.2026	15.7024	15.7247	16.2743	16.0335	15.8801	16.0254	15.7453	15.9949	16.2597	16.4483	16.6999	16.6212	15.4627	15.1629	15.4128	15.4583	15.1943	14.918	15.5711	15.3495	14.2493	14.615	14.7131	15.0001	14.0874	14.6227	15.7899	15.9278	16.3937	16.1153	15.7792	15.3065	14.8262	14.8485	14.7328	15.2069	15.2119	15.3167
PI(18:0_22:6)	Negative	0.400775	-0.0657	0	15.6744	15.7401	15.5027	15.1525	16.6982	16.4271	15.8087	15.9341	17.1417	17.1169	15.687	15.9403	16.0834	15.976	17.4028	16.7876	16.1981	16.4705	16.0969	15.917	14.9159	14.5163	16.2708	16.3846	14.631	14.7888	15.448	16.0038	14.3138	15.1589	14.9424	15.2619	15.7709	15.9617	15.8318	15.7538	14.6382	14.8721	15.2421	15.4065	14.863	14.971
PI(18:1_20:4)_A	Negative	0.36623	0.073	0	15.2962	15.2232	15.8734	15.4311	15.4793	15.036	15.8132	15.5978	15.8551	15.925	14.5392	14.7453	16.5227	16.6722	15.9486	15.4631	15.5829	14.9445	15.7105	15.9661	15.2492	15.0121	15.1258	14.9266	14.5545	14.9903	14.3931	14.6047	14.4659	14.869	15.4457	15.432	15.6452	15.5354	14.6527	14.464	14.8785	14.6946	15.0283	14.9934	15.1605	15.1611
PI(18:1_20:4)_B	Negative	0.95633	6e-05	0	15.1117	15.1116	15.4595	15.1139	14.995	14.4067	16.1591	15.9495	14.9754	14.8912	14.4277	14.6031	15.9077	15.9377	14.5709	14.3706	15.3985	14.7731	15.3991	15.7187	15.1969	14.8776	14.2578	14.1597	14.8339	15.4392	13.6357	14.1556	15.3018	15.8937	16.0349	16.2453	15.7065	15.5952	14.5988	14.6074	15.2442	15.0854	14.7763	15.1663	15.3543	15.2431
PE(P-16:0_20:4)	Negative	0.00082806	0.18076	1	21.0307	20.85	20.6104	20.5601	20.9001	20.6858	20.5663	20.409	20.9293	20.5922	21.1284	20.8958	20.8936	20.6384	20.5088	20.1846	19.9489	20.1671	20.926	20.941	21.4971	21.152	21.5439	21.358	20.8115	20.4873	21.6735	21.4969	20.9084	20.7989	20.8961	20.8895	21.8791	21.7827	21.8503	21.4923	21.2993	21.1054	21.2025	20.9509	20.6411	20.4117
PE(P-16:0_20:5)	Negative	0.000554471	0.28584	1	18.873	18.5872	17.2353	17.0084	18.8216	18.8043	17.3347	17.2861	20.7164	20.3696	18.5664	18.3369	17.6969	17.4905	20.9158	20.4631	18.5466	17.1883	19.3904	19.1426	18.7261	18.1886	21.2335	20.9674	17.4279	16.8428	20.6218	20.7104	18.6422	18.1465	17.5897	17.6251	19.8731	19.529	18.5679	18.4407	19.2145	18.9826	18.1228	18.1946	18.2166	18.0261
PE(P-18:0_18:1)	Negative	0.00113747	0.15635	1	19.1072	18.9508	18.8833	18.8525	19.1617	18.8324	19.0805	18.8898	19.0595	18.8029	19.0306	19.0219	19.0006	18.7944	18.7943	18.9192	18.8743	18.7306	18.9681	18.5276	19.1523	19.0555	19.3767	19.3089	19.6756	19.4776	19.9721	19.8624	18.9997	18.9693	18.6164	18.4183	19.2765	18.9996	19.17	18.9901	19.0287	19.1239	19.2228	19.1626	18.7997	18.2769
PE(P-18:0_18:2)	Negative	0.000970371	0.2147	1	20.4532	20.2385	19.8816	19.7874	20.4525	20.1797	20.1421	19.7738	20.1602	19.9179	20.0484	20.0772	20.8181	20.5684	19.6877	19.6839	19.7898	19.728	19.6221	19.6337	20.22	19.8435	20.4249	20.0015	20.9865	20.7227	21.8665	21.7794	20.7201	20.7546	20.2599	20.2946	20.2925	20.0536	20.997	20.3913	20.9073	20.542	21.2069	20.8031	20.5794	20.2335
PE(P-18:0_20:5)	Negative	0.00187944	0.19744	1	18.9713	18.7739	17.8327	17.8259	19.1136	18.8281	18.4785	18.0153	20.2615	20.0917	18.2577	18.1155	18.5083	18.349	20.6737	20.6294	18.9866	17.9651	18.7127	18.7815	18.6775	18.3714	21.0432	20.7266	17.8108	17.593	20.6269	20.5209	18.7837	18.7717	17.9617	18.2269	19.5037	19.3114	18.5566	18.484	19.0355	18.8426	18.2659	17.895	18.3358	18.1329
PE(P-18:0_22:6)	Negative	0.00187944	0.12433	1	20.0953	19.971	19.527	19.5562	20.3473	20.1125	19.9438	19.8564	20.6774	20.4177	19.7626	19.6844	19.3786	19.2501	20.5176	20.535	20.0338	19.9627	19.8979	19.9326	19.7658	19.4596	21.2997	21.1774	20.1538	19.8446	21.3733	21.2165	20.0351	19.9985	19.1674	19.1969	20.5164	20.2677	20.5203	20.3882	19.8099	19.5436	19.8716	19.9556	19.3067	19.0633
PE(P-18:1_22:6)	Negative	0.00376142	0.16249	1	18.5194	18.357	18.3453	18.2355	18.5858	18.2292	18.3081	18.2112	19.7129	19.5451	18.0113	17.6978	17.9871	17.841	19.363	19.1225	18.5455	18.8718	18.5928	18.2468	18.1185	17.914	19.4886	19.3382	18.2409	18.0097	19.502	19.3636	18.1699	17.8984	17.3056	17.4138	19.0706	18.7466	18.7441	18.6045	18.4966	18.1725	18.3979	18.3772	17.4024	17.2996
PE(P-34:1)	Negative	0.000554471	0.18142	1	18.6752	18.4938	18.4796	18.2256	18.7037	18.3411	18.4171	18.2305	18.7921	18.7217	18.4438	18.347	18.395	18.2597	18.6489	18.4669	18.2429	18.3981	18.3029	17.938	18.8335	18.5	18.8271	18.7699	18.9342	18.5593	19.1353	19.1773	18.2583	18.1403	18.4694	18.152	19.1666	18.8995	18.7506	18.5048	19.1102	18.9986	19.0995	19.0775	18.4928	18.1675
PI(18:1_18:2)_A	Negative	0.000387883	0.26636	1	14.8903	14.624	15.4853	15.1013	15.7094	15.2081	14.6208	14.3917	15.0789	14.9089	12.8877	12.7958	17.3501	17.075	15.0546	14.5507	15.2881	14.9968	15.454	15.1621	15.2788	14.5819	13.355	12.8995	15.1912	15.1368	14.0525	14.1356	13.5622	13.7489	15.1975	14.996	14.3186	14.1359	13.7182	13.3355	15.063	14.7096	16.0859	15.9907	15.0549	14.6188
CE(18:1)	Positive	0.00293221	-0.26354	-1	22.0499	22.3134	21.9796	22.1827	22.344	22.3089	21.9969	22.3194	21.7724	21.9815	21.6991	22.0294	21.8008	22.1964	21.5339	22.1894	22.1417	23.0182	21.8109	22.2809	22.2252	22.3262	21.6114	21.7511	23.0598	23.039	21.8076	22.0177	22.0666	22.4375	22.2136	22.4077	22.1641	22.3505	22.3033	22.3221	22.1774	22.3587	22.1005	22.4592	22.1886	22.2918
CE(18:2)	Positive	4.25e-05	-0.26482	-1	18.5594	18.8243	18.4743	18.8548	18.7522	18.9148	18.9418	19.1397	18.1491	18.4283	18.812	18.8186	19.2883	19.6001	18.2628	18.9083	19.0231	19.4029	18.4434	18.9345	19.1767	18.9752	18.2868	18.4377	18.3302	18.4617	17.8722	18.0348	18.3697	18.4675	18.4429	19.0307	18.2575	18.6871	18.7516	19.2997	18.9233	18.8442	17.5153	17.939	19.1157	19.3059
CE(18:3)	Positive	2.49e-05	-0.98337	-1	19.7858	20.7692	19.4406	20.9106	19.5243	20.3823	21.0315	21.623	19.7568	20.5042	17.8796	18.8458	20.6884	21.451	18.1034	20.3694	19.4103	21.2323	18.6528	20.4322	21.2065	21.2023	19.6468	20.3846	21.2815	21.5823	19.9747	20.6718	19.972	21.2593	19.5926	20.2184	21.1912	21.6738	20.0226	21.0929	20.3331	21.3622	19.3573	20.7135	18.6498	19.4711
Cer(d18:1_24:0)	Positive	0.000414807	-0.20389	-1	17.3307	17.5346	16.8059	17.0029	17.0528	17.1136	17.9905	18.1996	16.9926	17.8623	16.6756	17.0022	17.4415	17.4686	17.3541	18.0627	16.6116	15.9213	16.6213	17.1644	17.294	17.0548	17.8114	17.6589	16.8326	17.1352	16.6438	17.3006	17.4576	17.6005	17.7735	17.2877	18.656	18.9254	16.9097	17.2714	18.0734	18.3496	17.804	18.6678	17.8114	17.6417
DG(16:0_18:2_0:0)	Positive	0.00977206	-0.27651	-1	23.6557	23.9322	23.6983	23.7589	23.4315	23.7469	23.8945	24.2695	23.2488	23.5754	23.1186	23.3834	23.5543	23.9212	23.2224	23.8105	23.3442	23.0938	23.3452	23.9025	23.6596	23.8215	23.3839	23.6478	24.2631	24.2711	23.1748	23.4323	23.6317	24.0221	24.3004	24.1518	24.1208	24.498	23.5757	24.0674	23.8523	24.4403	24.2453	24.7027	24.0493	24.128
DG(18:1_0:0_18:1)	Positive	5.72e-05	-0.28772	-1	22.3886	22.6763	22.3476	22.223	21.6275	22.2986	22.7664	23.218	21.824	22.1664	21.5617	21.9072	23.1337	23.3098	21.6143	22.0515	21.9125	21.3129	22.2176	22.8804	22.4298	22.62	21.9777	22.6261	22.8381	22.7453	21.856	22.0182	22.2836	22.6742	23.1451	23.2086	23.1882	23.3466	22.3157	22.6457	22.6219	23.1756	23.1565	23.8603	22.9541	23.2385
DG(18:1_18:2_0:0)	Positive	1.75e-05	-0.42309	-1	21.706	22.1291	22.2807	22.4802	21.0811	21.7247	22.3803	23.1509	21.6077	21.9468	20.9624	21.528	21.7746	22.0122	21.2043	22.0326	21.3817	21.3974	21.2354	22.4252	22.3091	22.1602	21.0413	21.5917	22.6437	22.3551	21.1308	21.8467	21.5288	21.6979	21.9297	22.0759	22.2965	22.6449	21.5438	21.6701	22.0588	22.762	22.0976	22.9767	21.6312	22.1025
DG(18:2_0:0_18:2)	Positive	0.000118986	-0.81356	-1	20.7035	21.517	21.2214	22.0943	20.0372	20.7852	21.6801	22.8392	20.2699	20.8968	19.9427	20.8601	20.8655	21.3682	19.7495	20.8988	19.431	20.5988	20.6331	21.6785	21.7842	22.0343	20.5302	21.3001	21.6797	22.0372	20.0944	21.0985	20.7464	21.1805	20.8073	21.1309	22.1445	22.7375	20.5149	21.5731	21.4027	22.6196	20.5532	21.8409	19.9816	20.7683
MG(18:2_0:0_0:0)	Positive	9.42e-05	-0.00295	-1	19.9631	19.9661	19.1174	19.188	19.5413	19.706	20.7061	20.9814	20.1392	20.1086	19.6731	19.5628	19.3705	19.4874	20.2933	20.2614	20.2189	19.6833	19.3899	19.4344	19.4948	19.2121	20.317	19.9964	19.5948	19.598	20.0429	20.0586	20.5544	20.526	19.8174	19.6957	21.0162	21.0831	20.2045	20.252	20.3913	20.6956	19.884	20.3545	19.4957	19.4363
PC(0:0_16:0)_B	Positive	0.00014773	-0.11335	-1	16.9219	17.0353	15.6272	15.7303	16.7088	16.7649	17.0586	17.4471	17.7299	18.1973	16.3694	16.1637	16.8121	16.7638	18.5324	18.5996	16.6791	15.3971	16.7034	17.0337	15.8037	15.8288	17.9262	18.0608	15.9184	15.7758	18.0421	18.1139	16.5472	17.2241	16.1633	16.0891	18.6742	18.6467	16.6897	17.1528	17.5815	17.7205	17.3532	17.9956	15.5181	16.0004
PC(0:0_18:0)_A	Positive	4.25e-05	-0.33663	-1	17.0741	17.4107	17.0592	17.2459	16.5968	17.0136	17.2835	17.5354	16.6827	16.9826	16.5625	16.947	16.8134	17.0533	16.4001	17.0394	16.7981	16.4177	16.8498	17.5874	17.1677	17.2618	17.0443	17.5198	17.7037	17.6847	16.4296	16.7375	17.367	17.6765	17.4953	17.825	18.1209	18.3992	16.4078	17.114	17.5776	18.0993	17.7617	18.3406	17.3596	17.7334
PC(0:0_18:0)_B	Positive	0.001192	-0.14494	-1	17.715	17.86	17.549	17.7807	17.4802	17.4735	17.98	18.3348	17.6784	17.8224	17.1492	17.2923	16.8274	17.2731	17.3379	17.5868	18.2566	18.4003	17.0717	17.5153	17.5532	17.3821	18.1361	18.1356	18.0933	17.9621	17.9071	18.0052	18.202	18.3467	17.7764	17.7064	18.667	18.8467	17.4091	17.5163	17.9612	18.3738	17.888	17.9556	17.3769	17.4897
PC(0:0_18:1)_A	Positive	9.85e-06	-0.17362	-1	19.9756	20.1493	19.6039	19.6317	19.7729	19.9088	20.0472	20.4057	19.1786	19.5721	19.8515	19.7749	19.9422	20.0457	19.5651	19.8269	19.6077	19.8415	19.1663	19.5952	19.1274	18.9775	19.4794	19.3838	20.6626	20.4996	20.253	20.4989	20.5628	20.9831	20.4947	20.6988	20.8682	21.1237	19.4242	19.4965	20.705	20.9775	20.7882	21.2662	20.4118	20.4768
PC(0:0_18:1)_B	Positive	0.000221217	-0.25352	-1	17.8687	18.1223	17.5746	17.7915	17.5061	17.7935	18.0785	18.2524	17.2432	17.4477	17.9312	18.0188	18.2956	18.5734	17.3511	17.5803	17.9161	17.8223	17.4432	17.9446	17.4651	17.5364	17.7396	17.9027	17.6903	17.6032	17.56	17.9616	18.3147	18.7279	18.1514	18.5595	18.7953	19.0802	17.6512	17.9773	18.5352	18.9571	17.6679	18.1373	18.4646	18.7776
PC(0:0_20:4)	Positive	9.85e-06	-0.28782	-1	18.7534	19.0412	18.8975	18.9594	18.1518	18.3382	19.3974	19.7539	18.1844	18.5633	18.5818	18.6696	18.4035	18.8134	17.8048	18.0864	18.3452	18.4734	18.6742	19.0938	19.2762	19.2614	18.8809	18.9163	18.7521	18.881	18.8466	19.1358	19.2762	19.6538	18.6788	18.9583	20.4328	20.7451	18.4648	18.9821	19.3864	19.8609	18.4353	19.1543	18.1963	18.523
PC(14:0_20:4)	Positive	0.00224332	-0.15913	-1	20.4048	20.5639	20.245	20.3972	20.3426	20.3657	20.5609	20.7785	20.3558	20.6818	19.5891	19.5578	20.6813	20.6882	20.0248	20.2498	20.347	20.4544	20.0276	20.5701	20.482	20.4244	20.1827	20.1512	20.7861	20.5998	20.236	20.2457	20.7595	21.0371	20.3408	20.6464	20.7443	20.9122	20.4688	20.6165	20.8584	21.1051	20.5677	21.1815	20.4946	20.6144
PC(15:0_0:0)	Positive	0.000274115	-0.16423	-1	20.2673	20.4315	20.3138	20.3485	19.2872	19.4218	20.6379	20.9672	20.2861	20.6579	20.4105	20.2785	20.3736	20.6627	19.7145	19.8059	19.7851	19.3108	20.6001	20.9471	20.0279	20.0285	20.3629	20.2921	19.9461	19.9619	20.7193	21.1212	20.3134	20.6943	19.9754	20.1555	21.5585	21.9229	20.4921	20.6152	20.9211	21.2434	19.4767	20.0109	20.1429	20.1835
PC(15:0_16:0)	Positive	0.00340149	-0.19228	-1	23.8067	23.999	23.8266	23.8893	23.6946	23.83	24.0612	24.2758	23.9514	24.2259	23.6696	23.7984	23.8461	24.0863	23.5241	23.8105	23.9016	24.0569	23.7162	24.1299	23.7718	23.9083	23.741	23.7445	23.8555	23.9656	23.5269	23.5377	24.0313	24.3401	23.6228	23.8564	24.1845	24.2387	23.7855	24.0954	24.108	24.3736	23.5551	24.0246	23.7607	23.7922
PC(15:0_18:2)	Positive	0.00260525	-0.26975	-1	24.3606	24.6304	24.2664	24.4801	24.4126	24.5093	24.2911	24.6066	23.7596	24.11	24.3928	24.5774	24.6192	24.8813	23.9408	24.3232	24.6219	24.8827	23.941	24.403	24.1496	24.234	23.9152	24.0397	24.6679	24.6562	23.967	24.2828	24.4521	24.7806	24.6577	24.9668	24.745	24.9711	24.7801	25.0243	24.7386	25.2111	24.0354	24.5958	24.8589	25.0717
PC(15:0_20:3)	Positive	5.72e-05	-0.20799	-1	19.8584	20.0663	20.1536	20.2226	19.2417	19.439	20.2423	20.4952	20.2911	20.6287	19.5496	19.7622	19.8972	20.0847	18.998	19.3209	20.3123	19.8829	19.9596	20.3968	21.3922	21.4507	19.3233	19.3807	19.4039	19.4612	19.4285	19.5611	19.968	20.2833	19.3811	19.6814	20.6568	20.9097	20.3551	20.6665	20.397	20.7218	18.9396	19.4864	19.2762	19.4912
PC(15:0_20:4)	Positive	1.33e-05	-0.20045	-1	19.8175	20.018	19.1329	19.035	19.6149	19.8835	19.9217	20.2283	20.0925	20.4702	19.6676	19.8023	20.2463	20.534	19.6929	20.3041	20.2694	19.7306	19.3659	19.842	19.0194	18.85	19.948	20.0574	19.2984	19.3435	19.8409	20.0622	19.8291	20.1207	20.083	20.1866	20.19	20.5428	20.0071	20.3307	20.3594	20.6418	18.9188	19.6786	20.852	20.715
PC(15:0_20:5)	Positive	0.000221217	-0.26386	-1	25.3038	25.5677	25.5056	25.6941	25.1559	25.3354	25.4795	25.7174	24.8617	25.2671	25.1517	25.3362	25.1282	25.4708	24.6163	24.9956	25.0171	25.716	24.9799	25.4123	25.8082	25.7913	25.0427	25.0237	25.794	25.8823	25.1748	25.4158	25.4665	25.7301	25.3514	25.4985	26.153	26.5238	25.7075	25.8489	25.5787	25.9181	25.0949	25.6767	25.0091	25.1001
PC(15:0_22:6)	Positive	0.000337779	-0.29526	-1	22.5911	22.8864	22.1134	22.3564	22.3261	22.6097	22.6602	23.0167	23.6849	24.01	22.1923	22.3738	21.999	22.3711	23.8889	24.3862	22.7471	22.7249	22.4295	22.9639	22.2451	22.3236	23.4515	23.4985	21.8829	21.8774	23.8976	24.1561	22.1415	22.572	21.5162	21.8916	23.9724	24.2613	22.2957	22.6472	23.2002	23.5915	21.4925	22.2594	21.6858	21.8366
PC(16:0_16:0)_B	Positive	0.000118986	-0.2839	-1	23.0236	23.3075	23.2944	23.4198	22.8461	23.1166	23.3022	23.7128	22.9221	23.1516	22.6659	22.8456	23.0182	23.3751	23.28	23.6033	22.6597	23.0262	22.7927	23.1642	23.491	23.6415	22.9623	23.0075	23.3011	23.2538	22.6863	22.8836	22.8071	23.1998	23.0512	23.2707	23.8599	24.1925	22.9186	23.2316	23.2409	23.7276	22.6716	23.4151	22.7014	22.9117
PC(16:0_16:1)	Positive	0.000601504	-0.30294	-1	23.881	24.184	23.5849	23.7392	24.3275	24.7035	23.9309	24.1915	24.225	24.531	23.6998	23.9683	23.1337	23.4737	24.4436	24.869	24.1785	24.6987	23.6563	23.9373	23.491	23.6639	24.2974	24.3629	24.1765	24.325	24.221	24.3652	23.5901	23.9921	23.5279	23.7427	24.5733	24.8939	24.0701	24.3257	23.6049	24.0495	23.7478	24.4396	23.1406	23.4067
PC(16:0_17:0)_A	Positive	0.00448417	-0.25344	-1	19.515	19.7685	20.3522	20.3999	19.5211	19.5943	19.3199	19.7048	19.4465	19.7927	18.9476	19.284	19.0379	19.235	19.0409	19.4137	19.7763	20.2429	18.5039	19.0912	19.3488	19.4106	19.1859	19.2251	20.2067	20.155	19.7667	19.8393	19.8939	20.1869	19.6758	19.9687	19.8878	20.0232	19.8902	20.1411	19.3962	19.8418	19.7257	20.1983	19.3767	19.621
PC(16:0_17:1);PC(15:0_18:1)	Positive	2.49e-05	-0.2485	-1	26.0198	26.2683	25.857	25.907	26.1076	26.1858	25.844	26.1679	25.5325	25.9008	25.7939	25.9683	25.9251	26.222	25.5527	26.0781	25.9539	26.6278	25.4037	25.7881	25.7219	25.7734	25.525	25.5463	26.8277	26.8987	26.0348	26.3172	26.1324	26.5448	26.5086	26.5467	26.4876	26.6573	26.234	26.2612	26.2624	26.6904	26.4417	26.9845	26.2506	26.3005
PC(16:0_18:0)	Positive	0.00293221	-0.23173	-1	20.5746	20.8063	20.5306	20.6284	20.5134	20.6303	20.7626	21.2363	20.419	20.6425	20.1677	20.2802	21.2147	21.3823	20.2286	20.6532	20.5665	20.412	19.5118	19.885	20.6494	20.5069	18.9651	19.0863	20.557	20.5585	20.1433	20.697	20.5858	20.9165	21.6116	21.713	21.7055	21.9645	20.3355	20.6396	21.2844	21.7318	20.9291	21.6334	20.8107	20.9291
PC(16:0_18:1)	Positive	1.75e-05	-0.28342	-1	18.7095	18.9929	18.719	19.0117	17.8393	18.1663	19.519	19.8248	18.8468	19.1322	18.4724	18.4001	19.373	19.7059	17.9719	18.2369	18.3282	18.2644	18.0018	18.7815	19.9958	19.9555	17.7503	18.0286	18.0132	17.9531	18.3475	18.7903	18.6245	19.2517	18.7285	19.0713	20.6837	20.9798	18.913	19.0687	19.7228	20.0814	18.268	18.8977	18.0714	18.2562
PC(16:0_18:2)_A	Positive	9.85e-06	-0.28794	-1	16.8117	17.0997	16.4103	16.5653	16.963	17.1483	16.9622	17.2907	17.804	18.1621	16.0056	16.2414	16.9294	17.1735	17.6786	18.0381	17.3115	16.837	16.298	16.83	16.8028	17.0106	16.6873	16.9727	15.762	15.7634	17.2072	17.3802	16.4814	16.8837	16.3881	17.0533	18.4259	18.6639	16.5873	16.9923	17.2048	17.3975	16.4971	17.4939	15.8278	16.095
PC(16:0_18:2)_B	Positive	0.000720665	-0.31147	-1	17.5192	17.8307	17.7512	17.7395	17.1066	17.5671	17.7025	18.0435	16.6615	17.4516	16.8978	17.1479	17.7193	18.0875	16.4815	17.172	17.1232	16.5733	17.418	18.2295	17.972	18.001	17.6473	17.9386	18.2436	18.3226	16.9101	17.235	17.4361	17.7862	18.039	18.0976	18.2885	18.4621	17.0412	17.4681	17.5318	18.1833	18.4604	19.0054	17.9528	18.1021
PC(16:0_18:3)_A	Positive	0.001192	-0.22018	-1	20.1016	20.3218	20.3869	20.5572	19.9402	19.9796	20.0375	20.4542	20.1706	20.3445	20.0204	20.3108	19.6139	19.8245	19.6968	19.9441	20.3877	20.4604	20.1203	20.7082	20.5632	20.66	20.0443	20.0212	20.3523	20.4792	19.9834	20.1997	20.173	20.5052	19.913	19.982	20.7103	20.8779	19.6781	19.8603	20.3025	20.5862	19.8942	20.5422	20.0434	20.1382
PC(16:0_20:1);PC(18:0_18:1)	Positive	9.85e-06	-0.20948	-1	18.3199	18.5293	18.3696	18.4279	18.5227	18.4617	18.1168	18.5295	17.2675	17.4537	18.2856	18.3376	19.1547	19.4592	17.3345	17.5547	18.3593	18.4843	18.2399	18.7524	18.5268	18.5689	18.3552	18.3497	18.7215	18.8664	17.9464	17.7212	18.2119	18.4463	18.2992	18.5877	18.8274	19.1047	18.3957	18.7018	18.7641	18.9738	17.8745	18.6505	18.8242	19.1552
PC(16:0_20:3)_A	Positive	1.33e-05	-0.32402	-1	19.3122	19.6362	20.0103	20.1389	18.8544	19.0953	18.8553	19.3518	18.4079	18.8099	19.376	19.4792	19.7192	19.9837	17.7196	18.2078	19.4091	19.4968	19.3218	19.9295	20.5499	20.8096	19.3749	19.4425	19.8179	19.79	19.0737	19.3023	19.2535	19.785	19.0918	19.6218	20.9056	21.1447	18.7492	18.9922	19.6979	20.2472	19.323	19.9224	18.7328	19.1738
PC(16:0_20:3)_B	Positive	0.000720665	-0.3185	-1	20.3136	20.6321	20.939	21.1467	19.9659	20.0795	20.7368	21.0436	19.6936	20.0932	20.2143	20.3469	20.4277	20.7196	19.3418	19.5614	20.0682	20.6285	20.4319	20.9329	21.4228	21.5451	20.3355	20.4677	20.5457	20.7679	20.0625	20.2538	20.3011	20.7442	19.8939	20.2631	21.3918	21.7959	20.3239	20.6621	20.6103	20.9699	20.0713	20.7669	19.4939	19.8531
PC(16:0_20:4)_B	Positive	2.49e-05	-0.32653	-1	15.1457	15.4722	15.391	15.4074	14.6692	15.2888	15.7824	16.5773	15.2254	15.8317	14.4645	15.122	15.2092	15.1296	14.2889	14.9514	15.0908	14.2868	14.9986	15.2522	15.8026	15.3675	15.1663	15.3795	15.3364	15.2467	14.3146	14.5934	15.2123	15.5254	15.7816	15.7529	15.9071	16.5887	14.017	15.3145	15.2557	15.8671	15.5522	16.2196	15.4484	15.7421
PC(16:0_20:5)	Positive	2.49e-05	-0.21895	-1	20.4996	20.7186	20.3651	20.2954	20.5432	20.7561	20.5656	20.8975	20.6565	20.8698	19.9346	20.0482	20.9877	21.1649	20.4027	20.544	20.6666	20.6097	20.3385	20.7998	20.4091	20.3755	20.4699	20.704	20.4257	20.3852	19.9918	20.0552	20.6454	20.9945	20.3533	20.8172	20.563	20.9289	20.9546	21.0898	20.6635	21.079	20.3613	21.0435	20.6943	20.913
PC(16:0_22:4);PC(18:1_20:3)_B	Positive	0.00014773	-0.2713	-1	23.9171	24.1884	23.7719	23.9503	23.9784	24.1213	24.0936	24.4082	23.4008	23.794	23.8689	24.0114	24.6192	25.0784	23.4182	23.8287	23.9738	24.1655	23.8057	24.3715	23.7913	23.8115	24.0206	24.1379	23.578	23.5078	23.3091	23.3652	23.8672	24.2752	24.1305	24.4267	24.3784	24.5262	24.3001	24.6555	24.3189	24.6592	23.2327	23.8904	24.484	24.7822
PC(16:0_22:5);PC(18:0_20:5)	Positive	9.85e-06	-0.22277	-1	19.3679	19.5907	19.6313	19.7759	18.519	18.9189	20.1126	20.3826	19.8684	20.2311	19.0084	19.0811	20.1051	20.2518	18.1174	18.4674	19.4478	19.2762	19.7245	20.4213	21.2699	21.0684	19.2996	19.506	18.6897	18.5177	18.3507	18.4965	19.4507	19.6666	18.6534	19.1003	20.0897	20.3593	19.7813	20.0897	20.0549	20.1916	18.2635	18.817	18.9209	19.1948
PC(16:0_22:5);PC(18:1_20:4)_A	Positive	1.75e-05	-0.29404	-1	25.0356	25.3296	25.2635	25.4563	24.7857	25.0364	25.4245	25.6091	24.5536	24.9268	24.8008	24.9756	25.1774	25.5855	24.0769	24.6033	24.73	25.4541	25.0482	25.4727	25.6301	25.6722	24.9982	25.2075	25.4655	25.3803	24.6958	24.8226	25.0467	25.4359	24.9797	25.1563	25.8889	26.1629	25.3559	25.627	25.3377	25.7108	24.8501	25.4803	24.6022	24.8168
PC(16:0_22:6)	Positive	9.85e-06	-0.26443	-1	20.6012	20.8656	20.6984	20.807	20.3037	20.4725	21.8717	22.285	20.437	20.6478	20.8822	21.1351	21.4889	21.7795	19.0115	19.3344	19.9103	20.1403	20.3644	20.759	21.3344	21.4903	20.5643	20.5854	20.1825	20.2175	19.8935	19.8931	20.7724	21.2844	20.5979	21.1538	21.0707	21.3508	21.263	21.6186	21.012	21.1456	19.6738	20.3482	20.6904	20.8635
PC(16:0_O-16:0)	Positive	2.49e-05	-0.25541	-1	21.6683	21.9237	21.4127	21.5162	21.7147	21.9381	22.2544	22.6113	21.7918	22.2244	21.4473	21.7472	22.0453	22.3209	22.1413	22.4976	21.2267	21.3959	21.4165	21.9809	21.639	21.7294	22.2652	22.3395	21.3406	21.2457	21.2207	21.249	21.4371	21.7356	21.711	22.0479	22.4264	22.6662	21.6279	21.8372	21.8536	22.1192	20.9945	21.7024	21.3996	21.5698
PC(16:1_0:0)	Positive	0.000852065	-0.31059	-1	19.8797	20.1903	19.6211	19.9177	20.0814	20.1727	21.2749	21.6003	19.5958	20.0136	20.0373	20.1676	20.4719	20.8669	18.409	18.8305	19.3612	19.964	19.4118	19.9172	20.2748	20.2745	19.739	19.9894	19.3089	19.3181	19.6437	19.7627	20.1447	20.622	20.3933	20.888	20.4302	20.52	20.8542	21.0744	19.3323	19.6731	19.1221	19.8508	20.0861	20.382
PC(16:1_18:1)	Positive	7.54e-05	-0.26188	-1	23.1186	23.3804	22.6872	22.7152	23.7153	23.85	23.3673	23.7313	23.6638	23.9095	22.99	23.197	22.6665	23.0804	23.6788	24.0157	23.3577	23.7663	23.0581	23.545	22.6558	22.7027	24.1599	24.2575	22.7811	22.8137	23.3303	23.3421	22.9124	23.3041	22.4269	22.9145	23.766	23.9915	23.3161	23.5914	22.6926	22.9257	22.7858	23.4024	22.3596	22.553
PC(16:1_18:2)	Positive	0.000601504	-0.23897	-1	25.6338	25.8727	25.4692	25.6155	25.7882	26.0122	25.6197	25.8899	25.092	25.3865	25.2366	25.4238	25.9411	26.1076	25.0512	25.4107	25.3943	26.0091	25.1817	25.559	25.2375	25.234	25.1828	25.2575	26.3345	26.3447	25.6731	25.7738	25.7495	26.1964	26.0146	26.215	26.0514	26.2944	25.7801	25.9133	25.9898	26.2182	26.0288	26.6187	25.8589	25.9742
PC(16:1_20:4)	Positive	0.00014773	-0.12468	-1	23.5477	23.6724	23.7396	23.8162	23.7857	23.8893	23.1625	23.3314	23.1512	23.3486	22.8755	22.9312	24.0302	24.2828	23.109	23.3985	23.6715	23.8992	23.1354	23.3263	23.479	23.4097	22.3125	22.1572	24.5855	24.4686	23.4802	23.5478	23.5474	23.798	23.8632	23.8888	23.7237	23.9082	23.2642	23.3029	24.0558	24.2206	24.1917	24.7698	23.7894	23.7518
PC(16:1_22:5)	Positive	0.00138185	-0.22225	-1	19.619	19.8413	19.9531	20.1204	20.0857	20.4582	19.5605	19.8759	20.0159	20.2889	18.9185	19.0319	19.4506	19.789	20.1729	20.4545	20.5006	20.3352	19.3216	19.8519	20.091	20.0135	19.3001	19.3456	19.6753	19.5395	19.7303	19.8139	19.1302	19.4754	18.7666	19.0238	20.4464	20.6025	19.2161	19.6555	19.3864	19.6772	19.6259	20.171	19.0323	19.3013
PC(16:1_22:6)	Positive	0.000601504	-0.53079	-1	22.4899	23.0207	22.5978	22.8182	22.2741	22.743	23.1	23.9444	21.806	22.3997	21.2779	22.2838	22.9442	23.2963	22.0868	22.9615	21.418	21.879	21.9877	22.9527	22.2561	22.1888	21.8189	22.2039	24.0701	24.1873	22.6629	23.0462	22.4607	22.744	22.9761	23.2414	23.0986	23.5804	22.0258	22.5037	23.0155	23.9385	23.4152	24.3764	22.5059	23.125
PC(17:0_18:1)_B;PC(16:0_19:1)	Positive	1.33e-05	-0.13685	-1	18.3831	18.5199	18.3468	18.2586	18.3869	18.4355	18.4122	18.7197	18.5392	18.6257	17.4853	17.5809	19.075	19.1	17.6962	17.9484	18.3359	18.5208	18.0628	18.4982	18.4493	18.1396	17.9311	17.7883	19.0186	18.832	18.4317	18.4375	18.5895	18.9269	18.5365	18.8611	18.3434	18.6902	17.8132	17.959	18.7607	18.9931	18.9723	19.3578	18.4751	18.7252
PC(17:0_18:2)	Positive	9.42e-05	-0.10788	-1	20.7549	20.8628	20.9463	20.953	20.6456	20.7581	20.8924	21.2224	20.1216	20.2332	19.8145	19.6637	21.8526	22.1435	19.6105	19.6331	20.1188	19.8325	20.534	20.8965	21.2118	21.0158	19.6219	19.5476	21.2117	21.063	20.7243	20.8178	20.8868	21.2416	20.9382	21.1778	21.698	21.7855	20.5058	20.7238	21.9814	22.1055	20.9336	21.4791	20.8489	20.9626
PC(17:0_20:3)_A	Positive	7.54e-05	-0.0347	-1	16.9486	16.9833	16.2299	16.2017	16.5575	16.7269	16.4523	16.8826	18.4149	18.5795	15.0447	14.8719	17.8974	18.0812	18.4435	18.4685	16.6054	15.2708	16.6566	17.1615	16.3555	16.0983	16.934	16.8321	16.3662	16.3112	19.2758	19.2583	16.4107	16.6758	15.9409	16.1086	18.2965	18.3409	15.701	15.7918	18.4573	18.4454	16.6766	17.1384	16.2562	16.4214
PC(17:0_20:3)_B	Positive	0.000601504	-0.2912	-1	17.202	17.4932	17.7812	17.9502	16.6521	16.8912	17.4704	17.7983	17.0982	17.515	16.3448	16.7311	17.9333	18.0369	16.2058	16.5978	17.1711	17.5986	17.3174	17.7778	18.2031	18.2346	17.5137	17.5742	17.5482	17.3129	17.0444	16.8328	17.3472	17.698	16.4883	17.3874	17.9038	18.2302	16.8373	17.3661	17.4451	17.8407	16.991	17.649	16.7441	16.8416
PC(17:0_20:4)_A	Positive	1.33e-05	-0.27732	-1	17.636	17.9133	18.2292	18.3605	17.4218	17.7129	17.8978	18.3545	17.5704	17.688	16.8477	17.0805	18.3823	18.5836	16.8203	17.127	17.4733	18.0057	17.7483	18.3295	18.1506	18.2908	17.5575	17.7407	18.1213	17.9543	17.2788	17.2593	17.8451	18.4049	16.9965	17.7039	17.9661	18.0662	17.5645	17.8964	18.0833	18.2217	17.1983	17.9005	17.5674	17.5859
PC(17:0_20:4)_B	Positive	9.85e-06	-0.53987	-1	15.9536	16.4935	15.9632	16.2032	15.6642	16.0638	16.2794	17.3366	15.7182	16.3851	14.447	15.3146	16.3441	16.7071	15.5739	16.3718	15.4692	15.4309	15.3172	16.5749	16.2329	16.3801	15.2948	16.1127	16.8514	16.7712	15.4537	16.0839	15.7803	15.8047	16.3919	16.7033	16.6483	17.1956	16.0047	16.6285	16.2262	17.3984	16.7226	17.6607	16.689	16.7429
PC(17:0_20:5)	Positive	0.00755437	-0.25274	-1	18.2757	18.5284	18.8205	18.8237	17.981	18.1562	19.0023	19.3602	17.9013	18.2529	17.5272	17.6501	18.9287	19.2231	17.5253	17.9102	18.0169	18.2332	17.9154	18.4559	18.8791	18.8822	17.903	18.0118	18.6102	18.4327	17.5377	17.6427	18.4815	18.885	18.5369	19.0246	19.1717	19.2687	18.1002	18.4127	18.72	19.1192	18.0998	18.7419	17.8555	18.0816
PC(17:0_22:5)	Positive	2.49e-05	-0.756	-1	19.3794	20.1354	19.3901	19.9975	18.7705	19.4274	20.1483	21.4661	18.8325	19.2435	18.1602	19.4981	20.151	20.6793	18.5516	19.7818	19.0915	18.8745	18.92	20.5788	19.6316	19.7856	18.976	20.1272	19.8086	19.91	19.0869	19.5682	19.4285	19.8893	19.4534	20.0208	20.0149	20.7453	19.7123	20.5648	20.3353	21.4475	19.2835	20.4407	19.8414	20.662
PC(17:0_22:6)	Positive	1.33e-05	-0.16363	-1	17.1683	17.3319	17.4593	17.2998	16.7873	17.0332	17.3042	17.7844	16.9656	17.2436	16.4654	16.3765	18.7347	18.951	16.9335	17.2179	16.8262	16.2726	16.7523	17.3984	17.46	17.3305	16.3139	16.4333	16.8033	16.6914	16.9473	16.9906	17.0756	17.3948	17.2221	17.5202	17.9477	18.1812	16.8341	17.1865	18.2431	18.4824	16.3532	16.93	17.9369	17.9197
PC(18:0_18:2);PC(18:1_18:1)_B	Positive	1.33e-05	-0.21005	-1	19.7857	19.9957	20.1339	20.1541	18.9057	18.9879	20.0578	20.4423	19.7154	20.0512	18.9542	19.0217	20.164	20.3152	19.5276	19.7351	19.4161	19.6706	18.8562	19.4474	20.5897	20.5859	19.7776	19.8229	20.0541	20.005	20.4238	20.5334	20.1059	20.4963	19.701	19.992	20.4393	20.5596	19.9541	20.2283	19.877	20.1775	19.55	20.0215	19.5097	19.6664
PC(18:0_20:2)	Positive	0.000183172	-0.67454	-1	17.3846	18.0592	17.0383	17.6269	16.6789	17.3556	17.9333	19.1213	18.3991	19.1318	16.2488	17.2043	16.6852	17.1338	18.7294	20.0107	16.8377	16.9517	17.2305	18.2907	17.5057	17.3016	18.6842	19.0789	17.4637	17.5008	18.7739	19.5498	16.7361	17.1831	16.0906	16.8915	19.2108	19.691	16.7436	17.4807	17.7912	19.0264	16.6801	17.7115	16.2315	16.941
PC(18:0_20:3)_A	Positive	2.49e-05	-0.92362	-1	18.3933	19.3169	17.9818	18.9348	18.0451	19.2762	19.3384	20.8115	19.1851	20.1627	17.6493	18.6397	17.7202	18.2064	19.7443	20.3461	17.915	18.8855	17.8881	19.3655	18.1829	18.6409	18.8052	19.8999	18.9003	19.1264	18.4823	19.6242	18.1029	18.8923	17.7987	18.2254	19.45	20.134	18.3773	19.2762	18.353	19.9447	18.7159	19.8359	17.2299	18.11
PC(18:0_20:3)_B	Positive	0.001192	-0.28494	-1	16.5665	16.8514	16.988	17.1002	16.0233	16.4461	16.6718	16.7641	16.1831	16.7111	15.6374	15.9073	16.9835	17.1663	15.8297	16.3719	16.0169	15.8924	15.8811	16.794	16.9312	16.9905	16.538	17.0572	17.1824	16.972	16.2663	16.3419	16.4669	17.0056	17.1823	17.2239	17.0584	17.145	16.6119	16.9258	16.6895	17.2081	17.0589	17.7633	17.1286	17.2414
PC(18:0_20:4)	Positive	1.75e-05	-0.24938	-1	20.1085	20.3579	20.8292	20.9199	19.6829	19.9984	20.0157	20.3984	20.2006	20.4486	19.3435	19.4867	20.2467	20.3402	19.6388	20.0351	20.6381	21.0118	19.2105	19.7866	20.1945	20.1307	19.6379	19.6705	20.7161	20.6774	20.2962	20.4042	20.3763	20.7616	20.1607	20.5111	20.462	20.6045	20.0874	20.464	20.1555	20.494	20.2695	20.8673	20.0088	20.1474
PC(18:0_22:4)	Positive	1.33e-05	-0.17891	-1	20.4151	20.594	20.4579	20.5109	20.344	20.4414	19.7567	20.1185	20.2906	20.4591	19.4807	19.4991	20.8826	21.0915	19.6274	19.9412	19.8291	19.9518	19.4512	19.8171	20.3865	20.3932	19.9952	19.941	21.4191	21.4334	20.9976	21.0652	20.8938	21.1765	20.864	21.0564	20.5928	20.72	20.4365	20.6779	20.8571	21.1741	21.0798	21.6465	20.6592	20.7653
PC(18:0_22:5)_A	Positive	3.27e-05	-0.22159	-1	18.6086	18.8302	18.7182	18.9355	18.5166	18.678	17.7437	17.788	18.113	18.5687	18.0789	18.2533	19.3552	19.5791	17.5323	17.9988	18.6121	19.0143	17.6616	18.0992	18.1864	18.2094	18.2801	18.4095	19.5275	19.6082	18.724	18.7803	18.8571	19.4371	19.3721	19.4965	18.7747	18.765	19.0116	18.9958	19.1523	19.2885	18.4883	18.9869	19.4662	19.7112
PC(18:0_22:5)_B	Positive	1.33e-05	-0.23091	-1	22.0911	22.322	22.4938	22.6937	21.7527	21.8684	21.9076	22.2773	22.0663	22.2824	21.5273	21.6118	22.6268	22.71	21.0349	21.2565	21.7354	21.9937	21.5585	22.1738	22.4529	22.4653	21.9255	22.0209	22.6218	22.5779	22.2779	22.4224	22.664	23.0277	22.0566	22.3865	22.6191	22.6769	22.4847	22.8386	22.1913	22.63	21.7847	22.3388	22.0395	22.1868
PC(18:0_22:6)	Positive	9.85e-06	-0.23807	-1	18.9735	19.2116	19.7008	19.7326	18.4472	18.7896	19.2907	19.6914	18.4476	18.555	18.7701	18.9505	19.1729	19.2768	17.2322	17.4508	18.778	19.2586	18.4893	19.0636	19.6206	19.6534	18.5066	18.5588	19.4559	19.4371	19.1155	19.105	19.5627	19.9702	19.1468	19.5293	19.3408	19.539	19.7873	20.0785	19.1552	19.3558	18.4123	19.0545	19.0376	19.1813
PC(18:1_18:1)_A	Positive	7.54e-05	-0.2109	-1	14.7327	14.9436	15.1889	15.1869	14.1241	14.5549	14.7541	15.2818	14.0579	14.2328	14.1972	14.2839	14.7544	14.9193	13.8122	14.1161	14.2066	13.7668	14.1353	14.9905	14.9004	14.985	14.6238	14.9434	15.8258	15.7348	14.5224	14.7503	14.8767	15.2063	15.386	15.6515	15.1878	15.2514	14.8452	15.1578	14.7028	14.9736	15.1047	15.5543	15.4486	15.3313
PC(18:1_18:2)	Positive	0.00293221	-0.25373	-1	17.6928	17.9465	18.4502	18.4103	17.6622	17.9036	17.1619	17.7863	17.0847	17.2807	17.5984	17.6614	18.3838	18.6616	16.38	16.8035	18.0329	17.9432	16.5963	17.1655	17.4853	17.5285	17.1696	17.4374	18.2768	18.2588	18.0583	18.0439	18.2876	18.5994	18.1268	18.5644	17.5365	17.8672	18.0784	18.4513	17.7781	18.0439	17.0702	17.7296	18.6381	18.7899
PC(18:1_20:3)_A	Positive	4.25e-05	-0.23384	-1	21.2251	21.459	21.919	22.0155	20.783	21.05	21.3294	21.6347	20.841	21.0814	21.0819	21.245	21.4532	21.6749	19.8725	20.1167	20.914	21.2274	20.7714	21.3633	21.6284	21.4945	21.0214	20.9685	21.9757	21.8977	21.7667	21.6781	21.7352	22.2508	21.0513	21.7014	21.5239	21.6752	21.8186	22.0677	21.1485	21.2801	20.5365	21.2835	21.3311	21.473
PC(18:1_20:4)_B	Positive	1.33e-05	-0.3119	-1	15.8722	16.1841	16.8023	16.6883	14.9174	15.7021	16.1242	16.394	15.4733	15.9925	14.4866	14.8808	16.2654	16.3229	15.2052	15.95	16.0287	15.959	15.2078	16.1216	16.1583	15.8853	15.5812	15.8524	16.5477	16.5493	15.0434	15.3449	16.0322	16.129	16.7231	16.6367	16.1096	16.6082	15.9502	16.3204	15.9875	16.6404	16.6649	17.3646	16.1357	16.3406
PC(18:1_20:5)	Positive	1.75e-05	-0.17885	-1	19.2179	19.3968	19.5697	19.5161	19.189	19.3445	18.7004	18.9484	19.3623	19.4069	18.1104	18.2949	19.7477	20.0109	18.717	18.9567	19.0894	19.6704	18.1727	18.7619	18.8177	18.8208	18.329	18.369	20.5496	20.5321	19.3762	19.3682	19.4809	19.6767	19.9165	19.8355	19.2762	19.265	19.0992	19.1474	19.734	19.8485	20.0084	20.7568	19.112	19.4048
PC(18:1_22:6)	Positive	0.000337779	-0.38819	-1	21.7126	22.1008	19.6354	22.6493	21.3912	21.5779	21.7525	22.0566	21.8142	22.1372	21.1867	21.229	22.2864	22.4897	21.2181	21.5252	21.9696	22.3248	21.3778	21.9321	22.276	22.1706	21.5801	21.6082	22.3489	22.3328	21.8488	21.9865	22.1998	22.6149	21.7312	22.1522	22.379	22.5294	22.0979	22.4001	21.9531	22.1905	21.5749	22.2107	21.6305	21.8985
PC(18:2_0:0)_A	Positive	9.85e-06	-0.27113	-1	18.7046	18.9758	19.8794	19.9967	18.2674	18.5341	18.926	19.2762	18.3823	18.5298	18.4282	18.2252	18.6049	18.8558	17.341	17.9137	18.9031	19.2752	18.1834	18.9223	18.9845	18.9779	18.5668	18.7474	19.4078	19.3031	19.475	19.2762	18.9129	19.4383	18.4511	19.2212	18.9538	19.1238	19.3108	19.5953	18.6028	18.768	17.866	18.7078	18.6454	18.8275
PC(18:2_0:0)_B	Positive	1.33e-05	-0.24324	-1	19.3008	19.5441	19.446	19.4872	18.7899	19.0748	19.2762	19.7152	19.4318	19.8264	18.936	18.9707	19.1808	19.5235	19.0625	19.3658	19.4668	19.8327	18.2983	18.8426	19.4022	19.2762	19.161	19.3592	20.0421	20.0294	19.767	19.8859	19.636	20.0125	19.1416	19.2762	19.8345	19.9421	19.5885	20.0104	19.0551	19.3394	19.1846	19.7129	19.3155	19.398
PC(18:2_22:5);PC(20:3_20:4)_A	Positive	0.00293221	-0.27859	-1	22.5225	22.8011	22.564	22.7763	22.5643	22.6127	22.5473	22.8109	21.85	22.1489	22.134	22.2503	22.1386	22.4447	22.1008	22.543	21.949	22.4441	21.9756	22.4833	22.6781	22.8797	22.4229	22.5885	23.0321	23.1713	22.5636	22.8458	22.5252	22.973	23.0032	23.036	23.3241	23.5356	22.748	22.9773	23.0174	23.4844	22.8629	23.4554	22.4497	22.5612
PC(18:3_0:0)	Positive	2.49e-05	-0.24662	-1	23.8105	24.0571	23.9086	24.1116	23.5747	23.8097	23.6197	23.9602	23.2298	23.4759	23.2873	23.4475	23.6271	23.7933	22.9661	23.5045	23.7558	24.4334	23.0844	23.6324	23.8576	23.7811	23.3234	23.4419	24.6449	24.7192	24.0202	24.1627	24.0846	24.4616	24.4181	24.2714	24.5085	24.6679	24.0156	24.1763	24.0406	24.4321	24.3185	24.8726	23.9252	23.9873
PC(19:0_20:4)	Positive	0.000274115	-0.29068	-1	22.7396	23.0302	22.9302	23.0219	22.6933	22.8543	22.834	23.0737	21.9426	22.1195	22.736	22.9828	22.4816	22.7474	22.0277	22.4874	22.3128	23.116	21.7902	22.487	22.6277	22.6991	22.3606	22.5009	23.4063	23.5611	23.221	23.486	22.9296	23.3487	23.5685	23.3117	23.5741	23.6107	23.0945	23.2169	22.8105	23.3762	23.1627	23.7349	22.2872	22.8684
PC(20:0_20:4)	Positive	0.00014773	-0.24841	-1	23.5743	23.8227	23.1909	23.4074	23.4564	23.6701	23.5559	23.8878	22.9801	23.2965	23.3928	23.4051	23.3968	23.6634	23.0629	23.4816	22.963	23.3371	22.9904	23.403	23.467	23.6302	23.364	23.544	24.3223	24.1971	23.7161	23.7888	24.0313	24.4689	24.0317	24.1066	24.275	24.4788	23.7963	23.9598	23.9938	24.3736	23.7584	24.4293	23.7412	23.9252
PC(20:2_0:0)	Positive	5.72e-05	-0.2438	-1	22.6487	22.8925	22.4395	22.5179	22.3542	22.5054	22.7219	22.9704	22.1314	22.3116	22.3889	22.3297	22.5207	22.7004	22.2642	22.6469	22.2223	22.6315	21.9695	22.4713	22.4984	22.7317	22.5848	22.7763	23.2339	23.3263	22.7908	22.9839	23.0609	23.4182	23.1098	23.2533	23.5122	23.6845	22.82	23.088	23.0016	23.4	22.6498	23.2777	22.6981	22.8242
PC(20:2_20:4);PC(18:1_22:5)	Positive	9.42e-05	-0.16382	-1	16.9554	17.1192	16.721	16.6832	16.5533	16.3926	17.498	17.7655	16.4977	16.9572	15.736	15.8073	17.0535	17.2916	16.5183	16.6666	16.7576	17.0733	15.8181	16.4074	16.9293	17.0015	16.7216	16.8167	16.6936	16.8645	16.6909	16.9796	17.5084	17.9016	18.1427	18.1275	18.0825	18.269	16.8574	16.8087	17.6226	17.8966	17.8855	18.1101	16.8202	16.5642
PC(20:3_0:0)	Positive	2.49e-05	-0.24697	-1	21.4981	21.745	21.3969	21.7465	21.0698	21.2947	21.5136	21.947	21.0694	21.3115	20.688	20.8915	21.4366	21.4156	21.0241	21.4121	21.4496	21.5736	20.5743	21.1949	21.2931	21.2754	20.7478	21.0049	21.7416	21.967	21.944	22.1189	21.7653	22.2685	22.2168	22.2536	22.3019	22.3703	21.7624	21.9983	21.9311	22.2724	22.5079	23.1471	21.5266	21.4367
PC(20:4_20:4)	Positive	0.00224332	-0.28651	-1	16.483	16.7695	16.8105	16.773	16.0517	16.3341	17.0455	17.5782	15.2096	15.722	15.8333	16.0895	16.7642	16.8992	15.4943	15.6912	15.6634	15.8918	15.1187	15.9528	16.1302	16.0447	15.1968	15.3332	16.8091	16.9076	17.0262	17.348	17.3136	17.9141	17.922	18.04	17.477	17.709	16.8038	17.0381	17.1071	17.5239	17.2891	17.9372	16.5933	16.6624
PC(20:4_P-18:1)	Positive	4.25e-05	-0.28999	-1	20.4279	20.7178	20.5059	20.9102	20.0825	20.4092	20.4839	20.906	19.6664	20.089	19.8488	19.9836	20.3341	20.4491	20.1501	20.6165	20.1283	20.6358	19.4692	19.8816	20.422	20.4987	19.9932	20.2819	21.0001	20.9909	20.7605	21.0894	20.567	21.0132	21.1691	21.0696	21.1246	21.26	20.7762	20.946	20.5763	21.2194	21.2909	21.7576	20.2081	20.3491
PC(20:5_0:0)	Positive	2.49e-05	-0.27425	-1	22.6488	22.923	22.5252	22.6528	22.2472	22.5235	22.8435	23.1231	22.048	22.4247	22.05	22.2151	22.6985	22.9362	22.3946	22.6842	22.2262	22.5234	21.8384	22.2738	22.484	22.6568	22.1771	22.4465	23.1088	23.2912	22.8128	23.0318	23.22	23.6004	23.0928	23.1684	23.2833	23.5289	22.9434	23.0914	23.1584	23.6731	23.2337	23.8701	22.5898	22.7453
PC(22:4_0:0)	Positive	1.75e-05	-0.26564	-1	23.7867	24.0524	24.0135	24.2976	23.6629	23.6925	23.6807	23.8545	23.5763	24.01	23.1734	23.2338	23.579	23.7837	23.5173	23.8646	24.3644	24.831	23.2207	23.643	23.732	23.88	23.8307	24.0397	24.5486	24.5493	23.8097	23.9654	24.0078	24.348	23.8759	24.0974	24.4318	24.7258	23.8698	24.185	23.5413	23.9385	23.7688	24.4084	23.5302	23.6997
SM(d18:1_16:0)_B	Positive	0.000118986	0.34504	-1	22.4564	22.1113	23.2832	22.7415	23.0656	22.7055	21.3767	21.0866	21.5976	21.1026	22.6082	22.6724	22.8528	22.6741	21.9672	21.7941	22.5844	22.9931	23.2088	22.7926	22.589	22.5507	21.5811	21.0846	23.0852	22.754	21.6713	20.784	21.97	21.6348	22.7798	22.7634	21.6481	21.0549	22.4531	21.7208	22.5432	21.4814	23.3042	23.1759	22.9575	22.6591
SM(d18:2_23:0)	Positive	9.85e-06	-0.1572	-1	18.3919	18.5491	18.2221	18.4383	18.3167	18.2684	19.3195	19.509	19.8509	20.0107	18.362	18.3977	19.004	19.1668	19.5332	19.3696	17.6604	18.6069	18.6248	19.1706	19.7311	19.8259	18.9144	19.1795	17.037	17.5389	20.389	20.1018	16.946	17.0862	15.9594	16.7573	18.9247	19.0983	18.8044	18.9774	18.6789	18.322	17.4387	17.421	16.1201	15.735
SM(d18:2_24:0)	Positive	9.85e-06	-0.25959	-1	16.7558	17.0154	16.3523	16.6448	16.305	16.6449	17.6115	18.0918	19.0029	19.2909	16.0652	16.3059	17.6244	18.0562	18.4383	18.8427	16.0808	16.4446	16.5961	17.4148	17.6545	17.9855	17.753	18.0876	15.3086	15.7175	20.7075	20.1876	14.8208	15.2167	13.5397	14.7045	17.7684	17.9214	16.6136	17.106	17.4736	17.0644	15.7164	15.121	13.6834	13.4589
SM(d19:1_24:1)	Positive	0.00101666	-0.14647	-1	18.5719	18.7184	18.5979	18.6819	19.202	19.3068	18.1288	18.5436	19.8577	19.9715	18.7981	18.9768	17.8473	18.076	20.0605	20.3488	19.349	20.0675	19.2105	19.2746	20.1669	20.14	18.7449	18.9594	17.744	17.8912	19.8598	19.3902	17.9257	17.7706	16.5477	17.3377	17.7425	18.1622	18.8903	19.0173	18.0197	17.839	17.5317	17.3321	17.2133	17.2805
SM(d35:1)	Positive	4.25e-05	-0.2258	-1	19.586	19.8118	19.8461	20.275	19.8457	19.9427	19.7651	19.7356	19.8408	19.7826	19.4234	19.7418	19.3761	19.8239	19.5303	20.0289	20.1202	20.3375	19.7265	20.2635	20.3161	20.0599	19.0258	19.2873	19.8939	19.5963	19.1632	19.3256	19.4441	19.922	19.2855	19.9363	19.0218	19.5998	19.6794	19.8174	19.7412	19.7612	19.0765	19.2081	19.5981	19.7902
TG(42:0)	Positive	1.33e-05	-0.94278	-1	18.4478	19.3905	17.8264	19.014	18.5074	19.4237	19.6838	20.1983	19.9418	20.3678	16.3197	17.5492	18.9604	19.808	19.451	21.3011	18.9457	20.0324	17.5826	19.376	18.9705	19.3173	19.2734	20.047	18.6818	18.9527	19.2286	19.8049	17.9134	18.9499	16.8891	18.1797	19.5846	20.2805	17.7989	19.0217	19.2339	20.1748	17.1913	18.1751	16.971	17.8366
TG(42:1)	Positive	9.85e-06	-3.47357	-1	13.9658	17.4393	11.9948	17.5454	15.0434	17.6341	14.6568	15.0712	16.95	16.2023	13.481	17.8911	15.164	17.6675	18.0062	17.5331	14.2537	17.8476	14.5424	17.6269	15.0169	17.2017	13.2799	17.4707	15.7524	18.1434	15.7814	15.3963	10.6258	17.2512	15.6889	18.2642	13.1139	17.1394	12.1832	17.4625	11.3509	18.0107	11.327	19.2467	11.1026	18.1807
TG(44:1)	Positive	9.85e-06	-0.04291	-1	12.8442	12.8872	12.2597	11.5045	11.3224	11.7402	13.0508	13.6813	12.6754	13.2058	12.1242	12.3716	13.8554	13.6215	12.5846	12.2116	12.0645	11.2126	13.4408	13.2466	11.9795	12.4658	13.2504	13.3909	11.9522	12.2456	13.7442	13.7209	13.0278	12.8682	12.4353	12.6621	15.1614	15.2183	12.698	13.0777	14.2795	14.067	12.6739	13.1443	12.305	12.0868
TG(46:1)	Positive	9.85e-06	-0.10552	-1	14.8586	14.9641	13.2584	13.351	13.7696	13.8199	14.9106	15.6666	16.469	16.8846	13.8376	13.8575	15.044	15.1543	17.297	17.3185	14.1784	12.5078	14.4203	15.2494	13.6337	13.5517	16.126	16.1015	13.4854	13.5429	16.926	17.232	14.5506	14.5527	13.5045	13.8577	17.3388	17.4945	14.2601	14.414	16.1708	16.4743	14.3718	14.6862	13.6193	13.5654
TG(46:2)	Positive	9.85e-06	-0.28282	-1	15.0115	15.2943	14.1628	14.3285	14.3092	14.326	15.3526	15.7251	16.0231	16.5722	14.4124	14.204	14.196	14.4247	16.8847	17.095	14.8469	14.6849	14.9473	15.4902	14.2408	14.269	16.4526	16.467	14.1909	14.2803	16.8801	17.3534	14.6995	15.2395	13.9329	14.3343	17.0414	17.4303	13.8709	14.3488	15.8188	16.3356	14.0659	14.7652	13.9008	14.2122
TG(48:1)	Positive	1.33e-05	-0.14457	-1	17.7845	17.929	17.6257	17.6799	17.5906	17.7151	17.6553	18.0116	17.7623	18.0319	17.645	17.6979	17.066	17.288	17.0025	17.3791	18.4556	18.1906	17.5769	17.8266	17.9907	17.9939	18.0745	18.1295	18.0776	17.8893	17.6081	17.928	18.0337	18.3173	17.6333	17.8495	18.9347	18.957	17.3095	17.4196	18.1637	18.5359	17.7992	18.2625	17.6844	17.4774
TG(48:2)	Positive	9.85e-06	-0.19999	-1	21.6397	21.8397	21.4794	21.4446	21.6535	21.8067	22.1328	22.4669	21.3108	21.6129	21.6411	21.7307	21.2149	21.4978	21.1472	21.4398	21.7375	21.45	20.6925	21.2225	21.3546	21.3094	21.1921	21.3729	21.9649	21.9844	21.5551	21.6549	21.9364	22.2795	22.279	22.4899	22.3129	22.5052	21.6679	21.9278	22.1518	22.5119	21.6613	22.2476	21.7082	21.8383
TG(48:3)	Positive	9.85e-06	-0.23843	-1	22.1972	22.4356	21.5858	21.7026	22.0155	22.068	22.4559	22.7181	23.2768	23.4379	21.5813	21.7548	22.0544	22.3374	23.4544	23.8105	22.0233	22.352	22.3319	22.716	22.0634	22.1589	23.4609	23.5619	21.4296	21.444	23.0267	23.2334	21.636	22.0059	21.4473	21.6973	23.4692	23.6773	21.8048	22.1192	22.4815	22.8504	21.1359	21.7169	21.2087	21.3493
TG(48:4)	Positive	9.85e-06	-0.26066	-1	14.7361	14.9968	13.4927	14.0945	13.9981	13.7003	15.0297	15.168	16.4232	16.6866	13.9416	14.0582	14.5011	15.2203	16.5443	16.8073	15.0694	14.162	13.988	14.7504	14.9451	14.9731	14.967	15.2834	13.6623	13.7786	16.0882	16.6437	14.0162	14.5957	14.0675	14.2442	16.9215	17.4009	13.941	14.2407	15.7165	16.1556	13.52	14.2135	13.8897	13.7592
TG(49:1)	Positive	9.85e-06	-0.29889	-1	15.5662	15.8651	15.6478	15.547	14.8741	15.1084	16.1205	16.6818	15.927	16.3586	14.9637	15.2968	16.6692	16.97	16.0348	16.2937	15.2662	14.3957	15.0973	15.6927	16.1372	16.34	14.715	14.9564	14.6909	14.75	15.0992	15.2516	14.8695	15.5738	15.9319	16.3633	17.2512	17.574	14.9156	15.5362	16.5875	16.9181	15.1513	15.8839	15.375	15.8107
TG(49:2)	Positive	9.85e-06	-0.28698	-1	18.06	18.347	18.1913	18.3077	18.0434	18.3225	17.2415	17.585	17.1006	17.4468	18.1403	18.5437	18.9189	19.2248	17.0185	17.2464	18.5947	18.3703	17.9169	18.4299	18.2764	18.3458	17.899	18.0511	18.2509	18.3254	17.5943	17.7527	18.025	18.3802	18.4423	18.9201	18.9461	19.1618	17.3353	17.8564	18.619	19.0093	17.9268	18.5479	18.7192	19.1121
TG(50:1)	Positive	3.27e-05	-0.26331	-1	17.0476	17.3109	17.5071	17.5579	16.7654	16.7667	17.5561	17.9562	16.8759	17.2614	16.5499	16.7173	17.3894	17.7102	17.073	17.2505	16.7416	16.8178	16.8043	17.371	18.1382	18.2374	17.4858	17.6732	17.0657	17.0128	16.7927	16.9106	16.7241	17.26	16.5534	17.0907	18.0177	18.2022	16.5214	16.95	17.1355	17.5529	16.8825	17.2344	16.3724	16.6851
TG(50:2)	Positive	1.33e-05	-0.20949	-1	22.026	22.2355	22.7799	22.8194	22.4743	22.4525	21.553	22.2148	21.893	22.1699	21.2449	21.599	21.9156	22.1746	21.6977	22.0102	22.6033	22.8762	22.0798	22.395	22.2834	22.3396	20.868	20.9482	22.7633	22.7841	22.0115	21.9546	22.0464	22.3216	22.0797	22.2385	22.0349	22.1627	21.5979	21.7377	22.1661	22.4166	22.2785	22.7925	22.1492	22.3025
TG(50:3)	Positive	9.85e-06	-0.24632	-1	19.1351	19.3814	19.2151	19.2762	18.6231	18.8436	19.2	19.4083	20.4063	20.7604	18.2502	18.394	18.7601	19.21	20.7192	20.9137	19.2762	19.2296	18.9414	19.5109	19.2567	19.3071	19.1836	19.2627	18.46	18.6155	20.5249	20.6796	18.6182	18.9735	18.1644	18.593	20.4504	20.7776	18.3254	18.3496	19.8124	20.1187	18.3079	18.9788	18.2064	18.4252
TG(50:4)	Positive	9.85e-06	-0.42153	-1	16.2167	16.6382	16.111	16.3009	15.5978	15.9371	17.2626	18.2483	16.1073	16.3914	15.0582	15.4549	17.1872	17.4432	15.8085	16.3764	15.5375	15.4288	15.8625	17.0752	15.9519	16.2159	15.8266	16.3066	16.9746	17.0065	16.026	16.771	15.7808	15.9198	16.229	16.3331	17.6885	17.9853	15.5382	16.0957	16.6074	17.3644	17.0551	17.846	16.1226	16.2634
TG(50:5)	Positive	9.85e-06	-0.74558	-1	15.112	15.8576	15.2678	16.1408	14.345	14.6335	16.8671	18.1454	14.3387	15.4132	14.6761	15.7181	15.3501	15.8484	13.6485	14.3905	14.1458	14.4805	14.4995	15.9508	16.5861	16.6737	14.4589	15.1365	15.9062	15.7387	14.3289	15.0859	15.136	15.5852	15.5429	15.9107	16.165	16.5486	15.5352	16.348	15.5712	16.9374	14.8254	16.4013	15.0464	16.0651
TG(51:1)	Positive	9.85e-06	-0.26311	-1	17.1935	17.4566	17.2569	17.1858	16.0986	16.8169	17.6728	17.8188	16.5374	17.1748	16.3671	16.3499	17.4262	17.6258	16.7019	17.1156	16.4855	16.301	16.5206	17.1913	18.0561	18.0064	17.2156	17.5768	17.6135	17.7895	17.1069	16.9034	17.0223	17.4526	17.6741	17.9541	17.9308	17.8393	17.2624	17.6516	17.3377	17.9607	17.7359	18.5243	17.8484	17.8945
TG(51:2)	Positive	9.85e-06	-0.21209	-1	18.9835	19.1956	19.2641	19.3193	19.0652	19.2394	18.8756	19.165	18.623	18.9056	18.1925	18.1493	19.2762	19.2779	18.1749	18.5178	18.726	18.7851	17.7386	18.52	18.9624	18.8475	18.448	18.5401	20.0558	20.1002	19.8868	19.9316	19.621	19.9504	19.3327	19.6896	18.8627	19.0034	19.1132	19.3633	18.9748	19.4308	19.2762	19.7564	19.1992	19.4184
TG(51:3)	Positive	9.85e-06	-0.2812	-1	18.7209	19.0021	19.8067	19.9616	18.1121	18.5686	18.6554	19.2264	18.8869	19.1051	18.0791	18.3471	18.6378	18.9082	17.9906	18.4337	18.738	19.0994	18.3641	19.0598	19.1014	18.8095	18.5689	18.4209	19.2762	19.2762	19.2924	19.2501	19.0581	19.4339	18.5492	19.1231	19.0577	19.2737	19.0849	19.436	18.4974	18.7805	18.2036	18.7142	18.4566	18.8132
TG(51:4)	Positive	9.85e-06	-0.16504	-1	17.865	18.03	17.3068	17.5469	17.5505	17.5031	16.8214	17.1528	19.1072	19.4498	17.1017	16.7554	17.418	17.5754	19.5353	20.0507	17.6171	17.7452	17.3108	17.7012	18.2928	18.2058	19.7552	19.7889	17.4985	17.4064	19.1077	19.3688	17.7338	17.873	17.026	17.3139	18.4038	18.5844	17.3796	17.5425	17.6937	18.0152	17.0261	17.2182	17.6131	17.8023
TG(52:2)	Positive	0.000601504	-0.26624	-1	21.5751	21.8413	21.5561	21.6289	20.9888	21.2052	21.6945	22.1823	20.8806	21.283	20.9207	21.0682	21.5149	21.712	21.3277	21.7165	21.0284	21.4355	20.6178	21.1982	21.5546	21.6195	21.5407	21.565	22.0283	22.1021	21.7744	22.0243	22.0926	22.4725	22.0753	22.112	22.3739	22.5928	21.7825	22.0873	22.2834	22.6099	22.186	22.6247	21.2798	21.5862
TG(52:3)	Positive	0.001192	-0.29634	-1	16.5292	16.8255	17.1972	17.3869	16.3165	16.5099	16.1638	16.3518	14.9525	15.555	17.0422	17.2543	15.7537	15.065	14.9817	15.5521	16.0123	16.6103	16.1027	16.5812	17.0241	17.0449	16.7144	17.2268	17.2764	17.8114	17.4802	17.7504	16.4227	16.8036	17.9266	17.931	17.9196	18.4384	16.1226	16.4985	15.8244	16.0871	16.3671	17.1246	16.983	16.9272
TG(52:4)	Positive	1.33e-05	-0.15036	-1	19.7738	19.9242	20.647	20.8119	19.4618	19.6034	18.8566	19.2532	19.3419	19.5281	19.4576	19.4975	18.5433	18.7362	18.856	19.1349	20.2877	20.5707	19.8103	20.2571	20.2979	20.5302	20.4845	20.8331	20.9472	20.9739	19.846	19.8513	19.5038	19.8745	20.4257	20.6492	21.012	19.6107	19.2762	19.5121	19.0012	19.0182	19.5062	20.09	19.9142	20.1479
TG(53:2)	Positive	9.85e-06	-0.10984	-1	19.2497	19.3595	19.3081	19.3563	19.5868	19.7303	19.8922	19.9989	20.2136	20.2127	19.2678	19.4651	19.1119	19.3113	20.4109	20.8517	19.3233	20.3301	19.558	19.8546	20.9723	20.896	19.595	19.4545	18.0774	18.3628	20.1589	19.7895	18.3426	18.1324	17.4159	17.932	19.3628	19.2009	19.5727	19.7938	19.2191	18.9693	18.1644	18.1376	17.4396	17.4104
TG(53:3)	Positive	9.85e-06	-0.2732	-1	16.7675	17.0407	16.2687	16.6067	17.3702	17.3808	16.8005	17.0478	19.3974	19.57	16.874	17.1343	15.7469	16.2934	19.1281	19.3057	17.0351	17.619	16.9999	17.7029	17.884	17.8604	18.1668	18.5151	15.3967	15.7046	19.0364	18.8177	15.739	15.9904	14.083	15.1179	16.5846	17.0968	17.2907	17.6571	16.2628	16.1302	14.9006	15.0621	14.3845	14.2012
TG(53:4)	Positive	9.85e-06	-0.39412	-1	19.4291	19.8233	19.2626	19.6154	19.5603	19.7196	20.2051	20.4747	19.6763	19.9946	18.9892	19.2638	19.9886	20.331	19.1347	19.9485	19.7889	20.1821	19.1625	20.1329	19.7026	19.5972	18.9486	19.3829	19.3792	19.4394	19.3399	19.4264	19.4282	19.9431	18.9865	19.8529	19.6732	20.0665	19.1759	19.7163	20.0727	20.2915	18.7429	19.2762	19.3648	19.8104
TG(53:5)	Positive	9.85e-06	-0.61673	-1	18.9309	19.5476	18.8564	19.4404	19.6543	20.174	19.9986	20.3488	19.7035	20.2292	17.8245	18.5569	18.6776	19.404	19.5416	20.6265	19.5831	20.3485	18.4536	19.6281	19.3811	19.4391	19.3014	19.8868	19.1871	19.4424	19.3105	19.6479	18.7042	19.2101	17.7981	18.6476	19.1249	19.7065	19.0739	19.7499	18.6635	18.9914	18.1761	19.2	17.6036	18.2738
TG(54:1)	Positive	1.33e-05	-0.23881	-1	15.9783	16.2171	15.6782	16.0448	16.2682	16.3103	16.5322	16.9568	16.1253	16.5668	17.0166	16.8115	14.217	14.4897	16.5868	16.8891	15.8078	15.9277	15.6447	16.2874	16.2507	16.1298	15.7672	15.3957	16.509	16.5958	16.8576	16.5264	16.5637	16.8413	15.3065	16.8759	15.5078	15.9549	15.7345	16.2121	16.1745	15.6153	15.2768	16.1942	15.7406	15.7168
TG(54:2)	Positive	1.33e-05	-0.24662	-1	18.5401	18.7867	18.5778	18.7075	18.591	18.8484	18.6029	18.9686	18.4853	18.5393	18.8272	19.0265	18.38	18.5034	18.9304	19.2762	18.2494	18.5382	18.1473	18.7378	18.6519	18.9292	18.1559	18.52	19.1501	19.1495	19.0387	18.8426	18.944	19.322	17.8487	18.8085	17.9256	17.8862	18.3459	18.5615	19.1487	19.0586	18.3008	18.9186	18.4999	18.5911
TG(54:4)	Positive	0.000414807	-0.10735	-1	16.8297	16.937	16.2746	16.5088	16.4913	16.593	16.9672	17.1275	17.1975	17.513	16.9076	16.8228	16.3024	16.2061	16.3092	16.4505	17.2927	16.9334	16.4568	16.9828	16.7094	16.4962	17.3196	17.1494	16.8303	16.663	16.8036	17.0346	17.1996	17.4084	16.7398	16.9122	18.1675	18.2342	16.4584	16.5464	17.236	17.7368	16.4049	17.0427	16.5256	16.3791
TG(54:5)_A	Positive	5.72e-05	-0.13396	-1	16.8452	16.9792	17.0454	17.0072	16.6122	16.5645	16.7379	17.1148	16.7825	16.8909	16.1157	16.3939	16.7008	16.7391	16.322	16.4288	17.2765	17.3149	16.457	16.9823	17.0028	16.8378	17.1486	16.7321	17.1858	17.3322	17.0125	17.0455	17.2555	17.3831	16.5501	16.8715	17.4123	17.6692	16.4525	16.6457	17.1196	17.4069	16.9057	17.4745	16.8094	16.7493
TG(54:5)_B	Positive	0.000852065	-0.26631	-1	18.0482	18.3145	18.4025	18.4649	18.3427	18.5967	18.2324	18.3985	18.5887	18.9414	17.3916	17.5903	17.0251	17.0734	18.189	18.6275	18.5719	19.1025	17.5088	18.0007	17.7232	17.7757	18.6806	18.7985	18.7405	18.7018	19.0343	19.1182	18.1912	18.6169	17.4008	17.9098	18.1282	18.2693	18.682	19.0634	17.3351	17.6591	17.6724	18.282	17.1225	17.2987
TG(54:6)	Positive	9.85e-06	-0.25078	-1	17.5057	17.7565	17.708	17.743	17.1595	17.5234	17.9069	18.199	17.9279	18.2437	16.9689	16.8381	16.7772	17.1334	17.7738	18.0628	17.3739	17.7588	16.7516	17.3624	17.6713	17.494	18.5428	18.7181	17.9191	17.9296	18.8861	18.9737	17.9276	18.168	16.5183	17.0861	17.5843	17.8406	18.1441	18.4275	16.8008	17.0156	17.2447	17.916	16.5275	16.696
TG(55:2)	Positive	9.85e-06	-0.25588	-1	19.5219	19.7778	19.8038	19.9525	19.2762	19.4888	19.49	19.8271	18.7817	19.1043	19.3478	19.4267	19.0625	19.2762	18.6741	19.0727	19.2034	19.4847	18.6274	19.205	19.5888	19.7123	19.5702	19.5652	20.3023	20.2048	19.9669	20.2375	19.7208	20.193	20.1718	20.1795	20.5676	20.8043	19.3896	19.6745	19.6583	20.0052	19.8602	20.5765	19.3758	19.566
TG(56:7)_A	Positive	0.00755437	-0.79674	-1	18.955	19.7517	19.181	19.8812	18.8154	19.7261	19.358	20.9094	18.7093	19.2762	18.0568	19.1727	19.617	20.1391	18.7702	19.8789	18.0242	18.3449	17.839	19.4283	18.7672	19.1073	18.2093	18.7302	19.9474	20.131	19.2762	19.7624	19.206	19.4971	18.898	19.7137	19.8465	20.4013	18.541	19.4716	19.0156	20.6242	19.8102	20.9305	19.2118	19.9088
TG(56:8)_B	Positive	0.000852065	-0.04482	-1	14.3305	14.3753	13.1459	13.2807	13.9461	14.516	13.9398	14.3075	18.0307	18.3468	13.3855	13.7994	13.8933	14.5438	17.7959	18.8285	14.2462	14.4586	13.3442	14.4517	14.8919	15.0931	15.5372	16.1691	12.0666	12.6362	18.4677	18.018	11.6397	12.5443	NA	11.2301	14.6758	15.0889	13.8372	14.596	13.6462	14.1147	11.4587	11.8681	NA	9.61446
TG(58:12)	Positive	0.0038896	-0.25736	-1	18.5258	18.7832	18.7757	19.0066	18.2116	18.3584	17.8678	18.3485	18.486	18.8608	18.6258	18.8174	18.2914	18.5632	17.7481	18.0584	19.3349	19.0637	18.4921	19.0072	19.0909	19.3461	18.384	18.6421	18.9518	18.8078	18.1042	18.2777	18.5458	19.0162	18.5313	18.7141	19.6234	19.9072	17.4767	17.6837	18.782	19.2762	18.6053	19.1691	18.5873	18.7389
TG(58:2)	Positive	2.49e-05	-0.30208	-1	21.3643	21.6664	21.7022	21.81	21.3519	21.4934	21.0312	21.4645	21.1078	21.3878	20.5385	20.7506	20.714	20.9232	20.8572	21.1898	21.4557	22.0498	20.9148	21.5084	21.6412	21.692	21.7144	21.8687	21.8197	21.9097	21.3749	21.5668	21.1365	21.5869	21.7813	21.7621	22.6266	22.8423	21.3378	21.738	21.4213	21.9672	21.4376	22.2908	21.3213	21.5253
TG(58:6)	Positive	0.000183172	-0.30144	-1	20.8873	21.1888	21.5579	21.6381	20.414	20.5759	21.8839	22.1249	19.9521	20.405	20.3287	20.5137	20.8977	21.2614	19.2897	19.7411	20.4331	20.9348	20.6659	21.072	21.4914	21.7016	20.6022	20.7338	21.7884	21.7558	20.1212	20.4394	21.521	21.962	21.4568	21.6636	22.0558	22.2867	21.0971	21.4458	21.5617	21.9781	20.447	21.238	20.1808	20.3034
TG(60:13)	Positive	0.000118986	-0.48232	-1	15.8249	16.3073	15.2338	15.4689	16.0529	16.5531	15.9293	16.4063	19.0763	19.1792	15.9257	16.2642	15.6191	16.1182	18.4428	19.4415	15.8947	16.7148	15.5937	16.3026	16.7211	17.2838	16.6329	17.6272	14.3169	15.1228	20.0372	19.4202	14.2165	14.9083	12.1882	13.6677	16.0305	16.3912	16.289	17.0135	15.472	15.5774	14.1581	14.428	12.6678	12.2563
carnitine(10:1)	Positive	0.606507	-0.11863	0	13.3997	13.5183	14.0808	13.274	13.3925	13.3266	13.0686	13.1264	12.8112	12.6022	14.222	14.0114	14.2058	14.5541	12.1102	13.4681	14.3053	14.2737	12.572	13.4216	12.965	12.6973	11.9339	12.6928	13.7002	14.3793	13.4281	12.8705	13.4415	14.6735	14.2547	13.2739	13.7117	12.6528	13.4171	13.9812	13.2407	13.0617	14.2139	14.933	12.9181	13.0918
carnitine(12:0)	Positive	0.024024	-0.27906	0	12.8767	13.1557	14.304	13.1681	12.0678	13.035	12.9929	13.557	12.4345	12.6828	13.2541	13.416	12.2054	12.4395	12.6712	12.9867	14.1238	14.1379	12.2502	13.228	12.7152	12.8806	11.2693	12.1646	12.8494	13.5393	13.3169	13.396	13.3453	13.8857	13.3661	13.4128	12.9206	12.0539	13.2777	13.4127	11.6106	12.7207	13.3503	14.0526	13.2083	12.945
carnitine(12:1)	Positive	0.0172927	-0.35812	0	12.6475	13.0057	14.6306	13.5976	12.2784	12.6813	12.852	13.3398	12.1268	12.2777	12.9724	13.2568	11.9678	12.2354	11.7235	12.6273	14.7587	14.3435	11.768	12.193	12.0778	12.6524	10.8903	11.4663	12.4312	13.0412	12.4688	12.905	13.1697	14.1571	14.0226	14.0006	13.232	12.3997	12.6568	13.1318	11.6043	13.0375	12.8258	13.6693	12.4932	13.1
carnitine(14:1)	Positive	0.0296458	-0.27593	0	13.4177	13.6937	15.05	14.9555	13.0634	13.2471	13.4005	13.6933	12.8302	13.1669	13.9751	13.6953	12.2749	12.3512	13.1302	13.3332	15.1371	14.6822	12.9995	13.9602	13.0517	13.5812	11.8008	11.9147	13.6181	13.7868	13.7202	13.6086	13.2576	13.7039	14.2828	14.9215	13.7481	13.1051	13.1576	13.6931	12.16	13.7575	13.7284	14.7406	13.9683	13.9753
carnitine(16:0)	Positive	0.056931	-0.21032	0	15.7473	15.9576	16.6654	16.3881	14.9822	15.4018	15.7754	16.4866	15.1581	15.0977	16.0071	15.8885	14.9448	15.0663	15.4654	15.616	16.1877	15.4987	15.2223	16.0423	15.4636	15.8808	15.0792	15.8472	16.7336	16.4486	15.7574	16.0398	15.5649	16.1624	16.6878	16.5822	15.6857	15.4855	16.3078	16.0758	15.2146	16.2192	16.2615	16.838	15.7821	16.0875
Cer(d18:0_24:0)	Positive	0.0476203	0.49009	0	20.0521	19.562	20.6328	20.1859	20.8886	20.1011	18.7863	18.1441	19.2151	18.8569	21.2559	21.0807	19.9825	19.5925	21.0841	19.7132	20.4616	20.2813	20.7536	20.4135	19.9863	19.7363	19.3541	19.2884	20.3629	19.7013	19.2122	17.5589	19.7122	19.7112	20.5453	20.5546	18.5024	17.9425	19.9518	19.4168	19.5321	18.548	20.2742	20.0568	20.5488	20.3569
DG(16:0_18:1_0:0)	Positive	0.0672796	-0.20421	0	20.4373	20.6415	20.3476	20.2886	20.0493	20.3502	20.5635	21.1756	20.1251	20.236	19.4381	19.7533	20.5598	20.8595	19.5344	20.4467	19.8965	19.4095	20.1823	20.832	20.5005	20.5722	20.4107	20.893	20.9535	20.6871	20.1228	19.9782	20.5947	20.8079	20.844	20.7024	20.9729	21.2724	20.6288	21.0858	20.8885	21.1538	21.2421	21.5457	20.8899	20.7793
DG(18:0_18:1_0:0)	Positive	0.0172927	-0.27074	0	18.4367	18.7075	18.4519	18.4191	17.9232	18.301	19.0016	19.2682	17.4989	18.1783	17.6959	17.8301	19.1229	19.4489	17.6346	18.1648	17.3781	17.4048	18.2548	18.884	18.5942	18.6388	18.3402	18.5007	19.0556	19.0526	17.9349	18.0589	18.2128	18.6022	19.2384	19.2652	19.2645	19.4278	18.5005	18.8266	18.6533	19.0148	19.1553	19.655	18.823	19.2075
PC(0:0_14:0)	Positive	0.0362846	-0.10858	0	20.0951	20.2036	19.0372	19.2159	19.4551	19.8356	20.5522	20.5997	19.8011	19.9645	19.7081	19.76	20.6052	20.8828	20.4387	20.3568	19.5495	18.8123	19.0897	19.729	18.9858	18.8433	19.5394	19.5905	19.9161	19.6627	20.4498	20.7626	20.506	20.6051	20.3911	20.4774	21.4175	21.4883	19.9407	20.1633	21.211	21.4118	20.9748	21.6104	20.3324	20.301
PC(0:0_16:0)_A	Positive	0.0172927	-0.18425	0	18.7474	18.9316	17.8513	18.1539	17.8128	18.0777	19.5245	19.8931	18.6456	18.9485	18.4142	18.6275	18.9029	19.4064	18.497	18.586	18.0397	17.0911	18.5238	18.8816	18.7321	18.6953	18.7587	18.85	17.7751	18.1791	19.0762	19.3943	19.0484	19.4111	18.468	18.4767	20.798	21.0088	19.058	19.2492	19.8839	20.2489	18.9009	19.2827	18.236	18.1702
PC(14:0_16:0)	Positive	0.81236	-0.16934	0	22.1653	22.3347	22.4323	22.6002	22.0925	22.1368	22.2586	22.499	22.0307	22.2139	21.7286	21.7779	21.8287	22.0123	21.9104	22.2189	22.6511	23.0538	21.4622	21.8085	21.9913	22.05	21.8051	21.7425	22.5357	22.4875	22.2229	22.3744	22.491	22.687	22.3088	22.3285	22.6404	22.7495	22.3175	22.456	22.2729	22.5959	22.2784	22.7797	22.0479	22.1216
PC(14:0_18:2)	Positive	0.0438527	-0.18269	0	22.1351	22.3178	21.6676	21.7986	22.0864	22.1106	22.9803	23.3435	22.9221	23.1864	22.6103	22.7033	21.2239	21.5305	22.3167	22.3991	22.5547	22.2039	21.5199	21.7824	21.9305	21.9538	21.8364	21.9823	21.0532	21.1217	21.8927	22.275	22.3699	22.7046	22.3493	22.4462	23.167	23.4384	22.7362	22.9438	22.3793	22.6169	21.2402	21.7712	21.8661	22.044
PC(14:0_18:3)	Positive	0.440124	-0.21154	0	19.9116	20.1231	19.7003	19.9877	19.7669	19.8824	20.2768	20.5042	19.9109	20.182	20.046	20.1108	19.0371	19.2775	19.3143	19.6867	20.3017	20.3525	19.8071	20.2444	20.1398	20.2159	19.7623	19.7268	20.1969	20.1501	19.5346	19.7706	20.3388	20.7038	20.0887	20.1645	20.8755	20.9515	19.6789	19.9754	19.938	20.2613	19.5958	20.2651	19.9211	20.0491
PC(14:0_20:5)	Positive	0.0123796	-0.26948	0	25.4216	25.6911	25.5411	25.7686	25.4409	25.5093	25.5014	25.7942	25.513	25.6603	25.3505	25.563	24.896	25.1951	25.197	25.627	25.7378	26.1167	25.2028	25.603	25.4517	25.6805	24.9755	25.1818	25.9147	25.8933	25.1748	25.3879	25.5173	25.8463	25.5627	25.5635	25.9992	26.2071	25.505	25.7787	25.4285	25.8915	25.2034	25.8953	25.3196	25.6594
PC(14:0_22:6)	Positive	0.0672796	-0.16349	0	20.5518	20.7153	20.0433	20.0117	20.4281	20.6646	21.357	21.5977	20.4705	20.7737	19.927	19.9622	20.6808	20.9259	20.5908	20.7317	20.5914	20.8792	19.7088	20.1726	19.562	19.4207	20.0593	20.0206	20.7487	20.8826	20.8719	21.116	20.6252	20.8206	20.8342	20.9837	21.5894	21.7473	20.4678	20.3681	21.0142	21.2988	20.8324	21.4129	20.6328	20.5147
PC(16:0_16:0)_A	Positive	0.119243	-0.23344	0	21.2097	21.4432	21.3555	21.3423	20.9063	21.1428	22.223	22.5201	20.9915	21.2831	21.3943	21.5996	21.6757	21.888	20.0721	20.3585	20.743	20.6847	20.802	21.2124	21.9364	21.9436	20.7353	20.9288	21.1122	20.9809	20.6176	20.6923	21.3589	21.7625	21.3281	21.8557	21.7638	22.0227	21.7888	22.1637	21.594	21.8796	20.4539	21.0766	21.3426	21.5258
PC(16:0_17:0)_B	Positive	0.0193074	-0.44619	0	18.4052	18.8514	18.4923	18.7905	17.976	18.4493	19.229	20.375	18.674	19.3397	17.9607	18.5034	17.9443	18.6474	17.9547	18.6751	18.4482	17.5758	17.777	18.5722	18.8379	18.9917	18.1044	18.4087	18.3031	18.2643	17.6925	18.2993	18.3414	18.7604	18.8897	19.1058	19.7977	20.1151	18.5626	19.1446	18.3893	19.4053	18.3224	18.9923	18.4068	18.6121
PC(16:0_18:3)_B	Positive	0.00589945	-0.17743	0	21.1783	21.3557	21.0812	21.1643	21.3373	21.343	21.0044	21.2552	20.6146	20.7569	20.84	20.996	21.3718	21.6024	20.5176	20.7976	21.1718	21.2574	20.6978	21.0868	20.9324	20.8967	20.6849	20.6126	22.0132	22.0708	21.3062	21.3319	21.348	21.7448	21.4493	21.661	21.6851	21.8675	20.7378	20.9251	21.4659	21.8674	21.9785	22.4315	21.3283	21.4459
PC(16:0_20:4)_A	Positive	0.00666771	-0.27831	0	18.1746	18.4529	18.0027	17.9982	18.6777	18.9805	18.0931	18.5719	18.5477	18.943	18.0968	18.1473	17.4746	17.717	18.8407	19.0417	18.495	18.7633	18.2312	18.7908	18.0604	18.196	19.3824	19.5869	18.2503	18.2562	18.5398	18.7102	17.91	18.2261	16.9581	17.6517	19.0553	19.1919	18.0238	18.2522	17.5944	17.935	18.1375	18.6792	17.1209	17.4194
PC(16:1_20:5)	Positive	0.00666771	-0.23537	0	20.7632	20.9985	21.366	21.4539	20.6431	20.8432	20.6425	20.815	20.2917	20.5787	20.4668	20.5862	21.642	21.9359	20.3988	20.5275	21.4184	21.3374	20.4535	20.9909	20.8659	21.0328	20.1176	20.091	20.7415	20.7669	19.9318	20.0926	20.6747	21.0564	20.9304	21.3245	20.9269	21.2638	20.6484	20.9192	21.3533	21.6344	20.1678	20.8831	21.5825	21.8374
PC(17:1_0:0)	Positive	0.0123796	-0.22406	0	17.5013	17.7254	17.9988	18.0762	16.913	17.2299	18.1044	18.4694	17.3537	17.6014	16.6309	16.7928	18.3645	18.5266	16.9524	17.0746	16.7794	16.3719	17.4761	18.0302	18.6329	18.6721	16.8442	16.8748	17.4659	17.2387	17.4252	17.702	17.6245	17.9756	16.7665	17.3675	18.8294	19.093	17.411	17.8795	18.5221	18.7231	16.9881	17.6433	16.9437	17.1653
PC(18:2_18:2)	Positive	0.81236	-0.13795	0	21.2657	21.4036	21.1795	21.2595	20.7299	20.7546	21.3741	21.6208	20.7687	20.8854	20.4747	20.5719	21.2103	21.474	21.0202	21.2671	20.7	20.8662	20.1925	20.5701	21.6568	21.5253	21.1219	21.0328	22.1221	22.0186	21.955	21.9676	21.6227	21.9466	21.4755	21.6133	21.7804	21.8428	21.2827	21.345	21.3812	21.7073	21.7715	22.2444	21.4938	21.5591
PC(18:2_18:3)	Positive	0.338939	-0.25883	0	21.9401	22.1989	22.216	22.3494	21.1032	21.3483	21.9734	22.2569	21.5831	21.8635	21.5327	21.6007	21.9841	22.1837	21.1598	21.4156	21.4302	21.9201	21.4642	22.0027	22.8055	22.8178	22.0208	22.1167	22.4805	22.518	22.4557	22.615	22.3208	22.6768	21.9549	22.241	22.5621	22.7573	22.3564	22.5548	21.7965	22.2992	21.6349	22.2319	21.9674	22.2095
PC(18:2_19:0)	Positive	0.0110407	-0.24048	0	18.6115	18.852	18.1469	18.3738	18.2268	18.6202	18.5817	18.7241	19.2778	19.6906	17.9238	18.0853	17.5725	17.7836	19.3036	19.7789	18.7114	19.3192	18.2374	18.6867	18.7251	18.6231	19.9268	19.9424	18.9525	18.8189	19.5769	19.6734	18.7645	18.9683	17.8551	17.9265	19.1005	19.2559	19.2648	19.4778	17.9391	18.3494	18.2989	18.9767	17.8435	17.9645
PC(18:2_20:4)	Positive	0.0476203	-0.19983	0	20.2455	20.4453	20.6643	20.7892	19.4272	19.6543	20.3252	20.7476	19.8613	20.0187	19.8808	20.0144	20.3999	20.4905	18.9696	19.3681	19.4982	19.8983	19.7449	20.1238	21.344	21.2692	20.533	20.5686	20.8741	20.7907	21.3538	21.3685	20.9424	21.2577	20.0459	20.4318	20.5453	20.7582	20.609	20.776	20.071	20.1722	19.6764	20.2326	20.1431	20.1756
PC(18:2_20:5)	Positive	0.197167	-0.15966	0	20.9503	21.1099	20.9931	20.9145	20.8871	21.0065	20.7262	21.1433	20.4951	20.8018	20.3144	20.3128	20.4897	20.5173	20.1879	20.4429	20.6894	20.7034	20.4639	20.8702	20.7352	20.8097	20.6526	20.7969	21.3422	21.2494	21.3409	21.4615	20.8337	21.3608	21.5986	21.4771	22.1298	22.0927	20.7995	20.9112	21.5858	21.8705	21.7354	22.2951	21.005	21.1614
PC(20:3_20:4)_B	Positive	0.0139184	-0.25703	0	17.6283	17.8853	17.8226	18.0163	17.2974	17.5996	17.7857	18.2164	17.1566	17.4133	16.8944	17.0391	17.4169	17.6327	16.8723	17.3013	17.3235	17.6448	16.637	17.1582	17.4205	17.3094	16.9855	17.2009	18.0267	18.1747	17.9656	18.4267	17.9951	18.3864	18.5458	18.5308	18.5422	18.6887	17.701	17.8145	18.0432	18.4628	18.5914	19.1109	17.5423	17.5786
PC(O-16:1_0:0)	Positive	0.00515144	1.02863	0	19.1637	18.1351	19.2762	18.0285	19.6458	18.8603	18.7582	17.8924	19.0105	18.229	20.7039	20.3302	17.0435	16.1026	19.381	17.7609	19.0733	18.1537	20.2916	19.1522	17.7708	17.7196	20.0163	18.8366	18.4246	17.6785	18.5421	16.6893	19.9937	18.7939	19.6811	19.2761	18.0213	16.631	19.7114	18.2915	18.7807	16.4987	18.9684	18.1589	20.1795	19.6172
TG(48:0)	Positive	0.0672796	-0.31076	0	17.36	17.6708	16.9499	17.1474	17.6117	18.0487	17.6012	17.9752	17.9061	18.3481	17.0124	17.3257	16.582	16.8261	17.9893	18.3352	17.3997	17.0699	17.3318	17.9553	16.5125	16.3672	18.347	18.3979	16.8795	16.8528	18.1788	18.4599	17.506	17.9484	16.8565	16.999	18.6446	19.1296	16.5645	17.3282	17.2781	17.8559	17.499	18.1575	16.55	16.8875
TG(50:0)	Positive	0.321711	-0.21365	0	17.1282	17.3419	16.7256	16.9497	16.5342	16.859	16.983	17.4184	18.2752	18.5542	16.5673	16.5547	16.7495	16.9939	18.4938	18.7311	17.3327	16.9238	17.1967	17.8465	17.2754	17.1383	18.5128	18.5582	16.6825	16.3759	18.4887	18.7398	16.4673	16.9753	15.8217	16.1905	18.6729	18.8583	16.1368	16.6388	17.5514	17.9469	16.0646	16.6191	16.0332	15.9655
TG(52:0)	Positive	0.81236	-0.20939	0	18.5528	18.7622	18.9644	18.8773	18.3254	18.5427	18.104	18.574	17.9548	18.3213	18.2007	18.302	18.0399	18.1901	17.392	17.6871	18.1404	18.4694	17.6209	18.2591	18.4379	18.3917	18.6692	18.8103	19.3932	19.4059	19.1484	19.2066	18.469	18.8895	19.4103	19.2818	19.7972	19.8686	18.1414	18.3962	18.7314	19.2875	19.1665	19.6606	18.9501	18.8231
TG(52:1)	Positive	9.85e-06	-0.21867	0	21.3457	21.5643	21.4294	21.4297	21.0791	21.2141	21.7058	21.9958	20.58	20.9752	21.0008	21.215	21.0705	21.4	20.7932	21.249	20.9251	21.1159	20.2649	20.7421	21.2409	21.2093	20.7602	20.7603	21.511	21.5206	21.9135	22.1069	21.7158	22.1312	22.0958	22.1206	22.2999	22.3618	21.6886	21.8405	21.5476	21.92	22.1699	22.7138	21.1217	21.2651
TG(56:5)	Positive	0.0156114	0.92156	0	14.3299	13.4083	14.0698	13.0774	15.2719	14.4867	12.9083	12.7074	14.8116	14.0677	15.1217	14.6976	14.3242	12.6722	14.8079	13.4141	13.894	12.8405	16.76	15.4945	13.5385	13.0296	14.9469	13.9314	14.1998	14.006	15.1921	14.0475	13.1825	12.0131	12.8775	13.0994	12.3574	11.0201	14.0296	13.5559	14.2777	11.9706	15.9408	14.6959	14.0849	13.3382
TG(56:7)_B	Positive	0.056931	-0.15308	0	15.2631	15.4162	15.3977	15.3864	15.0435	15.1422	15.2495	15.6339	15.1007	15.6122	14.0349	14.0978	16.9434	17.0529	15.593	15.7429	14.6036	14.5042	14.6387	15.0167	15.0504	15.1125	14.1776	14.3418	15.5921	15.5972	15.5328	15.3779	15.2969	15.3177	15.5152	15.819	15.8704	16.0737	14.1623	14.5726	16.4211	16.3503	15.7013	16.0605	15.3372	15.5113
TG(56:8)_A	Positive	0.68325	0.01427	0	16.429	16.4147	16.78	15.9245	16.3054	17.7325	17.3475	17.0469	16.6856	16.5747	13.7154	14.2784	16.1067	16.5584	15.1637	16.1735	16.7162	15.8936	17.0727	17.6601	16.5868	15.947	15.8834	17.0154	17.3299	16.7752	16.9562	15.9228	16.0868	16.1472	16.7443	16.8644	17.3189	16.104	16.148	16.7007	16.902	15.3595	17.9816	16.7778	14.7481	16.837
TG(58:10)	Positive	0.0797138	-0.58356	0	18.1027	18.6862	18.6155	18.978	17.4874	18.2856	18.6865	19.6766	18.0257	18.5348	17.2391	18.2805	17.9495	18.4512	17.8244	18.6595	17.928	18.0052	17.7909	19.0368	18.5544	18.7755	17.6464	18.1044	19.0017	19.0049	17.9064	18.2616	17.989	18.4213	18.1928	18.307	18.6113	19.2762	17.604	18.4412	18.3171	19.3981	18.587	19.2892	18.096	18.537
TG(58:11)	Positive	0.0438527	-0.21447	0	19.7252	19.9397	19.8157	20.0061	19.4372	19.5994	19.6944	20.0478	19.7115	20.0734	19.4266	19.5556	19.6204	19.9617	19.4343	19.72	20.2274	20.2173	19.2762	19.6522	20.0401	19.9455	18.7373	18.778	19.8967	19.8942	19.2947	19.5881	19.7537	20.1286	20.3257	20.4405	20.6345	20.9149	19.4088	19.6079	19.9872	20.317	19.8438	20.3018	19.9376	20.0433
TG(58:7)	Positive	0.00666771	1.6128	0	18.3267	16.7139	18.2426	15.8873	18.5959	17.3552	17.1174	15.5117	17.5163	16.2321	18.9133	18.1023	19.7874	18.0791	19.1424	16.6135	17.8262	16.4201	19.369	18.0674	17.515	17.0429	18.5958	17.2806	17.4651	16.4279	17.2323	14.4216	18.0477	16.3217	18.5321	17.6918	17.3823	15.4828	18.3284	16.3465	18.4596	15.8086	19.8554	18.1592	18.6106	17.0266
TG(58:8)	Positive	0.0476203	1.1302	0	18.7404	17.6102	18.9919	17.7392	18.8905	17.736	17.3552	16.8312	18.0916	17.2039	19.1872	18.5442	20.0881	19.014	19.2762	17.4447	18.5335	17.4091	19.8222	18.9787	18.7135	18.1012	18.5487	17.6594	18.0983	17.2476	17.6076	16.093	18.0935	16.737	19.3358	18.7232	18.2249	16.5274	18.673	17.2401	18.8002	16.6516	19.6446	18.49	18.8322	17.8333
TG(58:9)	Positive	0.209845	0.02918	0	19.8065	19.7773	20.115	20.0094	19.5329	19.6368	19.4267	19.5808	20.2327	20.0161	19.9613	19.964	20.8317	20.8051	20.5451	20.6457	19.0699	19.3743	20.3555	20.4437	20.4926	20.5134	19.6824	19.6352	19.0562	19.3202	20.9282	20.3832	18.7319	18.6757	18.949	19.4692	19.6328	19.6996	19.7644	19.6041	19.8821	19.3613	20.076	19.7199	18.864	18.6892
CE(20:3)	Positive	0.000221217	0.23177	1	18.4991	18.2673	19.0355	18.8835	19.5317	18.848	17.7336	17.3733	18.7608	18.0243	20.1833	20.5439	17.1664	17.0171	19.7156	18.5029	18.698	18.7031	19.5469	19.2343	17.8728	18.0245	18.3245	18.2876	18.2271	17.9911	18.0433	16.6787	18.3251	18.5085	18.9579	18.9283	16.305	16.8383	18.9881	18.6688	17.6555	17.1048	17.8529	17.9932	19.0577	19.1923
CE(20:4)	Positive	1.33e-05	0.31475	1	18.2424	17.9277	18.3551	18.1015	19.2257	18.5644	17.3246	16.6362	18.0857	17.5841	19.681	20.1074	17.9199	17.5622	19.6392	18.0578	18.0707	18.2055	18.6252	18.4441	17.6107	17.734	18.2367	17.9365	18.0713	17.7914	17.583	16.1756	18.0229	18.1534	18.8782	19.0081	16.5316	16.1057	18.5612	18.2844	17.5598	16.8947	18.2478	18.3658	18.6178	18.8403
CE(20:5)	Positive	9.85e-06	0.26729	1	16.7091	16.4418	16.5452	17.0282	17.7961	17.1287	16.2062	15.8393	16.6146	16.4425	18.8055	18.9625	15.298	15.3444	17.4615	16.3352	16.7793	16.3508	17.9117	17.5763	15.8949	16.2034	17.043	16.7651	16.2431	15.8953	16.2427	15.1071	16.3263	16.3443	16.6566	16.9623	15.1644	14.438	17.5177	17.1784	15.977	15.3642	16.4134	16.3185	17.2849	17.2518
CE(22:6)	Positive	9.85e-06	0.40772	1	19.4557	19.048	20.6131	20.2406	20.2348	19.6558	18.3246	17.9631	19.1814	18.6956	20.784	20.7956	18.1912	18.2273	20.3623	19.0751	20.2484	20.0486	20.913	20.388	19.8626	19.5604	18.8186	18.6703	19.3798	18.9166	18.5313	17.0827	19.1805	19.1198	19.6982	19.7269	17.7297	17.5534	19.418	18.8603	18.6121	17.7854	18.8125	18.7244	20.2185	19.87
PC(17:0_0:0)	Positive	0.000601504	0.03146	1	22.1839	22.1524	21.8643	21.7531	22.4519	22.4339	21.7792	21.9907	21.7284	21.8721	20.4617	20.3774	23.7624	23.8217	21.4293	21.5274	21.9432	21.1169	21.6534	21.8332	21.9052	21.4371	20.7737	20.3629	23.3738	23.2492	22.3837	22.2714	22.175	22.3817	22.8358	22.8355	22.5716	22.5821	21.3594	21.4119	23.2139	23.3676	23.3746	23.7395	22.6378	22.6835
PC(17:0_18:1)_A	Positive	0.000221217	0.08629	1	16.8472	16.7609	16.2376	16.3368	16.858	16.6105	16.5084	16.6844	16.5227	16.485	14.1903	14.5733	20.305	20.2164	15.9444	15.9662	16.4395	15.3099	16.0583	16.5185	16.2753	15.8578	15.3472	15.1546	17.6375	17.5393	16.7913	16.5247	16.9178	16.8216	17.2555	17.4942	17.6853	17.6142	15.9283	15.8185	18.1645	17.847	18.5964	19.1022	17.2805	16.7433
PC(22:6_0:0)	Positive	9.85e-06	1.77666	1	19.9537	18.1771	18.7584	16.7696	20.4146	19.0828	19.9711	18.3814	20.0585	18.8304	21.3398	20.6654	18.7225	16.9591	21.4289	19.2362	19.3179	16.9255	21.0865	19.2428	18.2741	17.2198	21.3812	19.8754	18.6295	17.1727	18.9821	16.1198	20.8141	18.8713	20.0034	19.025	18.6798	16.1823	20.9714	18.8458	19.6319	16.3631	20.053	18.4964	20.5555	19.2762
PC(O-16:0_0:0);PC(O-8:0_O-8:0)	Positive	0.000720665	2.16184	1	19.1862	17.0244	18.0456	15.7652	19.6473	17.7268	18.8898	17.111	18.9357	17.5173	20.2781	19.2762	19.3279	17.0548	20.7813	18.0522	18.3662	15.4237	20.3841	18.2979	17.4247	16.3337	20.6151	18.7531	18.0794	16.2063	17.9905	14.6684	19.7923	17.5085	19.1266	18.0447	17.6357	14.7976	19.5946	17.1013	19.2453	15.1915	20.0416	17.7482	19.5231	17.9093
PC(O-16:0_18:1)	Positive	4.25e-05	0.26993	1	18.4066	18.1367	17.8636	17.5645	18.7023	18.8605	19.2095	18.875	19.019	18.5407	16.866	17.9717	17.4252	16.7666	17.6569	18.3704	17.9601	17.5995	18.3677	18.3626	17.4098	17.0092	18.9285	18.9356	18.9361	18.4368	18.7691	17.333	18.8051	18.7091	19.1763	18.9223	18.0616	16.7146	19.3819	19.2733	18.7013	17.2379	18.9267	18.4961	17.9659	18.7549
PC(O-16:0_18:2)	Positive	4.25e-05	1.0403	1	21.5235	20.4832	20.9834	19.7215	21.8427	21.3264	21.3219	20.4276	21.5562	20.8175	22.5949	22.6217	20.1476	19.2088	21.9624	20.6249	21.3036	20.0438	22.3039	21.2264	20.2352	19.7689	22.2632	21.354	20.6124	19.7581	21.0207	18.8594	22.0678	20.8988	22.0885	21.2326	20.6937	19.1074	22.6365	21.358	21.3234	19.2813	21.2409	20.4153	22.271	21.6114
PC(O-16:0_20:3)	Positive	2.49e-05	1.3068	1	21.3902	20.0834	21.0054	19.3951	21.8332	20.9389	20.8897	19.7032	21.3457	20.4097	22.4092	22.0799	20.7144	19.4368	21.8524	20.1659	21.3457	19.585	22.3518	21.1047	20.4147	19.5044	22.0152	20.8938	20.3572	19.4097	20.3318	18.0121	21.8591	20.3738	21.8274	21.1753	20.5092	18.5294	22.0628	20.4018	21.2476	18.9522	21.5243	20.5424	21.9066	21.0531
PC(O-16:0_20:4)	Positive	1.75e-05	1.82123	1	20.2586	18.4374	20.0823	17.7679	20.6107	19.1313	19.5011	17.713	19.7636	18.5227	21.2085	20.4099	20.7431	18.6342	21.3102	18.715	19.862	17.744	21.3976	19.7348	19.3554	18.1458	20.7379	19.398	19.1166	17.794	18.8561	16.0626	20.5165	18.6812	20.5003	19.6508	19.1645	16.7345	20.5315	18.2713	20.2875	17.1064	20.9499	19.128	20.6766	19.4018
PC(O-16:0_22:4)	Positive	2.49e-05	1.81053	1	17.7927	15.9821	17.1944	15.7183	17.9735	16.3371	16.9455	15.7524	17.1444	16.0407	18.4024	17.3573	19.915	17.4454	19.251	16.0137	16.7886	15.2319	18.9181	17.4071	16.4545	15.4761	18.5245	16.7375	16.7779	15.1311	16.3975	14.691	17.8928	15.6119	17.8688	16.7876	16.3831	14.2858	17.7463	15.6507	18.0241	14.5037	19.3856	17.216	17.8654	16.2474
PC(O-18:0_0:0)	Positive	0.0038896	1.13384	1	18.8462	17.7124	18.9173	17.3903	19.3274	18.3726	18.0421	17.207	18.3666	17.8299	20.1577	19.6895	17.6553	16.6076	18.8808	17.1022	18.9223	17.8968	19.771	18.5797	17.9704	17.5927	19.3648	18.1925	18.1464	17.3545	17.8608	16.1824	19.6295	18.1322	19.3335	19.0217	17.9187	16.3817	19.233	17.5385	18.7389	16.385	19.0146	17.9726	19.6729	18.8177
PC(O-18:0_18:2)	Positive	0.00014773	0.19813	1	18.5741	18.376	18.8146	18.0268	18.8515	19.5261	19.4081	19.0597	19.1839	18.9371	16.2256	17.2216	17.9172	17.1702	17.5917	18.5357	18.6779	17.7541	18.9648	19.2762	18.3761	17.7577	18.5585	19.3388	18.9424	18.2377	18.8189	17.7325	18.7288	18.6508	19.1999	19.1145	18.2406	17.0378	18.9886	19.1036	19.0477	17.2832	19.4862	18.5073	17.4593	19.2483
PC(O-18:0_20:3)	Positive	0.000221217	0.49034	1	22.3718	21.8815	22.1336	21.9466	22.9466	22.6541	22.147	21.7035	22.3356	21.9272	23.0615	23.2579	21.0114	20.4087	22.2859	21.8435	22.0824	22.1608	22.5093	22.1512	21.5338	21.1881	22.8945	22.1577	22.1416	21.8283	22.0459	20.95	22.6041	22.225	23.1099	22.675	21.6345	20.5893	23.3741	22.4515	22.2663	20.9111	22.1355	21.8884	23.1827	22.7117
PC(O-18:0_20:4)	Positive	0.000221217	0.70605	1	22.9337	22.2277	23.3054	22.3503	23.1539	22.8549	22.4005	21.8074	22.9102	22.3395	23.6619	23.7399	21.8003	21.2147	23.0346	21.9543	23.6049	22.9755	23.5754	22.9541	22.6749	22.4357	22.8806	22.2453	22.3441	21.8492	22.1628	20.6332	23.1169	22.225	23.6131	23.0298	22.3864	21.1193	23.5631	22.6094	22.5577	21.1894	22.3307	21.9124	23.5968	23.1142
PC(O-18:0_22:5)	Positive	0.00125371	0.93395	1	22.8352	21.9013	23.13	21.8571	23.2725	22.6713	21.9708	21.0951	22.3049	21.7103	23.7367	23.3834	22.4529	21.7607	22.9958	21.7533	23.1133	22.3738	23.4599	22.6762	22.3528	21.9716	22.7447	21.7671	22.3165	21.6266	21.6956	19.8142	22.9767	21.7815	23.486	23.1017	22.1882	20.7385	23.3191	21.9596	22.8487	20.8442	22.9903	22.3502	23.3489	22.7889
PC(O-18:0_22:6)	Positive	1.33e-05	0.95058	1	18.7975	17.8469	18.9232	17.9796	19.7377	18.9413	17.9972	17.3467	18.5528	17.769	20.7317	20.4578	16.7085	16.0432	18.6188	17.4199	18.83	18.0243	20.3837	19.0982	18.0502	17.6317	19.6251	18.309	17.8644	17.3737	18.2417	16.7651	19.2602	17.6953	19.0116	18.6116	17.2119	16.3264	19.2139	17.8776	18.4969	16.3063	18.6995	17.7132	19.7902	19.2476
PC(O-18:1_0:0)	Positive	0.001634	0.81168	1	20.5448	19.7332	21.1096	20.1688	20.9835	20.3489	19.7075	19.0629	20.1903	19.6389	21.6976	21.4347	19.1065	18.3003	20.5865	19.2483	21.1471	20.4413	21.7661	20.9615	20.298	20.0493	20.6304	19.7989	20.0619	19.5771	19.6267	18.1357	20.9427	20.0242	20.9001	20.6935	19.6798	18.313	20.6377	19.5151	20.1184	18.3896	20.2613	19.6454	21.4448	20.9158
PC(O-18:1_18:2)	Positive	0.00260525	0.89815	1	20.3204	19.4222	20.8073	19.5	20.8198	20.0374	19.2645	18.4355	19.4467	18.849	21.3049	20.9135	19.7849	18.9521	20.4701	18.9709	20.6084	20.1353	21.2097	20.4344	19.9044	19.5489	20.2818	19.3086	20.048	19.6075	19.2369	17.694	20.6194	19.54	20.9942	20.61	19.2241	18.027	20.2571	18.9074	20.2934	18.4185	20.6737	19.9909	21.1583	20.5639
PC(O-18:1_20:4)	Positive	4.25e-05	1.07096	1	18.5371	17.4661	18.7551	17.2331	19.0038	18.0781	17.1746	16.1779	17.3541	16.6611	19.4068	18.8505	18.8634	17.786	18.7941	17.0261	18.3443	17.8722	19.0899	18.3082	18.0694	17.4655	18.3478	17.3648	18.6232	17.8374	17.3041	15.8552	18.5938	17.2883	19.2762	18.8426	17.6267	16.0546	18.4524	16.7107	18.8988	16.7679	19.4753	18.6929	19.2881	18.4498
PC(O-20:0_20:4)	Positive	0.00138185	0.30139	1	24.0204	23.719	24.3054	24.3823	24.4687	24.2475	23.3351	22.9641	23.6061	23.379	24.3694	24.5582	23.1558	22.8016	23.8836	23.7638	24.5762	24.7882	24.4649	24.4215	24.142	23.7913	23.7563	23.4029	24.1374	24.0196	23.3718	22.4789	24.0544	23.798	24.4524	24.2128	23.5033	22.6197	24.2616	23.6555	23.9536	22.8973	23.8987	23.9418	24.7114	24.2561
PC(P-16:0_16:0)	Positive	9.42e-05	0.33669	1	24.3598	24.0231	24.5008	24.2147	24.834	24.4839	23.6977	23.2048	23.9162	23.369	24.478	24.7611	23.8461	23.9895	24.2013	23.9167	24.4804	24.9809	24.8057	24.5337	24.2375	24.0762	24.0143	23.4515	24.8805	24.38	23.616	22.767	24.293	23.8875	24.9257	24.7778	24.0428	23.1455	24.625	23.9289	24.3686	23.4826	24.597	24.5865	24.8361	24.5252
PC(P-16:0_18:2)	Positive	0.00293221	0.58342	1	23.7302	23.1467	24.0202	23.1077	24.2655	23.8698	22.7175	22.0595	22.7328	22.2051	24.4157	24.2399	23.7908	23.4737	23.9099	23.0864	23.7558	23.8663	23.8445	23.4519	23.3535	23.0675	23.2921	22.5027	23.8953	23.6118	22.8236	21.6528	23.5582	22.9128	24.5508	24.1429	23.1234	22.0821	24.0965	23.0232	23.9536	22.64	24.2824	24.0785	24.221	23.8602
PC(P-16:0_20:4)	Positive	9.85e-06	0.85827	1	21.701	20.8427	21.8209	20.723	22.226	21.1989	20.6298	20.0113	20.731	20.3189	22.3085	22.0519	22.333	21.6352	22.1176	20.5245	21.4951	20.9282	22.3682	21.8832	21.3561	20.9166	21.503	20.781	21.4213	20.8171	20.5564	19.342	21.3674	20.2002	22.3202	22.0529	20.9206	19.8054	21.9283	20.6184	21.8354	19.8976	22.7058	21.7864	22.0752	21.3615
PC(P-16:0_20:5)	Positive	0.00293221	0.91611	1	16.3449	15.4288	16.6986	15.4837	17.5867	16.6397	15.8442	15.2789	15.9607	15.033	18.173	18.1148	14.828	14.0388	15.7145	14.4461	16.1782	14.7998	18.5311	17.3423	15.3527	14.9452	17.179	15.9361	15.5798	15.1927	16.0286	14.6305	16.6947	15.3606	15.6789	15.8847	14.7542	13.6241	16.3949	15.6044	16.3617	14.4431	16.2482	15.3341	17.1106	16.4434
PC(P-16:0_22:6)	Positive	0.00014773	0.77141	1	19.4958	18.7244	20.2849	19.49	20.1949	19.5256	18.2474	17.8608	18.9086	18.2357	20.8896	20.8147	17.9487	17.612	19.5361	18.2165	20.16	19.4486	21.3384	20.3983	19.8322	19.3682	19.5996	18.4535	18.9487	18.7995	18.7536	17.473	19.4568	18.1543	19.4965	19.3986	17.743	17.1284	19.4015	18.2037	19.2762	17.2374	19.5903	18.7434	20.3083	19.925
PC(P-18:0_20:4)	Positive	0.000118986	0.74742	1	20.071	19.3236	20.6938	19.7886	20.785	20.009	18.8626	18.1186	19.2762	18.5473	20.9795	20.7378	19.7753	19.0629	20.0229	18.655	20.4525	19.9905	21.3073	20.7321	19.9373	19.5946	19.7756	19.2762	19.9686	19.5921	19.1926	18.1239	19.8809	18.951	20.3914	19.9944	18.8347	18.0419	19.9319	18.7131	20.0727	18.271	20.4447	19.8698	20.8342	20.4015
PC(P-18:0_22:6)	Positive	0.000183172	0.7211	1	19.1872	18.4661	19.7589	18.7457	19.7956	19.1658	17.7497	17.2158	18.1881	17.8227	19.8461	19.7061	19.638	18.8307	19.0847	17.9608	19.3291	18.9883	20.0113	19.2372	19.13	18.75	18.8233	18.0014	19.0128	18.8096	18.0899	17.1907	18.9935	18.0676	19.8067	19.5052	18.1485	17.0819	19.0399	17.6802	19.4166	17.7373	19.9641	19.4186	19.9169	19.4058
SM(d16:1_16:0)	Positive	0.0038896	0.82404	1	17.4148	16.5907	17.8285	16.4343	18.0704	16.9294	15.8353	15.5268	16.4068	16.24	18.0157	17.3649	18.481	17.5403	17.4702	16.1162	17.2727	16.7422	18.1977	17.5581	17.1117	16.6975	16.8805	16.4433	17.3393	16.7367	16.2364	15.3423	16.9679	16.102	18.0811	17.7334	16.5541	15.543	17.3159	15.7528	17.5093	15.6794	18.652	17.8176	18.069	17.5145
SM(d16:1_22:0)	Positive	9.85e-06	0.93632	1	18.7381	17.8018	18.6427	17.5754	20.2243	19.3256	17.8872	17.6488	18.1889	17.206	20.2912	20.1238	17.7747	16.5388	18.4023	17.3441	18.1515	17.0212	20.7134	19.2741	17.6169	16.9813	19.2762	18.0471	18.1035	17.7814	18.4702	17.3346	18.6702	17.4363	17.9051	17.925	17.9561	16.3917	19.2322	18.2308	18.7251	16.7177	19.2962	18.3022	19.2343	18.8299
SM(d16:1_24:1)	Positive	1.33e-05	0.58918	1	21.6346	21.0454	22.4239	21.8056	22.5823	21.9485	20.6818	20.2678	21.0711	20.6457	22.6881	22.6967	20.9334	20.2755	21.6168	20.6843	21.8535	21.6335	22.9904	22.2264	21.5286	21.227	21.2237	20.583	21.3775	21.0213	21.1201	19.9728	21.282	20.6167	21.5548	21.4846	20.0239	19.5655	21.8912	21.0506	21.4418	19.9264	22.0521	21.427	22.3554	21.8498
SM(d18:1_16:0)_A	Positive	0.00138185	0.3562	1	22.3038	21.9476	22.9585	22.9072	22.9413	22.5056	21.2052	20.9499	21.5351	21.1522	22.5425	22.4412	22.3042	21.8551	21.9262	21.5545	22.5184	22.8977	22.9624	22.898	22.4899	22.1824	21.7551	21.0498	22.7098	22.4804	21.7733	20.9346	21.8023	21.4324	22.6885	22.3798	21.3526	20.6476	22.3531	21.744	22.3401	21.5429	23.0746	22.8179	22.8421	22.5779
SM(d18:1_18:0);SM(d16:1_20:0)	Positive	0.000183172	0.5129	1	22.1224	21.6095	22.9585	22.0173	22.853	22.341	20.8239	20.2613	20.8038	20.2519	22.3935	22.2705	23.0182	22.7042	22.0823	21.2403	22.0273	22.3332	22.7604	22.1915	22.1043	21.8782	21.0446	20.4338	22.5168	22.337	21.1833	20.118	21.52	20.9492	22.7846	22.5978	21.2292	20.5574	21.9078	21.1497	22.3005	21.0012	23.4547	23.1069	22.6811	22.4494
SM(d18:1_22:0)	Positive	3.27e-05	0.91267	1	21.2011	20.2885	21.6489	20.49	21.81	20.712	19.6724	19.1098	20.2149	19.1409	21.5261	21.1962	23.0062	22.0854	21.512	19.6357	20.7485	20.3611	21.7681	21.2598	20.7135	20.37	20.2066	19.5198	21.1516	20.5176	19.9271	18.7837	20.3979	19.2762	21.889	21.5813	20.316	19.3572	21.0768	19.7441	21.5521	19.4685	23.1301	22.1499	21.7553	21.0104
SM(d18:1_23:0)	Positive	1.33e-05	0.84613	1	14.9865	14.1404	15.8839	14.8202	16.2347	15.182	13.7034	13.4262	14.5519	14.1441	16.1761	16.0339	13.8994	13.3196	14.7727	13.5489	15.3097	14.6371	17.1447	15.8669	15.0088	14.3921	15.0852	14.0149	14.4106	13.9739	14.7435	13.4563	14.7271	13.6574	14.3524	14.0638	12.9278	11.9897	15.0297	13.6668	14.6495	13.0118	15.3818	14.5875	15.7375	15.0147
SM(d18:2_14:0)	Positive	0.00293221	0.6708	1	15.9449	15.2741	17.351	16.4258	16.8048	16.1964	14.5985	14.0558	15.4703	14.7696	16.7643	16.8664	15.2486	14.3058	15.5752	14.3346	16.5472	16.0918	17.5012	16.7548	16.4232	16.4322	15.5497	14.7181	15.8172	15.671	15.3631	14.1025	15.706	14.6208	15.8232	15.8128	13.6615	13.7584	15.7394	14.7856	15.509	13.7585	16.5242	15.534	16.9209	16.4877
SM(d18:2_16:0)_A	Positive	9.42e-05	0.84267	1	16.6908	15.8481	17.0112	16.1962	18.1678	17.2009	15.3597	15.1837	16.8841	16.1982	17.8952	17.7627	15.8333	14.6117	16.754	15.5199	16.6647	15.9648	18.9806	17.6462	16.2888	15.6646	16.9885	15.8737	16.1032	16.0054	17.3761	15.5555	15.7637	14.8669	15.801	15.6779	14.0533	13.4529	16.832	15.8359	16.4125	14.6942	17.6721	16.6985	16.9736	16.3522
SM(d18:2_16:0)_B	Positive	3.27e-05	0.65439	1	17.971	17.3166	19.5412	18.5819	19.1956	18.3112	16.5669	16.3064	17.7846	17.2939	18.4113	18.3656	17.6069	16.8445	17.8431	16.8067	18.3847	18.0474	19.5601	18.7424	18.32	18.2377	17.5708	16.7183	17.6831	17.4572	17.8693	16.4704	17.0814	16.397	17.4298	17.3565	15.848	15.2233	17.7913	16.929	17.6518	16.1589	18.8831	18.0646	18.397	18.0193
SM(d18:2_18:0)	Positive	4.25e-05	0.55007	1	18.3991	17.849	19.2315	18.5915	19.1842	18.6054	17.1542	17.0552	17.9915	17.3309	19.2762	19.0428	18.5617	17.9853	18.4849	17.4915	18.814	18.5247	19.3054	18.7817	19.162	18.7609	17.8788	17.3519	18.0896	18.1549	17.3702	16.4248	17.7195	17.005	17.9819	17.7174	16.8699	16.2729	18.5784	17.7546	18.6769	17.2221	18.8716	18.4598	18.7792	18.4468
SM(d18:2_18:1)	Positive	3.27e-05	0.22466	1	20.4034	20.1788	20.9958	20.9066	20.9986	20.6795	19.6039	19.722	20.4521	20.1926	21.3127	21.388	19.8245	19.7441	20.253	19.908	21.0947	21.005	21.3701	20.9006	21.5756	21.1881	20.1996	19.6596	20.0812	20.3253	19.8481	18.9743	20.377	19.904	19.6676	20.0988	19.0104	19.2886	20.616	20.4228	20.8205	19.7723	20.1078	19.834	19.8598	19.6615
SM(d18:2_20:0)	Positive	3.27e-05	0.2198	1	21.4542	21.2344	22.2784	21.8315	21.7061	21.4597	20.9512	21.1271	21.4294	21.2008	21.8578	21.7823	21.1162	21.045	21.9322	21.2061	21.4502	21.4593	22.2214	22.1181	22.3692	22.4706	21.4111	21.036	21.2382	21.1838	21.1156	20.5727	21.039	20.6551	21.1547	21.2833	20.7202	20.627	21.4959	21.1964	21.3955	20.6621	20.9451	20.7394	21.2563	21.0313
SM(d18:2_22:0)	Positive	9.85e-06	0.13523	1	21.262	21.1267	21.719	21.6404	21.4933	21.3382	20.7665	20.958	20.9309	20.8187	21.4742	21.5884	21.7479	21.6973	21.8421	21.1265	20.682	21.057	21.6505	21.6223	21.9205	21.9855	20.9907	20.6702	21.0979	21.0545	21.4007	20.9627	20.63	20.439	20.9289	21.2205	20.8259	20.6948	21.3753	21.2188	21.4335	20.7753	21.4443	21.092	20.8857	20.5748
SM(d19:1_18:0)	Positive	0.00138185	0.23552	1	18.1916	17.9561	19.0155	18.3158	18.7644	18.4677	17.4878	17.5282	18.3656	18.1446	18.6257	18.7135	18.3199	18.1231	19.2455	18.5843	18.0646	18.0369	18.6321	18.6386	18.8314	18.6643	17.9312	17.807	17.7728	17.8229	18.4032	17.2867	17.5201	17.1209	17.6384	17.9967	17.251	17.2533	18.152	17.9746	18.1571	17.3496	17.8272	17.5717	17.826	17.7209
TG(52:5)	Positive	9.85e-06	1.33899	1	20.9602	19.6213	20.9087	19.277	21.3728	20.2699	19.9454	18.7568	20.1218	19.3371	21.7575	21.1116	21.7527	20.5181	21.5136	19.3729	20.6757	19.4168	21.6182	20.6485	20.1009	19.3756	20.8769	19.6544	20.4728	19.3981	19.6458	17.6528	20.9248	19.4351	21.556	20.8854	19.9657	18.1772	21.1887	19.3069	21.3003	18.4903	22.0651	20.8965	21.4416	20.4438
TG(52:6)	Positive	9.85e-06	0.78217	1	21.8971	21.1149	21.79	20.9248	22.9082	22.2629	21.5879	21.0323	21.7534	21.0541	23.3265	23.2579	20.4175	19.6219	21.9416	20.8902	21.8336	20.7643	23.0179	22.138	21.2183	20.5651	22.3683	21.4697	21.2509	20.7906	21.3751	20.1216	21.8439	21.0071	21.76	21.7275	20.5131	19.7229	22.6712	21.6219	21.8263	20.0263	21.9685	21.1453	22.5697	22.1542
TG(53:1)	Positive	1.75e-05	0.27149	1	21.6893	21.4178	22.2323	21.706	21.7965	21.7174	21.4295	21.6256	21.6954	21.4218	22.4554	22.3805	21.3114	20.9163	21.3487	20.9084	21.7107	21.7998	22.808	22.3848	22.5164	22.4488	21.9103	21.487	21.0109	21.1015	21.3352	20.682	21.3552	21.0455	21.2848	21.215	21.1007	20.7449	22.4981	21.9463	21.6072	20.872	21.0178	20.8264	21.3609	21.1253
TG(54:3)	Positive	0.000221217	0.53851	1	17.8093	17.2708	18.001	17.5058	18.7946	18.1993	16.1538	15.198	16.692	15.8494	18.7608	18.8616	18.6179	18.0772	19.1364	17.5759	17.6127	17.9329	17.9705	17.4937	17.2701	17.1219	16.8744	16.5938	18.4938	17.7591	16.7722	15.4357	17.3871	17.1943	18.705	18.5934	16.3046	15.8228	17.9235	16.9854	17.6495	16.5767	18.9089	18.7423	18.1581	17.8977
TG(55:3)	Positive	9.42e-05	1.83031	1	16.2465	14.4162	14.2965	12.9485	16.3965	14.227	16.7437	14.1502	16.1174	14.4513	17.4033	16.1749	15.256	13.5118	18.4262	14.9011	14.8053	14.865	17.8319	15.2038	14.049	13.6381	18.5842	16.1625	15.7674	15.1105	15.6641	12.7001	17.5363	14.5649	15.2722	14.6166	14.4315	14.1357	16.6951	13.8464	16.1099	13.0304	16.86	15.2284	16.6832	14.8563
TG(56:1)	Positive	1.75e-05	2.24027	1	15.5948	13.3546	13.6164	12.2036	15.9363	13.5105	15.7996	13.4159	16.235	14.5686	16.6204	15.4061	15.0064	12.6057	17.907	14.1959	14.3035	12.113	17.599	14.4526	13.4784	12.3185	17.7406	15.2255	14.9231	13.5706	15.149	11.7121	16.5063	13.6983	14.4192	12.8777	13.3258	12.7744	15.6177	12.7201	15.9207	11.8419	16.1102	14.2874	15.6823	13.5931
TG(56:2)	Positive	9.85e-06	2.39884	1	17.9733	15.5745	16.2247	13.5392	18.2631	16.17	17.9371	15.7148	18.208	16.6328	19.4041	18.2866	16.9848	14.4519	19.8781	16.67	17.0328	13.8718	19.7384	17.2327	16.0719	14.5588	19.7768	17.818	16.7976	14.9932	17.2972	13.3145	19.0454	16.447	17.3817	15.9684	16.1662	13.478	18.642	15.5522	17.8674	13.7087	18.3735	16.72	18.3752	16.3609
TG(56:3)	Positive	9.85e-06	1.04579	1	14.8258	13.78	14.6265	13.0379	16.2357	15.1506	13.9281	13.3014	14.6228	13.5025	15.8553	15.6639	14.4003	12.9332	15.0996	13.9778	14.0047	12.4723	17.1738	15.6112	13.6525	13.0561	14.8903	14.1584	15.0272	14.5861	15.1977	13.932	13.945	12.8576	13.4139	13.6767	13.4958	11.7613	14.9204	13.9953	14.691	12.4299	16.3012	15.1697	15.0349	14.3272
TG(56:4)	Positive	1.33e-05	0.09308	1	14.3994	14.3064	13.0727	13.5016	13.2219	13.3814	14.2529	14.8853	17.5136	17.4073	12.8129	12.7497	14.4835	15.0433	17.5456	17.9223	12.931	13.824	13.987	14.8483	14.4946	14.6492	15.868	16.1483	12.2024	13.0406	19.6757	18.8094	11.8301	12.4312	NA	10.9977	15.456	15.6275	13.4386	13.738	14.376	14.5214	12.0276	11.7203	NA	10.8805
TG(56:6)	Positive	0.00192399	0.40509	1	17.8735	17.4685	18.6856	17.9489	18.4854	18.1886	17.2961	17.1885	18.1115	17.7069	18.7904	18.8987	17.4519	17.1241	18.6315	17.537	17.9232	17.5378	18.5736	18.3058	18.9435	18.5409	17.8854	17.3129	16.9575	17.1296	17.6117	16.6826	17.3164	16.6711	17.1699	17.4417	16.735	16.4116	18.3041	17.6426	17.9362	16.9093	17.0911	16.8055	17.5707	17.3847
TG(60:11)	Positive	0.00101666	0.35792	1	20.1692	19.8113	19.3546	18.949	21.0892	20.8327	19.151	19.0397	21.379	20.8745	21.1092	21.0376	19.2154	18.971	22.44	21.8088	20.4922	20.9857	20.3077	20.2802	20.0676	19.8192	21.0718	20.9747	19.2889	19.0462	20.9662	19.9169	19.7642	18.9922	18.9317	19.0456	19.2007	19.2058	20.7495	20.0454	19.9188	18.7487	19.5974	18.9414	19.2884	18.7097
TG(60:12)	Positive	0.000852065	0.39383	1	18.3483	17.9545	18.8647	17.7576	18.7858	18.4555	16.8983	17.0489	19.2868	18.8184	18.6982	18.6728	19.3654	18.8225	20.2802	19.6342	18.2783	18.6709	18.3305	18.1973	18.2022	18.3444	18.7499	18.7802	17.275	17.234	18.7944	17.7217	17.3109	16.5495	17.7579	17.7491	16.8771	17.06	18.5602	17.5981	18.1262	16.748	18.3456	17.5282	18.1791	17.6985
